# Supplementary material for: Selection for increased tibia length in mice alters skull shape through parallel changes in developmental mechanisms
Source: eLife. 2021 Apr 26;10:e67612. doi: 10.7554/eLife.67612 (PMC8118654; doi:10.7554/eLife.67612)
Supplement: Figure 1—source data 1. [file elife-67612-fig1-data1.xlsx]

## Sheet: Adult Data
SpecID	Generation	Family	Line	Sex	ID	Weight	Tibia	1.X	1.Y	1.Z	2.X	2.Y	2.Z	3.X	3.Y	3.Z	4.X	4.Y	4.Z	5.X	5.Y	5.Z	6.X	6.Y	6.Z	7.X	7.Y	7.Z	8.X	8.Y	8.Z	9.X	9.Y	9.Z	10.X	10.Y	10.Z	11.X	11.Y	11.Z	12.X	12.Y	12.Z	13.X	13.Y	13.Z	14.X	14.Y	14.Z
F01ACF01	F01	A	CTL	F	1	46.17	18.5926	7.96158	3.13274	4.68309	8.06236	2.48823	8.7905	7.59751	2.30032	16.3878	7.10238	2.29132	16.4084	8.08142	2.2672	16.4579	5.31625	2.98101	17.5694	10.0149	2.96496	17.6736	5.04832	3.09727	16.7319	10.2894	3.08011	16.759	1.99597	6.67663	15.2382	13.3334	6.28254	15.8328	4.50402	2.83115	11.3179	10.8992	2.7177	11.4428	8.06398	7.68068	22.1722
F01ACF02	F01	A	CTL	F	2	32.47	18.4104	8.27429	3.0516	5.03244	8.09413	2.36429	9.37367	7.77935	2.42039	16.6165	7.29141	2.40034	16.6284	8.24047	2.38364	16.686	5.66255	3.05698	17.7863	9.90619	3.02083	17.9172	5.36313	3.10241	17.046	10.3642	3.23651	17.1182	2.04834	6.47001	15.6772	13.5781	6.46102	16.5175	4.93913	2.75725	11.4053	10.9396	2.79296	11.7214	8.00447	7.72706	22.1662
F01ECF03	F01	E	CTL	F	3	34.85	18.9063	8.19239	3.27458	4.86537	8.27821	2.44791	9.15831	7.75673	2.3418	16.5537	7.29973	2.3143	16.5751	8.18706	2.31558	16.6491	5.52955	2.9929	17.9517	9.93239	2.99201	17.9793	5.32471	3.03295	17.1126	10.2334	3.08848	17.0525	2.30187	6.31699	15.7557	13.2965	6.09549	16.393	4.80419	2.77466	11.4584	11.0051	2.80452	11.5948	7.87778	7.59677	22.6943
F01GCF01	F01	G	CTL	F	1	30.14	17.6859	8.0393	3.29215	4.83727	8.14996	2.52637	9.08323	7.64208	2.63948	16.4228	7.16788	2.61508	16.438	8.10119	2.62218	16.495	5.43752	3.25527	17.5286	9.84002	3.25122	17.5804	5.20378	3.30788	16.6873	10.1307	3.36649	16.6943	2.31851	6.5631	15.4039	13.1242	6.30945	16.0166	4.70278	2.9575	11.3907	11.0014	2.95343	11.607	7.88469	7.63073	21.8908
F01GCF02	F01	G	CTL	F	2	30.78	17.5934	8.00192	3.37325	4.66605	8.12166	2.54166	8.84176	7.67183	2.33863	16.2508	7.19885	2.32737	16.2899	8.11855	2.30931	16.3071	5.46291	2.97729	17.513	9.90196	2.90049	17.4962	5.24316	3.08074	16.6638	10.2559	3.07763	16.5244	2.36434	6.39115	15.3803	13.128	6.11259	15.8652	4.62674	2.88081	11.3244	11.0383	2.82483	11.3771	7.98135	7.29607	21.9892
F01GCF03	F01	G	CTL	F	3	33.18	18.2171	8.03425	3.51053	4.92196	8.13919	2.61276	9.10113	7.56254	2.53683	16.4473	7.11335	2.5258	16.4635	7.99461	2.50297	16.5223	5.43324	3.20959	17.5869	9.75504	3.10822	17.6629	5.23786	3.2208	16.799	10.1102	3.21609	16.8252	2.34262	6.47259	15.6712	13.0444	6.08881	16.1451	4.68548	2.94581	11.4581	10.8893	2.91718	11.5304	7.99	7.5534	21.976
F01HCF01	F01	H	CTL	F	1	33.88	18.21	8.02482	3.32492	4.81836	8.09416	2.5457	9.03168	7.61099	2.40309	16.402	7.1421	2.37737	16.4253	8.06364	2.37999	16.4669	5.49575	2.98265	17.6996	9.87013	3.02075	17.7006	5.21778	3.06661	16.8721	10.1571	3.1212	16.7963	2.14884	6.19584	15.7375	13.1243	6.08988	16.0457	4.69415	2.80869	11.4089	10.875	2.83716	11.3517	7.88642	7.6367	22.1923
F01HCF02	F01	H	CTL	F	2	37.66	17.6343	8.03882	3.3535	4.60862	8.06028	2.56093	8.9215	7.60874	2.45982	16.4408	7.15557	2.44396	16.4605	8.05641	2.43269	16.5116	5.48343	3.08353	17.6876	9.83765	3.11912	17.6728	5.24118	3.10726	16.821	10.1102	3.27384	16.7812	2.10784	6.47283	15.754	13.1195	6.27427	16.2076	4.67312	2.98291	11.4014	10.8424	2.91534	11.4931	7.91512	7.63721	22.405
F01KCF01	F01	K	CTL	F	1	41.03	18.6192	7.95026	3.35545	4.34764	8.12126	2.4579	8.81687	7.70558	2.25189	16.4175	7.24189	2.23239	16.4613	8.15762	2.22445	16.482	5.40537	2.87132	17.8261	10.0133	2.85602	17.7979	5.19882	2.95977	16.8919	10.3256	3.04374	16.7558	1.79237	6.32415	15.7626	13.501	6.12971	16.0216	4.67673	2.73939	11.2684	10.9465	2.78345	11.2772	7.98429	7.7253	22.6169
F01KCF02	F01	K	CTL	F	2	53.38	18.6813	8.08396	3.18992	4.69659	8.16959	2.4157	9.1288	7.5865	2.34945	16.5235	7.1155	2.32694	16.5422	8.02786	2.32918	16.5888	5.4231	2.82792	17.6851	9.85665	2.95329	17.7715	5.17487	2.92006	16.8126	10.2139	3.18455	16.8626	1.83433	6.33448	15.9238	13.3618	6.37804	16.1514	4.69183	2.74202	11.2877	10.9115	2.803	11.4002	7.84688	7.64092	22.5427
F01MCF01	F01	M	CTL	F	1	35.41	18.0436	8.07368	3.45651	4.79816	8.14281	2.76513	8.8501	7.69356	2.58929	16.2792	7.264	2.56309	16.2953	8.10904	2.57517	16.3456	5.48159	3.18654	17.4796	9.88934	3.29825	17.5681	5.24488	3.2096	16.7137	10.1899	3.46967	16.7036	2.07667	6.50972	15.6019	13.0251	6.46272	16.0141	4.74313	2.99293	11.326	10.8885	3.07807	11.4604	7.89474	7.59469	22.0296
F01MCF02	F01	M	CTL	F	2	32.02	17.8467	7.96858	3.39454	4.78644	8.1055	2.52812	9.14605	7.65426	2.41922	16.4344	7.16849	2.40697	16.4829	8.13102	2.39176	16.4913	5.54081	3.09784	17.6458	9.87189	3.10895	17.6052	5.31154	3.10198	16.8763	10.1488	3.23714	16.7753	2.24777	6.44562	15.6405	12.9848	6.24041	16.103	4.83531	2.86869	11.5445	10.8765	2.87216	11.6098	7.87712	7.51963	21.9761
F01CCM01	F01	C	CTL	M	1	46.5	19.136	7.96954	3.5201	4.2649	8.02545	2.71116	8.77142	7.4708	2.3062	16.3691	6.96309	2.27669	16.4043	7.95877	2.27788	16.4476	5.22151	2.90947	17.8002	9.78284	2.9118	17.8636	5.0581	2.93567	16.915	10.1104	3.08413	16.8996	1.79793	6.23456	15.713	13.2786	6.02228	16.3248	4.70638	2.89217	11.1868	10.7391	2.99426	11.3967	7.92287	7.61924	22.6186
F01ECM01	F01	E	CTL	M	1	44.47	18.4828	7.98674	3.30934	4.68029	8.09165	2.66076	9.14825	7.60585	2.18085	16.6549	7.08017	2.18019	16.7289	8.10848	2.14699	16.72	5.22773	2.89341	18.0975	10.0028	2.78115	18.1131	4.98527	2.95287	17.1745	10.3563	2.89519	17.1402	1.86776	6.61114	15.848	13.5842	6.01797	16.4476	4.58851	2.92067	11.4243	11.0963	2.88644	11.4774	8.05622	7.55887	22.7074
F01ECM02	F01	E	CTL	M	2	42.35	18.68	8.19893	3.39431	4.73142	8.16582	2.74971	9.26106	7.66998	2.50418	16.6129	7.18731	2.47215	16.6365	8.1308	2.47552	16.7224	5.37159	3.07534	18.0413	9.94712	3.07457	18.1267	5.13056	3.14667	17.1181	10.2363	3.1441	17.1899	1.86976	6.45168	15.9162	13.4287	6.0754	16.6085	4.73915	3.07131	11.3983	10.9504	3.00266	11.5276	7.84688	7.60379	22.9853
F01GCM04	F01	G	CTL	M	4	38.48	17.8739	7.83542	3.42924	4.70676	7.98859	2.58887	8.81496	7.58142	2.39424	16.3948	7.06737	2.40013	16.4634	8.08234	2.351	16.454	5.30919	3.07019	17.7431	9.96708	2.94067	17.6834	5.06904	3.15506	16.8579	10.2384	2.97448	16.7554	1.96945	6.48938	15.6773	13.4032	5.94607	16.1104	4.50721	3.03679	11.41	10.906	2.7798	11.4379	7.993	7.55128	22.1745
F01GCM05	F01	G	CTL	M	5	42.87	18.1395	7.9259	3.24451	4.68059	8.04297	2.48101	8.96266	7.59506	2.31458	16.5149	7.09816	2.28839	16.56	8.07279	2.30178	16.5931	5.27939	2.98514	17.8302	9.95053	3.05463	17.9118	5.04972	2.99979	16.934	10.2199	3.16429	16.9154	1.84251	6.39806	15.7328	13.3487	6.20133	16.2733	4.58297	2.78701	11.3478	10.9278	2.8526	11.6147	7.86587	7.55954	22.5094
F01GCM06	F01	G	CTL	M	6	41.93	18.184	8.07343	3.35456	4.72291	8.08166	2.6743	9.01638	7.61517	2.40178	16.462	7.12767	2.38006	16.486	8.09655	2.37516	16.56	5.33821	2.94877	17.7818	9.99431	2.95096	17.7603	5.11818	2.92616	16.8788	10.3201	3.01741	16.8554	1.72341	6.35631	15.7342	13.5176	6.13619	16.2418	4.66986	2.94103	11.319	10.8875	2.94735	11.4477	7.8942	7.55356	22.3845
F01HCM03	F01	H	CTL	M	3	40.91	18.6046	8.01736	3.42165	4.65314	7.98208	2.79538	8.95727	7.55051	2.45744	16.4318	7.08264	2.43868	16.4768	7.99283	2.43118	16.5042	5.39741	3.02308	17.8126	9.81948	3.02528	17.8041	5.08771	3.0693	16.8712	10.1731	3.09584	16.8523	1.78588	6.47285	15.6818	13.2304	6.22361	16.164	4.66832	2.98844	11.3319	10.6601	2.88146	11.3827	7.92862	7.66056	22.5241
F01HCM04	F01	H	CTL	M	4	43.2	17.9948	7.98802	3.42174	4.71392	8.0684	2.763	9.03123	7.67015	2.77082	16.442	7.24159	2.74438	16.4927	8.07275	2.76456	16.4966	5.41651	3.34468	17.7453	9.84253	3.40109	17.7132	5.16054	3.40844	16.8873	10.1528	3.55718	16.8167	2.0757	6.64408	15.5541	13.1958	6.36002	16.1628	4.6437	3.15823	11.383	10.8363	3.17164	11.5416	7.88351	7.62664	22.2722
F01KCM03	F01	K	CTL	M	3	45.1	18.6504	7.95937	3.34072	4.72889	8.07079	2.56898	8.97959	7.59736	2.35794	16.5007	7.10994	2.34845	16.5412	8.07837	2.32773	16.5581	5.40795	2.97767	17.8131	9.91961	3.00708	17.7188	5.18673	2.98994	16.9336	10.2686	3.17873	16.7942	1.80728	6.5095	15.7784	13.2115	6.28732	16.0944	4.6344	2.96149	11.2692	10.8744	2.95196	11.4578	7.96479	7.57725	22.5475
F01KCM04	F01	K	CTL	M	4	47.62	18.5986	8.09568	3.0999	4.49015	8.12063	2.37343	8.7401	7.55858	2.23025	16.2012	7.07439	2.21048	16.2247	8.03732	2.21301	16.2843	5.37347	2.81139	17.2899	9.9704	2.92781	17.3659	5.00651	2.85657	16.4184	10.3379	3.07394	16.472	1.58968	6.47916	15.763	13.4371	6.49232	16.1574	4.32113	2.88945	10.9854	11.1286	2.86365	11.2116	7.75398	7.55952	22.5548
F01MCM03	F01	M	CTL	M	3	40.21	17.6075	8.12724	3.52688	4.85157	8.1638	2.76713	9.0363	7.68497	2.68781	16.2146	7.21196	2.67629	16.2673	8.13763	2.66709	16.29	5.41516	3.33431	17.515	9.98374	3.33791	17.6279	5.16738	3.38952	16.7575	10.3075	3.49006	16.7448	2.08284	6.68784	15.5741	13.3058	6.47966	16.0403	4.84021	3.09866	11.3381	10.9088	3.04794	11.4208	7.93558	7.5632	22.0515
F01MCM04	F01	M	CTL	M	4	35.95	17.5183	7.99989	3.56754	5.00263	8.04214	2.91624	9.02549	7.62473	2.77363	16.3066	7.16521	2.75416	16.3418	8.06597	2.74666	16.3885	5.48745	3.28969	17.5208	9.7819	3.31308	17.6027	5.20824	3.35771	16.6816	10.1124	3.44489	16.733	1.87495	6.83798	15.2414	13.2357	6.57363	16.002	4.7173	3.211	11.3891	10.7791	3.19891	11.4604	7.86132	7.67094	22.0454
F01A1F11	F01	A	LS1	F	11	37.75	18.2884	8.08475	3.21871	4.61082	8.06008	2.37738	9.07264	7.63051	2.29909	16.2796	7.22213	2.25045	16.2909	8.03029	2.28204	16.3396	5.50526	2.77477	17.4984	9.84097	2.84831	17.5417	5.11527	2.96343	16.6224	10.165	2.96795	16.6806	1.99805	6.42963	15.3275	13.3003	6.30694	15.934	4.92239	2.45365	11.1171	11.0336	2.81588	11.3248	7.91433	7.60461	22.083
F01A1F14	F01	A	LS1	F	14	37.26	18.7684	7.88881	3.08097	4.55084	8.06952	2.35856	8.73336	7.77034	2.1744	16.2869	7.26669	2.15278	16.3083	8.25611	2.14671	16.3921	5.49101	2.74063	17.5469	9.95148	2.74159	17.7508	5.29623	2.90035	16.6792	10.2819	2.85057	16.9159	1.98239	6.49856	15.3529	13.4986	6.08982	16.0292	4.50585	2.77836	11.1859	11.0914	2.68786	11.2796	8.06492	7.44244	22.133
F01B1F05	F01	B	LS1	F	5	36.16	18.7552	7.9247	3.18266	4.50047	7.94861	2.3788	8.98461	7.5966	2.47614	16.5333	7.10375	2.44929	16.5571	8.05848	2.44433	16.6251	5.42046	3.11511	17.8344	9.87001	2.99588	17.9061	5.22026	3.15076	17.0008	10.2084	3.0893	17.0971	2.08701	6.55159	15.536	13.263	6.23905	16.1993	4.63259	2.81598	11.3	10.9144	2.67181	11.4808	7.95378	7.78914	22.4007
F01B1F08	F01	B	LS1	F	8	32.69	18.679	7.84749	3.04249	4.63372	8.08092	2.29051	8.9288	7.55168	2.40037	16.5051	7.05083	2.36717	16.575	8.04174	2.38429	16.5664	5.35054	3.08376	17.8032	9.87351	3.10724	17.7817	5.13441	3.056	17.0169	10.1337	3.18899	16.9128	1.90287	6.3964	15.7739	13.1221	6.26874	15.9206	4.52818	2.61393	11.4392	11.0082	2.63917	11.5656	7.81861	7.8472	22.4444
F01C1F08	F01	C	LS1	F	8	43.55	18.2144	8.25377	2.895	4.63555	8.22008	2.10819	8.93388	7.68355	2.41984	16.4657	7.19668	2.39499	16.4954	8.14259	2.39338	16.5271	5.58743	2.98642	17.6918	9.84338	2.98252	17.7478	5.36956	2.98054	16.9858	10.109	3.12045	16.8825	2.10074	6.63478	15.5904	13.4391	6.41191	16.1893	4.56832	2.62326	11.3124	11.1987	2.67486	11.5891	7.82498	7.74182	22.2038
F01E1F03	F01	E	LS1	F	3	34.29	18.9767	7.97757	3.38885	4.4967	7.89616	2.44944	8.84429	7.56175	2.50856	16.3294	7.10386	2.45133	16.3627	7.99866	2.48863	16.3937	5.33651	3.02537	17.602	9.75892	2.91885	17.5627	5.03842	3.07032	16.7104	10.0739	3.01138	16.6762	2.03474	6.55842	15.4048	13.1902	6.13549	15.902	4.79808	2.65164	11.162	10.6867	2.66741	11.3336	8.03371	7.65908	22.4163
F01E1F04	F01	E	LS1	F	4	37.9	18.4877	7.93436	3.45206	4.57097	7.99032	2.58897	8.87229	7.70256	2.53698	16.2051	7.19001	2.50345	16.2466	8.21453	2.51742	16.2729	5.38358	3.17658	17.5042	10.0082	3.20458	17.6666	5.21482	3.21771	16.6751	10.2843	3.39257	16.7828	1.87243	6.50935	15.5885	13.4613	6.30864	16.0161	4.63519	2.91686	11.2109	11.043	2.99975	11.3318	7.88673	7.63953	22.1944
F01F1F04	F01	F	LS1	F	4	35.47	18.5935	8.08696	3.54609	4.54575	8.16644	2.59631	9.02525	7.66805	2.43211	16.2771	7.20086	2.40719	16.3216	8.12944	2.40762	16.3456	5.62447	2.99432	17.5099	9.70587	2.86438	17.4842	5.37017	3.06022	16.8144	10.0789	3.01377	16.7718	2.19036	6.37106	15.6624	13.2919	6.09032	16.1445	4.76232	2.9293	11.1692	10.77	2.91851	11.2877	7.93437	7.63052	22.396
F01G1F01	F01	G	LS1	F	1	33.15	18.9873	8.15445	3.34482	4.43588	8.15666	2.64268	8.7571	7.58224	2.41931	16.4217	7.1478	2.37622	16.4396	8.01236	2.38434	16.5117	5.34254	2.90089	17.7821	9.69402	2.93537	17.9627	5.17104	2.98274	16.8159	10.0088	3.06131	16.96	1.99966	6.70069	15.3315	13.1897	6.49594	16.0139	4.46284	2.9679	11.3157	11.0476	2.93004	11.4834	7.81916	7.60787	22.5379
F01G1F03	F01	G	LS1	F	3	34.03	18.2835	7.85686	3.18133	4.54396	8.06698	2.46498	8.84502	7.63037	2.25226	16.2959	7.22725	2.20841	16.3355	8.02807	2.22623	16.3742	5.5575	2.53962	17.9584	9.64375	2.75928	17.7418	4.97966	2.47362	16.6799	9.94834	2.89805	16.8417	1.84196	6.40576	15.2765	13.2498	6.17958	16.0265	4.63185	2.67117	11.3149	10.8593	2.72842	11.4216	7.86087	7.61026	22.3378
F01H1F02	F01	H	LS1	F	2	34.47	17.1354	8.03697	3.40498	4.92654	8.08342	2.70929	8.89847	7.64639	2.63634	16.4149	7.19988	2.61614	16.4474	8.06193	2.61321	16.4593	5.52019	3.26548	17.5	9.76959	3.21892	17.6411	5.31197	3.26445	16.7344	10.0865	3.31257	16.7844	2.22897	6.46672	15.4462	13.1951	6.24071	15.9025	4.63423	2.89698	11.3995	10.8111	2.89676	11.5419	7.8492	7.7875	21.9042
F01I1F01	F01	I	LS1	F	1	33.15	17.7053	7.85297	3.05195	4.45638	7.93729	2.16846	8.74687	7.59987	2.34379	16.2291	7.13575	2.30979	16.2656	8.03491	2.31865	16.2763	5.35883	3.01197	17.5402	9.92948	2.92124	17.5152	5.14227	3.07484	16.6933	10.2054	3.08577	16.5934	2.03965	6.54817	15.4303	13.2229	6.05934	15.8416	4.51422	2.5047	11.2241	10.9499	2.5843	11.3922	8.00795	7.64364	22.0207
F01I1F07	F01	I	LS1	F	7	35.13	17.7484	7.97665	3.05749	4.4144	8.00762	2.09352	8.76746	7.65806	2.07379	16.5332	7.21455	2.03605	16.5645	8.08711	2.05304	16.5985	5.40197	2.65484	17.8671	9.93756	2.77767	17.8485	5.13423	2.73854	16.9515	10.2721	2.89101	16.9406	1.94909	6.40788	15.6351	13.432	5.81513	16.2714	4.38011	2.47011	11.4176	10.9715	2.33086	11.6007	7.96226	7.73649	22.4122
F01J1F03	F01	J	LS1	F	3	36.19	18.3931	7.70842	3.23822	4.46939	7.80713	2.43299	8.7123	7.39459	2.36597	16.2307	6.90038	2.34299	16.2818	7.87825	2.34239	16.3093	5.15543	3.05861	17.7318	9.74678	3.00324	17.7054	4.94038	3.02334	16.9093	10.0393	3.06554	16.8626	1.76559	6.4337	15.6569	13.2967	6.08588	16.0771	4.27564	2.82528	11.0766	10.827	2.67191	11.3502	7.88111	7.67225	22.4385
F01K1F04	F01	K	LS1	F	4	42.93	18.7121	8.03408	3.31674	4.58019	7.99101	2.52209	8.8308	7.63551	2.27	16.3678	7.12513	2.24321	16.4348	8.1141	2.23692	16.4335	5.44586	2.94184	17.8075	9.73599	2.90836	17.8365	5.23586	2.95182	16.9274	10.0681	3.02847	16.8667	1.89046	6.6691	15.4348	13.2037	6.24987	16.1717	4.57432	2.90159	11.0893	10.8263	2.84968	11.2576	7.86496	7.68132	22.5154
F01K1F05	F01	K	LS1	F	5	38.26	17.9269	7.75444	3.43965	4.72575	7.86536	2.62187	9.01403	7.55924	2.38245	16.3027	7.05215	2.35833	16.3456	8.0359	2.35874	16.3778	5.38744	3.04872	17.6003	9.55858	3.01786	17.6118	5.14758	3.09871	16.7623	9.85932	3.12777	16.7026	2.14515	6.64189	15.1557	12.93	6.17255	16.0442	4.46008	2.98925	11.2639	10.7485	2.84797	11.4085	7.92031	7.72519	22.1534
F01L1F06	F01	L	LS1	F	6	36.86	18.0668	7.94882	3.17548	4.4603	8.0922	2.34585	8.97222	7.59734	2.20536	16.3532	7.12087	2.19426	16.3798	8.05295	2.16297	16.4232	5.39648	2.82958	17.6621	9.77614	2.71111	17.8023	5.20339	2.8539	16.8823	10.0232	2.78511	16.9094	2.00402	6.58799	15.6852	13.1561	6.09168	16.07	4.44752	2.68387	11.2712	10.9514	2.60366	11.4441	7.91707	7.48907	22.5549
F01M1F01	F01	M	LS1	F	1	33.53	18.4586	8.02552	3.19287	4.65998	7.9679	2.48178	9.1667	7.53734	2.50997	16.4097	7.09774	2.4775	16.4575	7.96848	2.4788	16.473	5.3611	3.04757	17.6321	9.7753	3.05249	17.675	5.11946	3.13531	16.888	10.0874	3.16697	16.8593	2.04579	6.72939	15.3383	13.1615	6.1818	16.0076	4.40353	2.8805	11.3839	11.0171	2.84778	11.5554	7.95162	7.55465	22.043
F01M1F04	F01	M	LS1	F	4	37.46	18.2001	7.8354	3.20496	4.75575	8.02757	2.39906	9.10086	7.53916	2.34956	16.4363	7.0786	2.29044	16.459	7.97767	2.33879	16.4948	5.35245	2.9408	17.6064	9.7656	2.93348	17.6982	5.1251	2.92943	16.8577	10.0823	2.99481	16.8579	2.01044	6.37729	15.5732	13.1986	6.27868	16.082	4.4951	2.76144	11.4132	11.0544	2.79391	11.5229	7.78184	7.59211	21.9069
F01N1F02	F01	N	LS1	F	2	36.31	17.9972	7.79966	3.32038	4.59938	7.8758	2.47169	8.90325	7.55293	2.38712	16.4002	7.11083	2.37599	16.441	7.98074	2.35531	16.4823	5.42786	2.95977	17.6887	9.65912	2.9045	17.7536	5.25181	3.0418	16.8251	10.0089	3.07207	16.8234	2.05262	6.7345	15.2254	13.1362	6.02193	16.0167	4.65844	2.81148	11.4415	10.5595	2.66478	11.4063	7.99405	7.54635	22.3071
F01A1M07	F01	A	LS1	M	7	38.64	18.9776	7.79656	3.28436	4.61123	7.99622	2.44039	9.09441	7.56555	2.3415	16.4179	7.10207	2.31402	16.4284	8.00445	2.29552	16.4902	5.49954	2.82889	17.8142	9.69688	2.74565	17.822	5.27953	2.8127	17.0224	10.0335	2.92498	16.9581	1.96091	6.48077	15.7731	13.3149	6.17894	16.2966	4.68029	2.75637	11.3253	10.771	2.78303	11.539	7.96363	7.6683	22.2543
F01A1M09	F01	A	LS1	M	9	43.87	18.5807	7.67535	3.42386	4.54151	7.90021	2.48703	9.08681	7.57018	2.30189	16.4978	7.09732	2.27523	16.5302	8.03503	2.27083	16.5737	5.45742	2.78809	17.875	9.82608	2.76316	17.9338	5.13046	2.92605	16.9964	10.1716	2.85704	16.9892	1.87217	6.36247	15.7627	13.5027	6.03265	16.192	4.46504	2.86954	11.3013	10.8546	2.73412	11.3626	8.01632	7.65313	22.5399
F01B1M03	F01	B	LS1	M	3	44.08	18.3978	8.09816	3.32533	4.5616	8.11016	2.63262	9.02535	7.7162	2.5082	16.5852	7.25121	2.49006	16.5993	8.15583	2.47633	16.6593	5.52716	3.15709	17.788	9.87603	3.12755	17.8267	5.3517	3.14387	16.8858	10.1785	3.24551	16.9419	2.06704	6.48219	15.5804	13.351	6.33904	16.2757	4.67704	2.94426	11.3378	10.9403	2.84798	11.5505	7.81435	7.69047	22.4603
F01C1M04	F01	C	LS1	M	4	41.86	18.4108	8.03786	3.20785	4.54534	8.06311	2.43683	9.0637	7.59215	2.45722	16.3955	7.16888	2.40493	16.4159	8.015	2.43884	16.4857	5.55348	2.77898	17.9746	9.69007	3.06054	17.8229	5.32196	2.85746	16.8667	10.0629	3.16447	16.9508	1.84611	6.54244	15.5719	13.3731	6.217	16.2778	4.64534	2.81122	11.3934	10.9083	2.72009	11.429	7.90607	7.66134	22.3316
F01C1M06	F01	C	LS1	M	6	40.27	18.6638	8.00695	3.27075	4.62926	7.91545	2.65002	8.95261	7.50824	2.49649	16.3659	7.0401	2.47482	16.4067	7.95112	2.46283	16.4553	5.38346	3.0418	17.7087	9.73451	2.92469	17.8757	5.17653	3.05402	16.8331	10.0094	3.06722	16.852	1.96551	6.79849	15.535	13.289	6.37761	16.1119	4.45668	3.00315	11.339	10.7719	2.8957	11.3152	7.96243	7.61188	22.3127
F01E1M13	F01	E	LS1	M	13	46.91	18.8323	8.3409	3.26135	4.29208	8.08864	2.64253	8.92636	7.57232	2.61996	16.2264	7.06521	2.61284	16.2637	8.06969	2.57109	16.3125	5.28266	3.33002	17.563	9.82772	3.13142	17.6804	4.99163	3.43513	16.7241	10.2655	3.27925	16.7906	1.85448	6.76094	15.555	13.4916	6.46208	16.0118	4.59963	3.07521	11.183	10.8065	2.91975	11.2655	7.88217	7.6665	22.2952
F01F1M09	F01	F	LS1	M	9	42.36	18.4191	8.07483	3.40448	4.87674	7.99793	2.68045	9.07158	7.51392	2.47742	16.3415	6.99365	2.44509	16.3798	8.03116	2.4483	16.413	5.43973	2.90277	17.6955	9.75511	2.96971	17.8365	5.16771	2.92005	16.7529	10.0952	3.05997	16.8758	1.93879	6.54102	15.7042	13.0864	6.06428	16.295	4.54977	2.92607	11.2148	10.8323	3.11283	11.4728	7.84631	7.60209	22.3784
F01F1M11	F01	F	LS1	M	11	45.39	18.7082	7.82918	3.43098	4.6065	7.9784	2.53884	9.02895	7.63533	2.29529	16.4761	7.10101	2.27862	16.537	8.15085	2.26925	16.554	5.42503	2.91933	17.8633	9.8196	2.84893	17.7971	5.18821	2.89058	16.9864	10.1353	3.03555	16.8997	1.94078	6.34952	15.4683	13.3378	6.2017	16.1106	4.61311	2.8199	11.2993	10.8664	2.81821	11.4465	7.95473	7.581	22.4713
F01G1M07	F01	G	LS1	M	7	37.77	18.5683	7.92699	3.55548	4.51014	7.93136	2.71826	8.75086	7.48955	2.42525	16.1087	7.08367	2.39594	16.1343	7.88125	2.3917	16.1836	5.60564	2.79889	17.4637	9.50904	2.82073	17.5982	5.26821	2.91541	16.6454	9.79634	2.88546	16.6824	2.02496	6.47003	15.5568	13.0784	6.01547	15.9257	4.52465	2.89437	11.056	10.7266	2.84489	11.2593	7.9506	7.44392	22.432
F01H1M12	F01	H	LS1	M	12	38.48	17.1554	7.88627	3.42503	4.68699	7.88122	2.71553	8.71783	7.46011	2.52466	16.3155	6.99959	2.5231	16.3345	7.90015	2.48437	16.3809	5.25742	3.11718	17.6992	9.77209	3.12247	17.7124	4.93289	3.18156	16.8714	10.1324	3.24918	16.8166	1.79403	6.29697	15.6446	13.1029	6.14046	16.0986	4.27266	3.04336	11.1069	10.9046	2.9313	11.3449	7.84276	7.66175	21.9106
F01H1M16	F01	H	LS1	M	16	44	18.0091	7.93854	3.22856	4.72607	7.93637	2.63898	9.16984	7.46536	2.49782	16.5429	6.96481	2.45953	16.5827	7.95072	2.47933	16.6097	5.17919	3.08754	17.811	9.77166	3.04516	17.9835	5.03672	3.07168	16.9173	10.1089	3.12903	17.0404	1.79746	6.43325	15.8492	13.1521	6.08811	16.3113	4.40455	2.9154	11.5995	10.7887	2.85711	11.6215	7.88121	7.70038	22.4165
F01I1M13	F01	I	LS1	M	13	37.66	17.9284	7.94349	3.21995	4.28397	8.04911	2.48953	8.81345	7.58286	2.28163	16.3063	7.13545	2.25236	16.3484	8.01474	2.25863	16.3759	5.48712	2.70131	17.5858	9.7788	2.69143	17.6336	5.25921	2.82784	16.7382	10.1609	2.90101	16.8194	1.98901	6.30624	15.4556	13.4445	6.09244	16.0068	4.51501	2.82463	11.2461	10.9109	2.73361	11.3688	8.01717	7.6349	22.4448
F01J1M07	F01	J	LS1	M	7	35.04	17.7932	7.94849	3.40033	4.75181	8.0005	2.60939	9.16862	7.57112	2.43944	16.2116	7.0683	2.41848	16.2738	8.0692	2.40682	16.2529	5.31356	3.04093	17.4395	9.91114	2.96493	17.4525	5.02451	3.11084	16.7029	10.193	3.05231	16.6007	1.99308	6.47798	15.4426	13.3362	6.16079	15.9078	4.42507	3.01445	11.3629	10.9388	2.81099	11.4294	7.96386	7.51109	22.1866
F01J1M08	F01	J	LS1	M	8	37.77	17.9812	7.59906	3.26882	4.58965	7.9237	2.60232	8.89019	7.51576	2.23273	16.36	7.05368	2.2183	16.4056	7.97991	2.19902	16.4463	5.23427	2.89587	17.8422	9.84878	2.88046	17.8199	4.99034	2.88546	17.0349	10.1533	2.94322	16.9874	1.69599	6.45043	15.7142	13.2976	6.13009	16.3056	4.36674	2.81327	11.2597	10.8876	2.77087	11.329	7.79804	7.64677	22.2515
F01K1M12	F01	K	LS1	M	12	49.19	18.8423	7.85212	3.68213	4.51211	7.94868	2.83296	8.93334	7.55196	2.42678	16.3666	7.06091	2.39848	16.3966	8.02204	2.40384	16.4301	5.28768	2.99143	17.8047	9.83279	2.96504	17.7879	5.05955	3.00209	16.9232	10.1008	3.01936	16.8772	1.78918	6.40958	15.981	13.2979	6.10856	16.2889	4.41402	3.04608	11.2224	10.82	3.01714	11.3027	7.85352	7.61775	22.5228
F01L1M09	F01	L	LS1	M	9	41.9	18.0282	7.82866	3.21803	4.59524	7.89892	2.26909	8.91605	7.47189	2.20838	16.3829	7.02027	2.19194	16.4197	7.89906	2.16744	16.4652	5.23933	2.83239	17.7144	9.9227	2.74775	17.8013	5.01021	2.8902	16.8915	10.2039	2.88754	16.9349	1.75838	6.34593	15.6173	13.3499	6.09154	16.2934	4.33722	2.60922	11.2286	10.856	2.55081	11.454	7.92266	7.52422	22.5422
F01L1M12	F01	L	LS1	M	12	43.08	17.6752	7.60372	3.27685	4.69651	7.88507	2.56262	9.12167	7.47903	2.42435	16.29	7.03782	2.3904	16.3411	7.89635	2.38653	16.3579	5.30607	2.89988	17.8118	9.6568	2.77617	17.7736	5.07849	2.91027	16.9403	10.0008	2.88919	16.8589	1.96233	6.50935	15.779	13.3595	6.03736	16.067	4.39714	3.00207	11.3302	10.7691	2.79949	11.3425	8.00357	7.597	22.239
F01M1M16	F01	M	LS1	M	16	51.42	18.8039	7.8672	3.40536	4.7713	7.74951	2.64737	8.96424	7.55806	2.27275	16.3316	7.09979	2.23853	16.3569	7.97537	2.23504	16.413	5.29646	2.85004	17.7342	9.90489	2.6768	17.9765	5.11829	2.89133	16.8979	10.3772	2.96271	16.8376	2.15443	6.35359	15.7684	13.2058	6.10466	16.0653	4.55162	2.90549	11.3809	10.7715	2.79846	11.4837	7.91997	7.39596	22.2137
F01N1M12	F01	N	LS1	M	12	40.31	18.8195	7.87802	3.33174	4.31799	7.97328	2.67782	8.74811	7.48229	2.47636	16.3697	6.96603	2.45664	16.4018	7.99172	2.44945	16.453	5.33451	3.04858	17.6996	9.74208	2.92982	17.8145	5.1446	3.06017	16.7965	10.1673	3.16244	16.8952	1.93711	6.47597	15.5606	13.2676	6.27585	16.1056	4.44776	2.99375	11.1679	10.8697	2.9229	11.319	7.85229	7.55225	22.5386
F01N1M13	F01	N	LS1	M	13	43.43	18.1281	8.08428	3.36713	4.64651	8.17869	2.57816	8.46903	7.61794	2.33749	16.163	7.12668	2.30071	16.2368	8.09778	2.3184	16.2126	5.45752	2.83507	17.4619	9.79773	2.89512	17.5382	5.20722	2.89289	16.6268	10.1572	3.05184	16.7096	1.95578	6.33308	15.5268	13.3681	6.08166	16.0915	4.63399	2.89919	11.1014	10.8735	2.81436	11.2443	7.86812	7.55643	22.2029
F01A2F02	F01	A	LS2	F	2	47.23	18.7293	8.01107	3.32991	4.66254	8.00886	2.70418	8.94963	7.63341	2.47842	16.3217	7.16204	2.46484	16.3721	8.08994	2.45238	16.3786	5.40948	3.13591	17.6776	10.002	3.0929	17.6001	5.14572	3.1429	16.8188	10.3525	3.2576	16.688	2.12159	6.47533	15.6956	13.3393	6.19131	16.0543	4.59287	2.99088	11.2392	10.9547	2.89242	11.342	8.05521	7.75266	22.0348
F01A2F04	F01	A	LS2	F	4	34.6	18.224	7.9215	3.19397	4.89934	7.93732	2.40788	9.14833	7.61024	2.46087	16.505	7.11195	2.45383	16.5417	8.10575	2.43058	16.5876	5.43992	3.07022	17.6948	9.95008	3.03501	17.7732	5.17449	3.1305	16.8097	10.2564	3.11318	16.8166	2.07731	6.45513	15.7466	13.1896	6.23986	16.1327	4.61161	2.78151	11.3858	10.806	2.6794	11.583	8.08963	7.73023	22.0709
F01C2F06	F01	C	LS2	F	6	40.42	18.1256	7.9815	3.59595	4.58453	8.09175	2.79799	9.0511	7.64268	2.56764	16.5127	7.15216	2.54365	16.5471	8.1031	2.54298	16.5793	5.50166	3.10029	17.8262	9.7954	3.12978	17.8335	5.24912	3.13899	16.941	10.0865	3.21177	16.9056	2.221	6.29151	15.7109	13.0401	6.09379	16.1233	4.73791	3.07241	11.2742	10.7643	3.00806	11.3704	7.99513	7.67312	22.4415
F01C2F08	F01	C	LS2	F	8	45.28	18.4659	8.16656	3.30425	4.80184	8.3131	2.55424	9.1311	7.71132	2.53957	16.5819	7.2354	2.52139	16.5879	8.16911	2.51586	16.6569	5.48673	3.11167	17.7086	9.91392	3.20111	17.8449	5.26277	3.19414	16.8223	10.2472	3.3614	16.9035	2.12921	6.35049	15.4421	13.2334	6.25578	16.0257	4.88087	2.91687	11.4677	11.041	2.98131	11.4246	7.81437	7.78545	22.2666
F01D2F05	F01	D	LS2	F	5	29.24	18.3026	8.41238	3.38344	4.70047	8.39529	2.67592	9.03937	7.79406	2.49956	16.3474	7.3324	2.47508	16.367	8.23612	2.47878	16.4139	5.58164	3.10527	17.5843	9.98838	3.21799	17.7351	5.35261	3.17036	16.7429	10.3023	3.30103	16.8987	2.23874	6.4258	15.371	13.2149	6.37109	16.1475	4.92498	2.93506	11.3393	11.12	3.01407	11.5206	7.79251	7.70537	22.3408
F01E2F03	F01	E	LS2	F	3	43.11	18.525	8.06625	3.40588	4.76068	8.1418	2.56633	8.86925	7.57264	2.32929	16.2996	7.11757	2.31015	16.3508	8.01061	2.29884	16.3727	5.38969	3.0021	17.7372	9.80407	2.98567	17.8374	5.17867	3.08197	16.7912	10.106	3.13649	16.7902	2.08365	6.40486	15.4589	13.3519	6.1743	16.0345	4.65583	2.86823	11.1353	10.9608	2.8123	11.3283	7.8884	7.73792	22.291
F01E2F04	F01	E	LS2	F	4	40.35	18.6504	8.03597	3.18705	4.66491	8.01705	2.33757	8.85639	7.54297	2.24739	16.5382	7.08202	2.22903	16.5614	7.98618	2.21428	16.5949	5.29473	2.92595	17.7875	9.83786	2.93357	17.8236	5.05218	3.02553	16.8908	10.1485	3.0754	16.855	1.98039	6.39647	15.654	13.2427	6.20794	16.0831	4.52101	2.80515	11.148	10.9718	2.71502	11.255	7.87453	7.8227	22.2824
F01F2F03	F01	F	LS2	F	3	35.05	19.097	7.99757	3.40522	4.65635	8.04995	2.78001	9.13662	7.59159	2.53095	16.3431	7.10895	2.514	16.3799	8.06583	2.49109	16.4162	5.42026	3.05981	17.708	9.87219	3.06501	17.814	5.12301	3.20318	16.8354	10.2026	3.19394	16.8444	2.06279	6.77122	15.5414	13.2259	6.26559	15.988	4.57296	3.16648	11.2399	10.8547	3.01111	11.3753	7.85537	7.63662	22.4988
F01G2F04	F01	G	LS2	F	4	33.58	18.664	8.01393	3.40846	4.42929	8.11675	2.61513	8.65886	7.62603	2.49283	16.3095	7.15585	2.47932	16.3477	8.07098	2.45949	16.3556	5.35021	3.10034	17.6505	9.92009	3.02702	17.6184	5.15508	3.17541	16.8105	10.2181	3.23795	16.663	2.12325	6.23373	15.7296	13.2863	6.06372	16.0543	4.74582	2.9216	11.1257	10.7157	2.82873	11.1608	7.98327	7.6213	22.1733
F01G2F08	F01	G	LS2	F	8	41.93	18.5629	8.0896	3.39363	4.54695	8.18391	2.65103	8.95087	7.5983	2.39468	16.4603	7.09483	2.38943	16.5031	8.0885	2.36294	16.5407	5.32454	2.99713	17.851	9.93094	2.98901	17.8484	5.14031	3.0074	16.9347	10.2248	3.13255	16.9161	1.99564	6.32394	15.7639	13.3388	6.10276	16.2239	4.76523	2.89816	11.4875	10.8974	2.8731	11.5024	7.88515	7.74071	22.1855
F01H2F04	F01	H	LS2	F	4	34.07	18.6168	8.11443	3.67474	4.65625	8.17778	2.90335	8.82194	7.63908	2.7209	16.1197	7.19393	2.69444	16.126	8.0739	2.6968	16.2103	5.56549	3.17411	17.4729	9.81798	3.24936	17.5664	5.26066	3.23355	16.6581	10.1848	3.42631	16.7139	2.14063	6.50289	15.6191	13.1595	6.42571	16.0592	4.68048	3.08684	11.0814	10.8998	3.07832	11.2735	7.86886	7.78343	22.1616
F01H2F08	F01	H	LS2	F	8	44.48	18.6354	7.91313	3.49559	4.62726	8.01648	2.66057	9.04628	7.56864	2.47278	16.337	7.0962	2.44489	16.3709	8.03286	2.44994	16.4016	5.51536	3.01005	17.7464	9.73368	3.09025	17.6998	5.16683	3.06473	16.9561	10.1124	3.27683	16.8568	1.8877	6.32349	15.7722	13.2929	6.23026	16.2973	4.4998	2.91954	11.1953	10.7678	2.9659	11.4719	7.9382	7.55474	22.2833
F01I2F08	F01	I	LS2	F	8	36.93	18.5285	7.94959	3.4073	4.48264	8.0199	2.75386	8.97736	7.55515	2.59666	16.2347	7.11615	2.56459	16.2482	7.96828	2.5636	16.3062	5.3181	3.1407	17.6849	9.80277	3.1465	17.6888	5.04051	3.25656	16.8041	10.1561	3.33846	16.7896	1.86312	6.60084	15.7093	13.3823	6.21535	16.1418	4.57157	3.0425	11.2798	10.8083	3.00878	11.2562	7.92519	7.75172	22.3709
F01J2F02	F01	J	LS2	F	2	50.6	18.1634	8.07929	3.21412	4.61908	8.10091	2.40607	9.0552	7.59675	2.33019	16.4155	7.08915	2.32472	16.4412	8.08923	2.29801	16.4961	5.2678	3.08297	17.7671	9.93314	3.00406	17.7658	5.04372	3.11586	16.9142	10.2442	3.0815	16.8485	2.08749	6.50973	15.6689	13.3238	6.06297	16.1539	4.69669	2.70409	11.4348	10.8989	2.71892	11.5024	7.93631	7.72528	22.4772
F01J2F03	F01	J	LS2	F	3	39.2	17.8259	7.98427	3.32054	4.64054	8.07714	2.44163	9.10384	7.58775	2.44959	16.2303	7.08787	2.44062	16.2744	8.0705	2.42415	16.2955	5.32429	3.14365	17.5116	9.95186	3.10998	17.5809	5.07598	3.1751	16.6823	10.2747	3.17466	16.6601	2.09368	6.40427	15.57	13.2382	6.11178	15.9468	4.66304	2.76481	11.2546	10.8696	2.70577	11.2636	7.84404	7.76561	22.0716
F01K2F06	F01	K	LS2	F	6	37.2	18.6414	8.05899	2.97783	4.83731	8.15252	2.12863	8.65779	7.66244	2.48583	15.9807	7.22568	2.46526	15.9925	8.08257	2.45705	16.0561	5.60569	3.09445	16.9821	9.7457	3.03617	17.1138	5.38461	3.13581	16.219	10.1035	3.12406	16.3096	2.30585	6.5715	14.9742	13.173	6.22629	15.5739	4.69974	2.7291	11.0164	11.1062	2.69369	11.1891	8.02873	7.64168	21.2516
F01L2F02	F01	L	LS2	F	2	33.78	18.0889	7.83905	3.33124	4.67316	8.03764	2.62201	8.959	7.62952	2.44575	16.093	7.09612	2.43218	16.1241	8.12507	2.41963	16.1632	5.25473	3.12181	17.3821	10.0418	3.10192	17.4633	5.06304	3.12232	16.5065	10.3656	3.21523	16.5467	1.91582	6.59637	15.374	13.4131	6.26297	15.8333	4.48364	2.99105	11.2279	11.002	2.93288	11.3262	7.93033	7.61132	22.0393
F01L2F03	F01	L	LS2	F	3	35.94	17.7971	7.98252	3.48306	4.62252	8.07817	2.74213	9.04462	7.59519	2.44365	16.2209	7.09136	2.4341	16.2493	8.08576	2.41026	16.3014	5.24901	3.03861	17.6465	9.89629	3.00778	17.606	4.94092	3.06906	16.7108	10.2368	3.13557	16.6259	1.98665	6.44639	15.4131	13.2325	6.06228	16.0462	4.6568	2.96822	11.2302	10.9332	3.00865	11.4464	7.86357	7.58879	22.0536
F01M2F04	F01	M	LS2	F	4	37.01	18.4709	8.07386	3.34896	4.4796	8.16421	2.72477	8.92157	7.5894	2.42662	16.3675	7.12242	2.40141	16.4136	8.03516	2.39967	16.449	5.36347	3.03916	17.7082	9.85919	3.0298	17.7482	5.16943	3.05844	16.8305	10.0932	3.10085	16.8647	1.98633	6.59612	15.4075	13.2003	6.2154	16.0775	4.73066	2.99208	11.2819	10.7719	2.9457	11.42	7.88452	7.6144	22.3759
F01N2F05	F01	N	LS2	F	5	36.49	18.2614	8.15257	3.16494	4.52673	8.18872	2.47791	8.50259	7.74034	2.18998	16.0999	7.29512	2.16504	16.1414	8.17036	2.16679	16.1706	5.53067	2.81361	17.5327	9.91848	2.82668	17.528	5.28384	2.89279	16.6495	10.2303	3.00109	16.5882	2.19831	6.37381	15.437	13.2204	6.10434	15.9623	4.67439	2.7362	10.964	11.0764	2.75673	11.07	7.9483	7.45071	22.3197
F01B2M10	F01	B	LS2	M	10	41.92	18.3878	7.99232	3.22189	4.76485	8.12183	2.49317	9.07318	7.66387	2.60747	16.4395	7.18459	2.58272	16.4872	8.11334	2.58837	16.4909	5.45164	3.15974	17.7311	9.86733	3.20286	17.7169	5.25623	3.1917	16.8654	10.1698	3.34712	16.8117	2.19512	6.43725	15.6298	13.1613	6.15451	16.2262	4.66245	2.90554	11.4509	10.9323	3.00188	11.595	7.93928	7.53396	22.1776
F01B2M11	F01	B	LS2	M	11	37.68	18.1596	7.97822	3.1557	4.7423	7.98872	2.49632	9.01496	7.6059	2.59947	16.199	7.12631	2.56594	16.2245	8.07239	2.58102	16.2743	5.46712	3.1726	17.5093	9.80526	3.21929	17.6514	5.2259	3.23396	16.6861	10.1591	3.40504	16.6675	2.24845	6.28959	15.6403	13.0399	6.15448	16.0587	4.59602	2.90635	11.2588	10.933	2.96328	11.4192	7.82267	7.6283	22.1433
F01C2M10	F01	C	LS2	M	10	42.3	18.5013	7.83807	3.35976	4.59155	8.06892	2.70025	8.90516	7.52151	2.41264	16.3885	7.05679	2.38062	16.431	7.97415	2.39555	16.4538	5.35817	2.9784	17.666	9.79017	3.0053	17.689	5.08399	3.03649	16.7591	10.1286	3.15056	16.7273	1.93231	6.40278	15.4532	13.2261	6.14461	16.0538	4.59799	2.94573	11.214	10.8628	3.00204	11.2732	7.86417	7.53684	22.4548
F01D2M09	F01	D	LS2	M	9	41.47	18.5689	7.84383	3.38636	4.39684	8.00383	2.71102	8.98687	7.60189	2.54764	16.5389	7.13911	2.52192	16.5527	8.05312	2.52673	16.6177	5.28269	3.12646	18.0235	9.93265	3.13564	18.0106	5.00437	3.1473	17.1688	10.2999	3.25461	17.0899	1.75319	6.63848	16.1429	13.5131	6.40152	16.5034	4.56079	2.95561	11.3074	10.9413	2.98838	11.3826	7.92143	7.67656	22.8019
F01D2M10	F01	D	LS2	M	10	41.11	18.2971	7.95394	3.28186	4.63558	8.11017	2.59975	8.69905	7.58215	2.44795	16.4229	7.09226	2.41924	16.4528	8.03524	2.43176	16.4882	5.22084	3.03366	17.7259	9.89651	3.10097	17.7462	4.97981	3.06312	16.8439	10.232	3.25384	16.7893	1.87896	6.58718	15.652	13.3649	6.55134	16.0005	4.49389	2.91694	11.3143	11.0633	3.01313	11.4785	7.86108	7.59021	22.3405
F01E2M06	F01	E	LS2	M	6	44.15	18.6258	8.09577	3.45623	4.53667	8.17348	2.69469	8.81477	7.66358	2.30197	16.3394	7.19073	2.28231	16.3786	8.1115	2.27058	16.423	5.4087	2.89906	17.8351	9.95378	2.86761	17.8765	5.13928	2.94348	16.8985	10.3174	2.99993	16.8739	2.02589	6.36583	15.5946	13.3803	6.21954	16.1684	4.77046	2.92505	11.1363	10.9054	2.86851	11.2393	7.97349	7.64562	22.5154
F01F2M10	F01	F	LS2	M	10	43.94	18.7496	8.02388	3.56595	4.58138	8.22666	2.94574	8.94543	7.69952	2.55538	16.2047	7.21374	2.52355	16.2635	8.15464	2.52023	16.2933	5.53948	2.99468	17.6916	9.83517	2.98425	17.7502	5.28048	3.0171	16.8424	10.1959	3.08047	16.837	2.17915	6.40128	15.7876	13.3464	6.13987	16.3992	4.81676	3.19093	11.1668	10.9299	3.14585	11.3305	7.89195	7.57117	22.4863
F01F2M11	F01	F	LS2	M	11	49.13	18.6552	8.00674	3.28635	4.80318	8.09879	2.81405	8.95175	7.67683	2.56967	16.3103	7.18663	2.54185	16.3527	8.1379	2.5524	16.363	5.308	3.1285	17.6572	9.95457	3.15892	17.6753	5.07503	3.18906	16.8364	10.2867	3.31443	16.8147	1.93395	6.57759	15.7205	13.263	6.36207	16.2232	4.6431	3.06174	11.2481	10.9206	3.07762	11.3362	7.91358	7.54772	22.2926
F01G2M06	F01	G	LS2	M	6	41.45	18.9373	7.96336	3.27147	4.64096	8.07999	2.63054	9.11063	7.50085	2.37398	16.4605	7.01546	2.36048	16.4864	7.9679	2.34056	16.5322	5.15324	3.01406	17.893	9.87724	2.93166	17.8365	4.88251	3.09399	16.9293	10.1794	3.02005	16.9106	1.82319	6.56556	15.6378	13.3533	6.04026	16.328	4.60592	2.97395	11.3203	10.8183	2.86095	11.4723	7.92887	7.6309	22.2608
F01H2M07	F01	H	LS2	M	7	42.86	18.3109	7.9204	3.58921	4.69573	7.99262	2.75197	9.04659	7.43078	2.58545	16.136	6.96857	2.56767	16.1774	7.88724	2.56468	16.2165	5.3145	3.10593	17.491	9.73122	3.16815	17.4348	4.96769	3.22261	16.6717	10.1033	3.333	16.6502	1.78171	6.57979	15.4006	13.2352	6.25513	16.0569	4.3966	3.09143	11.0693	10.8993	3.106	11.2664	7.84534	7.63842	22.2417
F01I2M12	F01	I	LS2	M	12	42.37	18.1708	7.91282	3.62168	4.65354	8.02562	3.10384	9.08772	7.53381	2.74778	16.0597	7.05357	2.74055	16.1023	7.9894	2.70452	16.1466	5.27272	3.40427	17.5741	9.78328	3.28958	17.5904	5.09938	3.44837	16.694	10.1089	3.39748	16.6904	2.0659	6.7126	15.6311	13.0443	6.35202	16.0597	4.73702	3.3589	11.2748	10.5287	3.32711	11.3087	7.95607	7.6241	22.2059
F01I2M13	F01	I	LS2	M	13	51.73	18.6533	7.90056	3.55817	4.51765	7.9887	2.99982	8.80691	7.63897	2.52577	16.1289	7.14485	2.49712	16.1677	8.10246	2.49827	16.2033	5.27099	3.08464	17.6687	9.94246	3.07254	17.5631	5.04826	3.16831	16.7518	10.202	3.24681	16.6134	1.76922	6.51153	15.6506	13.3392	6.16843	16.2061	4.62271	3.19454	11.1627	10.7442	3.15826	11.1937	8.04208	7.62793	22.3554
F01J2M11	F01	J	LS2	M	11	46.36	18.7267	7.95202	3.4081	4.63197	7.9916	2.71507	8.66706	7.45325	2.36654	16.1633	6.98895	2.34197	16.1931	7.90565	2.34447	16.2476	5.33219	2.87097	17.6274	9.70482	2.9341	17.6588	5.03808	2.91293	16.736	10.0896	3.10654	16.7594	1.88362	6.32857	15.6221	13.2395	6.03542	16.1549	4.56482	2.92338	10.9704	10.7786	2.95383	11.1666	7.84722	7.43173	22.3978
F01K2M08	F01	K	LS2	M	8	51.93	19.1597	7.85315	3.22353	4.4894	7.98556	2.61371	8.93079	7.53256	2.33098	16.5031	7.09535	2.28512	16.5252	7.95542	2.26751	16.5756	5.43014	2.97457	17.9512	9.81034	2.94456	17.8582	5.11725	2.91366	17.0467	10.1494	3.00203	16.909	1.94785	6.47945	16.0243	13.3519	6.10608	16.3216	4.68505	2.83008	11.3084	10.5198	2.70351	11.2978	7.97843	7.76524	22.663
F01K2M09	F01	K	LS2	M	9	52.07	19.1134	8.03308	3.29934	4.23941	8.08526	2.46611	8.94814	7.59989	2.19726	16.4722	7.11212	2.17082	16.4965	8.07952	2.17816	16.5535	5.37414	2.83306	17.9032	9.97554	2.87793	17.9368	5.20013	2.84615	16.9732	10.284	2.98867	16.9991	1.96404	6.25496	15.8534	13.42	5.99172	16.3545	4.6304	2.76593	11.1983	10.969	2.72594	11.2714	7.95182	7.68654	22.7942
F01M2M06	F01	M	LS2	M	6	49	18.6707	8.09178	3.49952	4.54875	7.9943	2.97847	9.19785	7.61053	2.56442	16.1877	7.14184	2.5421	16.2309	8.05529	2.52428	16.2722	5.36872	3.08952	17.6591	9.87478	3.08682	17.7292	5.12869	3.15187	16.8165	10.2198	3.18756	16.8039	1.94701	6.56388	15.4775	13.4234	6.13222	16.1219	4.74261	3.19228	11.1815	10.6878	3.10707	11.2206	7.98463	7.51029	22.2417
F01M2M07	F01	M	LS2	M	7	42.48	18.3933	7.98504	3.44115	4.63422	8.09047	2.63807	8.77706	7.54046	2.44465	16.2024	7.14593	2.41878	16.2288	7.91563	2.41798	16.2885	5.54532	2.96265	17.5865	9.74674	2.87842	17.6838	5.26113	3.06424	16.7819	10.1421	3.01516	16.7274	2.0749	6.53783	15.7794	13.2802	6.18218	16.2345	4.63865	3.07209	11.1332	10.6947	2.82738	11.1653	7.82995	7.59558	22.21
F01M2M11	F01	M	LS2	M	11	44.67	18.6141	8.246	3.45393	4.39622	8.22827	2.65823	8.73698	7.63188	2.32196	16.1547	7.07711	2.29359	16.194	8.18618	2.29813	16.2357	5.48735	2.8954	17.4752	9.96614	3.00355	17.5669	5.22864	2.93246	16.5801	10.3057	3.15335	16.638	2.02661	6.38947	15.4347	13.3184	6.19698	16.1658	4.74213	2.95193	10.9485	11.0431	3.04215	11.2164	7.7939	7.36158	22.1509
F01N2M06	F01	N	LS2	M	6	49.78	18.9514	8.03507	3.55871	4.43242	8.0675	2.87081	8.86056	7.59831	2.29953	16.3268	7.14382	2.27128	16.378	8.02336	2.26989	16.3991	5.44987	2.83514	17.8056	9.62913	2.6933	17.7908	5.16216	2.89218	16.9172	10.0864	2.88655	16.8783	2.01874	6.41055	15.7783	13.2178	6.06843	16.3685	4.70103	2.9418	11.1217	10.8836	3.05936	11.2035	7.90913	7.50067	22.771
F01N2M08	F01	N	LS2	M	8	52.26	18.7465	8.08347	3.48368	4.46398	8.08525	2.77911	8.65753	7.50641	2.44452	16.1249	7.05906	2.42415	16.1603	7.95196	2.41717	16.1973	5.36233	2.97864	17.579	9.78824	3.05166	17.6354	5.12633	3.02194	16.7034	10.0808	3.18051	16.7162	2.02644	6.50287	15.6363	13.1241	6.20464	16.1305	4.74882	3.04387	10.9261	10.8493	3.0942	11.1488	7.86438	7.45191	22.4935
F09CCF01	F09	C	CTL	F	1	33.2	17.9578	8.04587	3.58544	4.71353	8.13926	2.66648	8.83491	7.70242	2.55967	16.254	7.18586	2.54989	16.2713	8.20588	2.52681	16.3323	5.47747	3.17469	17.4727	9.97958	3.10994	17.4589	5.24219	3.21964	16.7222	10.2752	3.23169	16.6287	2.22076	6.48291	15.4271	13.251	6.17303	15.8602	4.67909	2.94927	11.3149	11.0037	2.89484	11.3696	8.12028	7.57381	21.7219
F09CCF02	F09	C	CTL	F	2	29.24	17.5554	8.04029	3.54862	4.91097	8.09673	2.6539	8.96492	7.71104	2.45569	16.3365	7.21215	2.43241	16.3712	8.17819	2.42822	16.3947	5.46875	2.98505	17.5658	9.95737	3.01909	17.5434	5.23526	3.00348	16.7778	10.2889	3.13401	16.7038	2.10338	6.38757	15.4275	13.271	6.28454	15.8978	4.62048	2.94717	11.372	11.0041	2.88659	11.4505	7.94109	7.41577	21.9464
F09CCF04	F09	C	CTL	F	4	33.35	17.853	7.99563	3.1749	4.63166	8.16061	2.38262	8.89422	7.61534	2.60653	16.15	7.12508	2.58058	16.1655	8.09795	2.59098	16.2252	5.38112	3.23936	17.3318	9.90403	3.26185	17.3943	5.16358	3.24466	16.5691	10.2207	3.31772	16.5755	2.0143	6.47854	15.4467	13.3325	6.2149	15.9806	4.48322	2.71755	11.2607	11.1573	2.86581	11.4201	7.92705	7.67443	21.5035
F09DCF01	F09	D	CTL	F	1	36.72	18.0079	7.99215	3.36353	4.78824	8.1371	2.61663	9.09041	7.69126	2.38383	16.456	7.19476	2.36889	16.5002	8.18107	2.36019	16.52	5.54159	2.93263	17.6876	9.93124	3.03978	17.6608	5.33805	2.88914	16.9311	10.2592	3.1787	16.7867	2.13826	6.3635	15.6378	13.2527	6.1657	16.0497	4.70374	2.86422	11.3753	10.923	2.84031	11.4983	7.8947	7.50925	22.2569
F09DCF02	F09	D	CTL	F	2	31.39	17.9245	8.09577	3.13972	4.75179	8.0716	2.38577	9.05371	7.59677	2.34617	16.4656	7.07328	2.32743	16.4874	8.09697	2.33045	16.5501	5.38894	3.00308	17.6957	9.82566	2.97265	17.7022	5.14803	3.01924	16.8993	10.1724	3.07519	16.8483	2.01626	6.39492	15.6865	13.312	6.15366	16.1712	4.59914	2.75382	11.2318	10.886	2.66884	11.4544	7.88395	7.49325	22.1765
F09DCF03	F09	D	CTL	F	3	32.68	17.7979	8.02728	3.46549	4.70308	8.12659	2.74327	8.87891	7.54199	2.50921	16.3259	7.053	2.49667	16.3471	8.03266	2.47563	16.3995	5.38642	3.17045	17.5832	9.86792	3.07276	17.6598	5.23043	3.1523	16.7151	10.1623	3.17847	16.755	2.10576	6.46408	15.4627	13.146	5.95629	16.2917	4.66752	3.0315	11.3353	10.8388	2.93169	11.4511	8.00951	7.54888	22.1799
F09DCF04	F09	D	CTL	F	4	38.59	18.3926	8.05787	3.31667	4.89821	8.10039	2.79078	8.89555	7.65363	2.57042	16.3	7.18144	2.5367	16.3454	8.11406	2.54732	16.3802	5.49383	3.07824	17.66	9.90426	3.07351	17.6882	5.25912	3.14363	16.7902	10.1681	3.16283	16.7751	2.00077	6.43621	15.601	13.4058	6.1649	15.9764	4.60608	3.0368	11.1868	10.9257	2.97577	11.3415	7.95306	7.50199	22.1466
F09DCF07	F09	D	CTL	F	7	35.7	18.2938	7.92142	3.32887	4.83285	8.00388	2.62691	8.90154	7.56592	2.38336	16.2209	7.07253	2.37727	16.2655	8.04094	2.34083	16.2964	5.38978	2.96409	17.5638	9.79548	2.87772	17.5499	5.17918	3.02319	16.7502	10.1179	3.02771	16.6625	2.03512	6.45568	15.5989	13.2936	6.18841	15.9026	4.65837	2.89246	11.326	10.8057	2.76636	11.3741	7.93377	7.4597	22.113
F09DCF08	F09	D	CTL	F	8	39.54	18.3456	8.03777	3.31842	4.84739	8.0625	2.76116	8.94869	7.66512	2.41629	16.4549	7.1811	2.40494	16.4924	8.12958	2.38433	16.5346	5.54939	3.03133	17.7223	9.84206	2.98772	17.7911	5.31097	3.11291	16.9377	10.1887	3.1359	16.9177	2.11461	6.46794	15.6731	13.419	6.06906	16.1012	4.71033	3.05703	11.3225	11.0091	2.98564	11.4197	8.00668	7.50025	22.4538
F09DCF09	F09	D	CTL	F	9	33.52	18.0258	8.13383	3.24719	4.64675	8.09276	2.47347	8.94835	7.62652	2.3223	16.2765	7.12147	2.30331	16.306	8.11682	2.29511	16.3594	5.44029	2.91204	17.546	9.84196	2.88557	17.5904	5.20493	2.95665	16.7732	10.1574	2.99131	16.7449	2.05018	6.38116	15.651	13.263	6.03942	16.0955	4.63403	2.7918	11.1786	10.9935	2.79136	11.2733	7.95514	7.48497	22.0751
F09PCF02	F09	P	CTL	F	2	34.72	17.8335	7.9706	3.32081	4.82341	8.12012	2.59664	9.07811	7.70791	2.35587	16.4244	7.20003	2.33059	16.4547	8.2027	2.32362	16.5138	5.47471	2.91262	17.7397	10.012	2.87041	17.7807	5.28532	2.96562	16.8968	10.3361	2.9959	16.874	2.08478	6.19773	15.6526	13.4831	6.01134	16.1152	4.64703	2.87267	11.2872	11.0957	2.74333	11.3904	7.97007	7.28891	22.2218
F09PCF03	F09	P	CTL	F	3	33.23	18.0247	7.80979	3.30813	4.80972	7.98725	2.69047	9.07125	7.59379	2.34027	16.4256	7.14612	2.31482	16.4486	8.03316	2.30873	16.5047	5.45925	2.79933	17.7835	9.80291	2.84558	17.7553	5.1828	2.82283	16.9466	10.1175	2.95674	16.8778	2.13457	6.36101	15.6565	13.1764	5.9167	16.1575	4.525	2.94909	11.2842	10.9169	2.78793	11.4921	8.07696	7.35303	22.2658
F09PCF05	F09	P	CTL	F	5	30.16	17.298	8.07136	3.57383	4.79138	8.15378	2.66267	9.11642	7.62844	2.3918	16.4345	7.16404	2.37656	16.454	8.07552	2.34818	16.5051	5.46634	2.93102	17.6404	9.79899	2.93722	17.7101	5.2187	2.98736	16.857	10.1593	3.08493	16.8651	2.09967	6.212	15.6233	13.1804	6.01339	16.0731	4.74341	2.8942	11.4099	10.9445	2.82987	11.4316	7.92439	7.46209	22.0685
F09PCF06	F09	P	CTL	F	6	33.44	17.929	7.90823	3.43338	4.65045	8.04618	2.55904	8.98986	7.56318	2.33571	16.3676	7.09006	2.32694	16.4243	8.03622	2.30051	16.4319	5.49317	2.95267	17.7932	9.82703	2.8696	17.7163	5.25364	3.00788	16.9066	10.1107	2.97524	16.8293	2.28133	6.3897	15.7484	13.0444	6.06723	15.9044	4.67754	2.83578	11.3837	10.7623	2.69031	11.3601	8.02977	7.32579	22.103
F09BCM07	F09	B	CTL	M	7	36.34	17.9821	8.03913	3.78549	4.66146	8.01995	2.94311	8.8805	7.55074	2.4185	16.2624	7.09221	2.41895	16.31	7.99285	2.38019	16.3383	5.42431	3.0354	17.5705	9.73846	2.95001	17.5819	5.16414	3.14087	16.7115	10.0313	3.03088	16.7071	2.02306	6.42884	15.5406	13.1614	5.90054	16.0357	4.65746	3.11949	11.2777	10.6197	2.86843	11.24	7.97146	7.57491	22.0004
F09CCM08	F09	C	CTL	M	8	41.79	18.1721	7.89729	3.14866	4.67553	8.0624	2.34364	9.06158	7.63457	2.34916	16.3624	7.13343	2.32269	16.4045	8.13978	2.32474	16.438	5.42151	2.85649	17.7169	10.0384	2.93513	17.7286	5.23765	2.77652	16.9174	10.2986	3.01527	16.8257	2.04616	6.36699	15.4892	13.4923	6.09233	16.0407	4.5275	2.65778	11.3546	11.0179	2.65446	11.4569	8.01317	7.44865	21.8668
F09CCM09	F09	C	CTL	M	9	42.17	18.8172	8.09354	3.40231	4.8475	8.135	2.69708	9.07135	7.68143	2.30825	16.3493	7.19633	2.28977	16.3815	8.1445	2.27392	16.4178	5.45856	2.88414	17.7178	9.94794	2.86529	17.7395	5.218	2.92688	16.8728	10.2347	2.96857	16.8144	1.97281	6.36382	15.5976	13.4282	6.06538	16.0133	4.68591	2.92047	11.2914	10.8986	2.80097	11.3911	8.02124	7.49286	22.1537
F09CCM10	F09	C	CTL	M	10	38.22	18.4513	8.04912	3.40339	4.77667	8.15999	2.62424	9.13804	7.6263	2.44618	16.4601	7.09679	2.4259	16.4942	8.13644	2.41732	16.5255	5.30753	3.04641	17.6504	9.98399	3.03342	17.6978	5.08503	3.06621	16.8671	10.3063	3.15029	16.8501	1.98237	6.44941	15.6057	13.431	6.16588	16.1219	4.68112	2.81728	11.3641	10.9948	2.82859	11.5291	7.928	7.57009	22.0125
F09CCM11	F09	C	CTL	M	11	39.51	18.0879	7.88153	3.12775	4.82192	7.94415	2.42107	9.01623	7.58071	2.40528	16.4462	7.0517	2.38996	16.4728	8.08264	2.38235	16.5175	5.33256	2.95715	17.6931	9.91681	2.97688	17.6313	5.09655	2.92746	16.9194	10.2314	3.12757	16.7482	1.89763	6.49284	15.4659	13.2369	6.05438	16.0663	4.48109	2.81576	11.3952	10.9559	2.73524	11.4713	7.95464	7.55708	22.0171
F09DCM11	F09	D	CTL	M	11	45.51	18.4663	7.97238	3.31327	4.82879	8.09316	2.72586	9.0617	7.5621	2.33145	16.3473	7.01197	2.30698	16.3917	8.11183	2.28682	16.4258	5.32435	2.89489	17.7164	9.98663	2.82306	17.6474	5.08979	2.96541	16.8795	10.3212	2.95472	16.736	1.82666	6.43521	15.7197	13.557	5.98562	16.1324	4.622	2.94668	11.2816	10.9562	2.81374	11.2225	8.01497	7.4454	22.406
F09DCM12	F09	D	CTL	M	12	39.29	17.9727	8.00926	3.40188	4.75911	8.11421	2.63652	9.02632	7.59823	2.3837	16.2484	7.08916	2.36265	16.3098	8.09844	2.3554	16.323	5.37377	2.97676	17.5705	9.92886	2.90113	17.6168	5.1451	2.99652	16.7578	10.247	2.96782	16.78	1.8877	6.36132	15.7567	13.4151	6.15667	16.0958	4.62148	2.88852	11.1404	10.9432	2.83579	11.3359	7.97281	7.46739	22.1044
F09PCM07	F09	P	CTL	M	7	42.45	17.7719	7.99933	3.33766	4.85953	8.08315	2.59164	9.28542	7.68061	2.3107	16.5312	7.15735	2.2908	16.5447	8.19324	2.28776	16.6052	5.42775	2.91375	17.7477	10.0418	2.88297	17.7736	5.19711	2.9605	16.9233	10.3665	3.01119	16.9062	2.01036	6.32901	15.6917	13.445	6.02509	16.2609	4.6913	2.83175	11.4131	10.9669	2.79545	11.4892	8.05917	7.47688	22.2748
F09PCM12	F09	P	CTL	M	12	39.81	17.9668	7.92105	3.66306	4.54636	7.99188	2.86232	9.08329	7.61061	2.34604	16.2966	7.09676	2.3408	16.335	8.10644	2.31034	16.3684	5.35825	2.96049	17.733	9.90277	2.87869	17.7417	5.11191	3.06858	16.8321	10.2153	3.02416	16.803	1.97163	6.26312	15.5838	13.3103	5.9508	16.0181	4.5909	3.11644	11.2606	10.8728	2.95035	11.3814	7.9035	7.37661	22.3238
F09A1F01	F09	A	LS1	F	1	26.83	19.1622	7.93448	3.50978	4.89589	8.07433	2.6437	9.13655	7.71398	2.24404	16.3219	7.19642	2.20949	16.3358	8.21476	2.21553	16.3824	5.50621	2.82184	17.6574	9.995	2.78772	17.5766	5.27552	2.87647	16.8253	10.2914	2.92567	16.7027	2.34547	6.24934	15.8019	13.2735	6.01983	15.9836	4.73142	2.85224	11.2364	10.9388	2.85483	11.2927	8.08038	7.45304	22.2525
F09A1F03	F09	A	LS1	F	3	31.19	19.1243	7.97153	3.60412	4.5231	8.02977	2.66803	9.00147	7.59924	2.15884	16.4106	7.07076	2.1511	16.4491	8.10848	2.11565	16.5047	5.3917	2.81303	17.738	9.95085	2.70748	17.6504	5.13736	2.88877	16.9105	10.2832	2.84624	16.7587	2.12054	6.47214	15.6951	13.3433	6.01102	16.1042	4.54186	2.9009	11.1789	10.8533	2.7489	11.2337	8.0296	7.46923	22.1963
F09B1F02	F09	B	LS1	F	2	34.2	17.4796	7.94527	3.2446	4.91537	8.06783	2.48946	9.40983	7.83285	2.43521	16.6383	7.32423	2.4197	16.6857	8.32989	2.41134	16.7012	5.6384	3.07501	17.7821	10.1332	3.06741	17.7941	5.38966	3.11626	16.9887	10.3981	3.17271	16.9245	2.13437	6.30568	15.7972	13.4199	5.98438	16.1824	4.73744	2.83203	11.594	10.955	2.71931	11.6249	8.11515	7.4903	22.0661
F09B1F03	F09	B	LS1	F	3	36.36	17.3176	7.94603	3.22869	4.96805	8.12411	2.36412	8.92091	7.58856	2.38878	16.4412	7.05764	2.37666	16.487	8.10744	2.34983	16.507	5.33761	3.01996	17.5597	9.94407	2.979	17.6305	5.13642	3.04533	16.7309	10.2357	3.096	16.734	2.06951	6.33207	15.5147	13.3106	6.06259	16.0387	4.6194	2.73022	11.3059	10.9087	2.66462	11.5324	7.9633	7.50504	21.7991
F09C1F01	F09	C	LS1	F	1	36.39	20.3976	8.08045	3.50998	4.54207	8.12735	2.76779	8.87867	7.66401	2.24068	16.1807	7.13453	2.21641	16.1794	8.16537	2.20506	16.2633	5.39022	2.71087	17.4928	9.96147	2.69694	17.5042	5.11258	2.7996	16.6256	10.3525	2.87469	16.6143	2.01512	6.32104	15.8265	13.4521	6.01321	16.2448	4.7213	2.87681	10.9177	10.9296	2.86532	11.037	7.98401	7.40815	22.744
F09D1F01	F09	D	LS1	F	1	30.01	20.1397	8.20939	3.4523	4.89388	8.25827	2.76172	9.1137	7.65619	2.30357	16.3043	7.13769	2.26929	16.3102	8.14482	2.26449	16.4084	5.40968	2.82344	17.6801	9.88558	2.79065	17.7936	5.14535	2.93717	16.818	10.2849	2.95472	16.8484	2.23451	6.2987	15.6051	13.2726	6.1238	16.2437	4.79967	2.95644	11.2905	11.002	2.94177	11.3934	7.87681	7.48992	22.3797
F09E1F04	F09	E	LS1	F	4	31.77	19.5546	8.03445	3.44248	4.38846	8.07989	2.6601	8.80032	7.69039	2.13941	16.3221	7.20018	2.1128	16.3433	8.1482	2.10866	16.3832	5.42735	2.74264	17.7532	9.91761	2.68011	17.8017	5.14875	2.82244	16.8299	10.2693	2.79272	16.7901	2.07497	6.33807	15.5097	13.3237	5.99046	16.1376	4.73713	2.84954	11.1606	10.8985	2.72436	11.1993	7.939	7.53871	22.6877
F09E1F05	F09	E	LS1	F	5	31.86	18.6955	8.14874	3.4974	4.82212	8.19716	2.6773	9.03139	7.69496	2.46388	16.3374	7.2282	2.44768	16.3857	8.14215	2.43514	16.4046	5.48555	3.08292	17.674	9.90263	3.02132	17.7346	5.23804	3.1432	16.8139	10.2289	3.11712	16.8338	2.165	6.45805	15.5475	13.2641	6.0829	16.0175	4.69193	2.95017	11.4298	11.0052	2.90324	11.4727	7.94606	7.50766	22.1683
F09F1F06	F09	F	LS1	F	6	35.03	19.2419	8.0825	3.75284	4.48809	8.07423	2.69626	9.09361	7.67216	2.30904	16.5454	7.15918	2.28396	16.5746	8.17097	2.28304	16.6121	5.46333	2.8462	17.7841	9.93139	2.85284	17.7948	5.21284	2.92263	16.9231	10.2873	3.04561	16.8879	2.14365	6.43261	15.6268	13.3787	5.95832	16.0398	4.75727	2.88085	11.3544	10.9062	2.84675	11.3729	7.96316	7.4542	22.3822
F09F1F08	F09	F	LS1	F	8	30.95	18.808	8.0068	3.59369	4.76658	8.13158	2.68913	9.12618	7.65039	2.27975	16.5187	7.15475	2.26696	16.5511	8.11653	2.2477	16.5731	5.40547	2.88617	17.8061	9.88937	2.83531	17.8105	5.17366	2.95835	16.9449	10.2224	2.97875	16.8994	2.22386	6.54242	15.5221	13.2337	6.12848	16.1165	4.7096	2.87449	11.5867	10.842	2.79364	11.5673	7.98065	7.36023	22.2708
F09I1F02	F09	I	LS1	F	2	32.71	20.0351	8.01651	3.69627	4.68099	8.04646	2.79602	9.13401	7.65479	2.19763	16.4462	7.17382	2.18457	16.4601	8.10224	2.15402	16.5247	5.42922	2.71244	17.8448	9.78406	2.66594	17.8849	5.19631	2.79339	16.9414	10.1448	2.81929	16.9436	2.05143	6.26628	15.7029	13.3072	5.91961	16.2197	4.78989	2.92058	11.0992	10.7826	2.81906	11.2668	7.95799	7.48718	22.6436
F09J1F01	F09	J	LS1	F	1	33.01	19.2497	8.11951	3.41103	4.49439	8.23005	2.67699	9.07817	7.7867	2.17455	16.6459	7.28403	2.14077	16.6831	8.27681	2.15498	16.7317	5.46514	2.70175	18.0509	10.1154	2.7395	18.0432	5.21015	2.72807	17.1644	10.4734	2.99525	17.0397	2.0754	6.306	16.0236	13.1497	6.16769	16.375	4.77938	2.82135	11.5168	11.1048	2.8716	11.6375	8.00357	7.23092	22.5639
F09J1F02	F09	J	LS1	F	2	32.71	19.3469	8.05645	3.83806	4.46346	8.09965	2.85761	9.07193	7.66351	2.18583	16.6912	7.17715	2.16375	16.7183	8.13211	2.15	16.7749	5.39531	2.81595	18.067	10.0094	2.74937	18.0177	5.13657	2.87329	17.1561	10.3564	2.90983	17.0805	1.98899	6.44307	15.9437	13.2329	6.19835	16.2994	4.69019	2.94329	11.4706	10.8425	2.80873	11.4348	7.87329	7.37814	22.7223
F09K1F01	F09	K	LS1	F	1	31.52	18.7971	8.08423	3.46922	4.73305	8.14712	2.58264	8.7756	7.68877	2.36248	16.3009	7.15925	2.34591	16.3471	8.21213	2.33718	16.3985	5.48586	2.98141	17.6881	9.95033	2.93614	17.7325	5.24249	3.06912	16.8728	10.2692	3.0781	16.8363	2.22901	6.27763	15.5646	13.1739	5.91722	16.0492	4.70466	2.91137	11.3735	11.0066	2.80111	11.3442	7.92196	7.53785	22.2313
F09K1F02	F09	K	LS1	F	2	35.74	19.88	7.93976	3.39248	4.47958	8.08261	2.50701	8.77453	7.61196	2.23078	16.4023	7.11271	2.20299	16.463	8.09981	2.20103	16.4892	5.45563	2.79995	17.8659	9.87504	2.78948	17.8951	5.23294	2.84721	17.0365	10.2164	2.90646	16.9662	2.00957	6.222	15.6087	13.3611	6.01301	16.0491	4.63077	2.76826	11.2369	10.9342	2.68568	11.3414	7.88537	7.55062	22.5395
F09L1F02	F09	L	LS1	F	2	41.81	19.6965	8.06362	3.37116	4.52993	8.05714	2.62779	8.86976	7.5605	2.13167	16.3097	7.06262	2.11142	16.345	8.03526	2.08927	16.3729	5.3213	2.70986	17.7597	9.84987	2.67037	17.8455	5.08535	2.77251	16.8838	10.1947	2.79417	16.8822	1.86607	6.34074	15.8313	13.3521	5.97371	16.2769	4.6186	2.82009	11.2061	10.8544	2.64769	11.3391	7.92677	7.40193	22.5977
F09M1F06	F09	M	LS1	F	6	34.61	19.4917	7.9306	3.63743	4.83107	8.04857	2.89354	9.2279	7.62826	2.49982	16.4468	7.13135	2.4685	16.4925	8.10455	2.47127	16.5043	5.38448	2.97282	17.776	9.94123	2.96052	17.7741	5.10244	3.06054	16.8775	10.2772	3.10789	16.8174	1.89259	6.48242	15.6751	13.4601	6.142	16.1267	4.5933	3.13464	11.3722	10.8709	2.95372	11.4205	8.04225	7.42776	22.4086
F09N1F01	F09	N	LS1	F	1	39.12	19.9721	7.93503	3.52669	4.56165	7.98475	2.7417	8.86295	7.58987	2.09038	16.55	7.09045	2.07942	16.5825	8.0783	2.03921	16.6194	5.43957	2.64217	17.998	9.85742	2.48596	17.9851	5.16752	2.72886	17.0879	10.1704	2.62792	17.0502	1.9334	6.20946	15.9703	13.4132	5.72729	16.2962	4.6464	2.92983	11.2584	10.6486	2.60229	11.3083	8.12298	7.38249	22.8352
F09O1F04	F09	O	LS1	F	4	29.26	19.1096	7.93784	3.45166	4.8573	8.0327	2.57495	8.80433	7.59383	2.35826	16.3259	7.116	2.32714	16.3974	8.07037	2.32021	16.3929	5.46898	2.76032	17.7467	9.95721	2.6829	17.7041	5.20086	2.7943	16.932	10.2678	2.79201	16.815	2.04825	6.34126	15.6235	13.3633	5.9482	15.873	4.58245	2.77406	11.4143	10.8824	2.6162	11.2965	8.11526	7.44795	22.2173
F09P1F06	F09	P	LS1	F	6	30.77	19.1431	7.91845	3.22901	4.79923	7.96677	2.53815	8.99556	7.48448	2.19649	16.3408	6.9932	2.16436	16.3851	7.93692	2.17292	16.4031	5.35012	2.83558	17.6614	9.62158	2.79437	17.6422	5.10152	2.87181	16.854	9.98358	2.89517	16.7547	2.22338	6.37532	15.6345	13.0419	5.94627	16.0206	4.59208	2.80612	11.2012	10.821	2.70315	11.3056	7.99446	7.4023	22.0296
F09A1M04	F09	A	LS1	M	4	32.69	18.7808	7.96723	3.51426	4.59094	8.02732	2.78949	8.99752	7.68855	2.43615	16.2755	7.15458	2.41679	16.3066	8.20874	2.3908	16.359	5.51404	2.93806	17.6128	9.99748	2.8942	17.594	5.25108	3.01124	16.7746	10.3107	3.02503	16.7291	2.12161	6.5491	15.683	13.3843	6.13619	16.1768	4.67528	3.03867	11.1972	10.9477	2.90979	11.3088	8.00679	7.50623	22.1292
F09A1M07	F09	A	LS1	M	7	36.27	19.018	7.9525	3.42864	4.64126	8.08733	2.66234	9.17449	7.59981	2.29043	16.4114	7.08706	2.26531	16.4604	8.11065	2.24566	16.4839	5.4033	2.83492	17.7254	10.004	2.79967	17.6434	5.13761	2.86303	16.8853	10.3131	2.89299	16.746	2.02471	6.25296	15.7641	13.3549	5.89776	16.1531	4.64016	2.96304	11.2395	10.8262	2.81052	11.3212	8.10444	7.36705	22.2919
F09B1M08	F09	B	LS1	M	8	38.72	17.7884	8.05241	3.69099	4.63235	8.1286	2.76219	8.98178	7.63955	2.20793	16.1799	7.12629	2.20335	16.2101	8.14969	2.16712	16.2439	5.4562	2.8253	17.4028	9.9866	2.72853	17.4813	5.21981	2.87925	16.5582	10.2875	2.83728	16.56	1.98657	6.25685	15.6372	13.4252	5.85729	16.1275	4.6992	2.95089	11.1298	10.9728	2.78235	11.1984	8.07134	7.41615	21.9345
F09B1M09	F09	B	LS1	M	9	42.01	17.8437	7.94619	3.49258	4.73632	7.94688	2.46673	9.15951	7.38505	2.34344	16.3642	6.84765	2.32072	16.3978	7.91425	2.30729	16.4509	5.19532	2.91819	17.5912	9.75175	2.87673	17.6179	4.98734	2.94785	16.7334	10.0304	2.98386	16.6898	1.89577	6.34581	15.6767	13.2218	5.88382	16.1065	4.45431	2.77366	11.1642	10.8329	2.71421	11.3516	7.9796	7.5997	21.8865
F09C1M07	F09	C	LS1	M	7	43.99	20.1712	8.03618	3.47045	4.37724	8.10966	2.82522	8.83681	7.67017	2.12549	16.207	7.13874	2.0884	16.2515	8.18646	2.07998	16.2898	5.31121	2.61554	17.7715	10.0597	2.58905	17.7495	5.06183	2.70587	16.8356	10.408	2.78906	16.6855	1.89899	6.37464	15.87	13.5688	5.97933	16.2201	4.80672	2.84565	11.1852	10.843	2.86437	11.1965	7.98279	7.44395	23.1147
F09D1M06	F09	D	LS1	M	6	41.2	20.0792	8.12153	3.35465	4.90146	8.14939	2.61648	9.03247	7.7002	2.26868	16.2298	7.20879	2.24212	16.3132	8.17089	2.231	16.288	5.42329	2.80365	17.6524	9.99982	2.74864	17.591	5.1638	2.83435	16.8024	10.3368	2.88721	16.7065	1.82836	6.40553	15.7967	13.5608	6.14445	16.0955	4.66594	2.82462	11.3918	10.9806	2.79511	11.3806	7.94543	7.46771	22.0118
F09E1M06	F09	E	LS1	M	6	37.85	19.0723	8.16282	3.3224	4.57163	8.2088	2.40563	9.0165	7.73972	2.14455	16.5124	7.23601	2.11664	16.56	8.22532	2.12458	16.5736	5.45502	2.69968	17.8092	10.0309	2.76493	17.844	5.21781	2.67081	16.9834	10.379	2.86087	16.8927	2.08369	6.09979	15.7477	13.4127	5.97624	16.1377	4.63678	2.61302	11.2748	11.125	2.58253	11.3957	7.95564	7.51095	22.4185
F09E1M08	F09	E	LS1	M	8	35.54	18.8307	8.01349	3.28429	4.76408	8.01651	2.55307	9.07784	7.56524	2.28418	16.1754	7.09312	2.27665	16.1862	8.02118	2.23872	16.241	5.32829	2.84675	17.3559	9.92425	2.78126	17.2779	5.02157	2.91683	16.5255	10.301	2.9348	16.4109	2.00152	6.56946	15.6433	13.3057	6.19571	15.9087	4.46918	2.89965	11.2219	10.9937	2.78748	11.1865	8.03767	7.35674	22.2751
F09F1M10	F09	F	LS1	M	10	37.22	18.9443	7.94301	3.62945	4.72454	8.01917	2.77494	8.97666	7.60812	2.32142	16.3022	7.07922	2.30666	16.3539	8.09692	2.29013	16.3722	5.35776	2.93659	17.6587	9.88259	2.92825	17.7019	5.12273	2.97628	16.7962	10.2312	3.07056	16.8141	2.09043	6.46492	15.6116	13.2796	6.17981	16.1672	4.68038	2.96366	11.1634	10.7339	2.9124	11.321	7.966	7.388	22.2816
F09F1M15	F09	F	LS1	M	15	37.24	19.189	8.05808	3.61035	4.50939	8.16894	2.85184	8.95225	7.65579	2.31956	16.3194	7.11463	2.30314	16.3475	8.17115	2.28317	16.3982	5.40862	2.88664	17.675	9.94849	2.85459	17.6756	5.17669	2.95088	16.792	10.2855	3.02007	16.7552	2.10057	6.44275	15.623	13.2857	6.20992	16.1164	4.81427	2.97199	11.2526	10.892	2.98922	11.3611	8.00107	7.42925	22.3163
F09I1M06	F09	I	LS1	M	6	40.84	20.4597	8.04973	3.58575	4.43901	8.06444	2.69418	9.1031	7.61211	2.03427	16.5797	7.14628	2.00478	16.6402	8.05751	1.99953	16.6455	5.37436	2.55064	18.1027	9.90515	2.48093	17.9636	5.11348	2.60194	17.1789	10.2277	2.59977	17.0046	1.84214	6.29855	15.8271	13.3842	5.90947	16.1808	4.85276	2.72605	11.3142	10.6697	2.65695	11.2804	8.07573	7.47892	22.9161
F09J1M06	F09	J	LS1	M	6	36.38	18.8515	8.15042	3.94013	4.63637	8.17239	2.998	9.00448	7.57882	2.33061	16.4666	7.07346	2.3074	16.5006	8.06742	2.29349	16.539	5.27159	2.84497	17.8396	9.94701	2.77183	17.8718	5.01514	2.93674	16.9525	10.3028	2.93633	16.9178	2.00072	6.40381	15.8931	13.2676	6.05338	16.3371	4.56162	3.15992	11.272	10.9869	2.98915	11.3514	7.97296	7.27967	22.4493
F09J1M12	F09	J	LS1	M	12	34.76	19.3268	7.92104	3.83185	4.86639	8.07968	2.80498	8.92143	7.60392	2.08383	16.5948	7.09107	2.04693	16.6494	8.08564	2.04707	16.6445	5.33135	2.58683	18.0415	9.97829	2.52389	17.9413	5.04555	2.66458	17.1178	10.3143	2.66323	16.9771	2.18161	6.39989	16.0209	13.2683	5.82751	16.3988	4.60135	2.92592	11.3759	10.8774	2.79872	11.3744	8.22992	7.22225	22.7624
F09K1M08	F09	K	LS1	M	8	39.05	20.0214	7.93152	3.41966	4.48854	7.98301	2.54485	8.81903	7.61014	2.13535	16.444	7.11832	2.10145	16.491	8.08505	2.10675	16.5252	5.35018	2.61143	18.0364	9.90604	2.61815	17.9294	5.08789	2.56623	17.1004	10.2394	2.76954	16.9303	1.84176	6.15298	15.7419	13.5586	5.8938	16.1157	4.51224	2.76844	11.1433	10.9212	2.76729	11.2264	7.96755	7.41206	22.5136
F09K1M14	F09	K	LS1	M	14	36.73	19.384	8.0003	3.58072	4.8046	8.00853	2.63606	9.03645	7.59482	2.33336	16.4226	7.09322	2.31482	16.4995	8.08887	2.30804	16.4819	5.42504	2.95295	17.8282	9.83568	2.88003	17.8237	5.17837	3.01561	16.97	10.1382	2.99699	16.8861	2.07074	6.46182	15.6067	13.2042	5.87388	15.9111	4.55798	2.96665	11.3599	10.8488	2.81787	11.3849	8.07403	7.52465	22.2733
F09L1M09	F09	L	LS1	M	9	46.25	20.3763	8.11223	3.58251	4.30131	8.1195	2.7859	8.85577	7.56233	2.08519	16.4929	7.05569	2.0553	16.5468	8.04534	2.04081	16.5798	5.21935	2.65995	18.0107	9.95565	2.557	17.9994	5.01219	2.71129	17.0208	10.2928	2.69523	16.9461	1.71074	6.51424	15.5306	13.4232	6.00518	16.2586	4.67429	2.83589	11.1564	10.8802	2.79311	11.2768	7.97616	7.53388	22.7468
F09M1M08	F09	M	LS1	M	8	38.73	19.3409	7.94132	3.57996	4.96164	8.01867	2.85703	9.09768	7.60764	2.44079	16.3291	7.12625	2.41906	16.3753	8.07598	2.40671	16.3918	5.44228	2.97855	17.6772	9.89965	2.92722	17.6937	5.18911	3.04725	16.832	10.2285	3.08038	16.7793	1.93824	6.59195	15.6344	13.5317	6.04047	16.0987	4.5669	3.13044	11.2687	10.8713	2.95022	11.4097	8.10045	7.44225	22.2621
F09N1M05	F09	N	LS1	M	5	44.81	20.1625	8.01635	3.62219	4.70655	8.10365	2.83485	8.9655	7.58166	2.02395	16.3331	7.08385	1.95651	16.3788	8.07225	1.99835	16.4437	5.51318	2.23275	18.0238	9.84012	2.30536	17.9313	5.28175	2.19601	17.1206	10.1691	2.36751	17.0191	1.8876	6.04552	15.9592	13.4137	5.70003	16.524	4.73384	2.73219	11.2743	10.8056	2.77518	11.2588	8.01232	7.32646	22.908
F09O1M06	F09	O	LS1	M	6	34.37	19.5576	7.96855	3.4231	4.92559	8.08495	2.54327	9.00627	7.70861	2.25872	16.4727	7.19028	2.24959	16.4916	8.19895	2.20643	16.541	5.40707	2.77138	17.7256	10.0565	2.67871	17.6966	5.15563	2.82625	16.8773	10.3807	2.83019	16.7985	2.02688	6.26381	15.6521	13.4546	5.95745	16.0626	4.67033	2.75098	11.4144	10.9757	2.67421	11.3893	8.06298	7.46304	22.4661
F09P1M11	F09	P	LS1	M	11	35.89	18.9887	7.85405	3.57271	4.77599	7.95717	2.70161	8.80771	7.56624	2.31106	16.1229	7.06429	2.29201	16.1312	8.04448	2.27042	16.2051	5.39209	2.87164	17.4504	9.85654	2.81131	17.483	5.13766	2.91269	16.6119	10.1928	2.90208	16.6185	2.07183	6.33464	15.5388	13.3825	5.81286	16.0046	4.48651	2.98196	11.1548	10.7941	2.76364	11.231	8.08875	7.4554	21.8968
F09A2F01	F09	A	LS2	F	1	35.76	19.7791	8.13777	3.73237	4.57032	8.1952	2.87809	9.08621	7.75618	2.28282	16.3314	7.24643	2.25468	16.3527	8.25549	2.26328	16.4191	5.57185	2.8582	17.6911	10.0199	2.87718	17.7793	5.34204	2.9112	16.8783	10.343	3.00876	16.9144	2.2069	6.33811	15.7728	13.3397	6.13614	16.354	4.86809	2.90586	11.3308	10.935	2.89672	11.394	8.03117	7.55022	22.2999
F09A2F03	F09	A	LS2	F	3	34.91	19.352	7.92359	3.65899	4.85163	8.02168	2.79684	9.34917	7.62092	2.44256	16.2858	7.09159	2.43397	16.3452	8.12051	2.40417	16.3572	5.47241	3.07159	17.7703	9.83891	2.92237	17.6882	5.22636	3.14646	16.9763	10.1668	3.04502	16.8523	2.2443	6.56621	16.0086	13.3066	6.05146	16.3481	4.71792	3.06278	11.5186	10.6921	2.8381	11.6724	8.06462	7.53592	22.1353
F09B2F02	F09	B	LS2	F	2	37.78	19.8325	8.07772	3.40356	5.01754	8.02403	2.71326	9.07715	7.65404	2.53031	16.0702	7.10821	2.51149	16.1479	8.17852	2.51451	16.151	5.35157	3.18996	17.4131	10.0054	3.18655	17.4726	5.07423	3.29559	16.6597	10.3398	3.36775	16.659	2.0024	6.62672	15.7205	13.3579	6.28295	16.1271	4.50591	3.05832	11.2099	10.9851	2.99464	11.3392	8.03575	7.60437	22.2205
F09B2F03	F09	B	LS2	F	3	29.53	18.396	8.11658	3.505	4.88668	8.13195	2.73215	9.01022	7.5733	2.44636	16.1902	7.1091	2.41961	16.1992	8.04192	2.42608	16.2756	5.4771	2.99093	17.4285	9.82073	3.00547	17.4685	5.22843	3.06449	16.6164	10.1286	3.14334	16.6024	2.25015	6.36957	15.4527	13.0985	6.03704	16.0193	4.70476	2.98189	11.2684	10.8796	2.96443	11.4057	8.0283	7.45419	21.7288
F09C2F03	F09	C	LS2	F	3	37.26	19.215	7.89539	3.48435	4.63378	8.01541	2.80696	8.97831	7.59964	2.60887	16.2527	7.12893	2.57573	16.2765	8.04687	2.58475	16.3303	5.38177	3.1193	17.6815	9.84318	3.1007	17.6962	5.14734	3.15501	16.8099	10.1436	3.20871	16.7892	2.00929	6.5106	15.5975	13.3376	6.1537	16.0944	4.62066	3.06016	11.2856	10.8841	2.97704	11.3065	8.01113	7.58078	22.2802
F09D2F02	F09	D	LS2	F	2	39.83	19.9617	7.77907	3.59861	4.35331	7.94944	2.72343	8.99222	7.55312	2.3979	16.2984	7.04713	2.38549	16.3604	8.04741	2.35759	16.3561	5.34128	3.0049	17.7028	9.82755	2.91394	17.7912	5.10998	3.06316	16.8917	10.1514	3.04105	16.9046	1.81382	6.43478	15.8008	13.4307	5.98333	16.4349	4.51033	2.84043	11.2157	10.7942	2.7926	11.2576	7.97743	7.64816	22.3748
F09D2F03	F09	D	LS2	F	3	37.78	18.755	8.11075	3.36744	4.57399	8.1435	2.59811	8.95388	7.56171	2.46757	16.4203	7.05889	2.44717	16.451	8.04895	2.43724	16.4899	5.35619	3.0172	17.6629	9.8305	2.99616	17.7157	5.11986	3.07583	16.8696	10.1609	3.15711	16.8798	2.03411	6.40929	15.7168	13.2441	6.11103	16.1945	4.62232	2.83463	11.3351	10.9862	2.8445	11.3714	7.8727	7.53788	22.2198
F09E2F05	F09	E	LS2	F	5	34.59	18.839	7.86249	3.56582	4.49102	8.00245	2.76588	8.89069	7.63207	2.5052	16.399	7.11607	2.49078	16.422	8.12144	2.47134	16.4925	5.41345	3.11917	17.7582	9.86622	3.05326	17.7995	5.16706	3.16712	16.9359	10.2068	3.17786	16.9431	2.08866	6.52812	15.9064	13.2718	6.17313	16.3027	4.68643	2.96783	11.2629	10.8764	2.93673	11.3779	7.95237	7.71576	22.3344
F09E2F06	F09	E	LS2	F	6	35.92	19.7552	7.83835	3.7401	4.51845	8.04052	2.88479	8.95013	7.58613	2.31819	16.3927	7.08623	2.29775	16.4582	8.05022	2.29107	16.4467	5.37144	2.86631	17.814	9.82933	2.83219	17.832	5.15124	2.95695	16.9596	10.1703	3.0023	16.9441	1.91367	6.45315	15.7183	13.4248	6.02941	16.2217	4.60641	2.9477	11.1578	10.7506	2.88947	11.2516	8.04073	7.5061	22.4683
F09F2F02	F09	F	LS2	F	2	39.44	19.993	8.10071	3.47457	4.57829	8.16766	2.75065	9.13087	7.68217	2.24591	16.4307	7.15822	2.20749	16.4398	8.19572	2.20437	16.513	5.40161	2.74066	17.8953	10.0795	2.70177	17.9493	5.14715	2.81437	16.9969	10.4248	2.85315	16.9732	1.96594	6.65137	15.8744	13.5656	6.16641	16.397	4.62111	2.98547	11.2829	11.1293	2.83723	11.4032	8.02786	7.43512	22.578
F09G2F01	F09	G	LS2	F	1	37.24	19.4028	8.08366	3.49483	4.73001	8.18333	2.78853	9.05431	7.71872	2.41483	16.3864	7.20819	2.39707	16.4136	8.22214	2.38418	16.4785	5.51041	2.97261	17.6828	10.0244	2.96934	17.7259	5.23047	3.01695	16.8766	10.3327	3.06403	16.8256	2.10028	6.40021	15.6133	13.3094	6.10762	16.0755	4.64535	2.97561	11.2972	11.0712	2.94943	11.4276	7.96398	7.53134	22.3356
F09G2F03	F09	G	LS2	F	3	35.2	19.3226	8.04659	3.4582	4.71264	7.97932	2.76578	9.07427	7.44769	2.4084	16.2239	6.94493	2.39067	16.2745	7.93326	2.36696	16.2906	5.29005	2.97161	17.5909	9.70786	2.84061	17.5609	5.03667	3.04625	16.7529	10.0363	2.98644	16.645	1.97109	6.4771	15.6401	13.2728	5.99154	15.9876	4.47405	3.00744	11.158	10.7696	2.90223	11.2585	7.98303	7.55463	22.3458
F09H2F01	F09	H	LS2	F	1	32.36	18.867	7.99494	3.34214	4.66637	8.08209	2.49516	8.81508	7.60146	2.37509	16.2238	7.11412	2.35419	16.2555	8.06829	2.34174	16.2839	5.41407	2.95817	17.5387	9.83127	2.90401	17.5978	5.17614	2.97424	16.7389	10.1846	3.01152	16.7233	2.13993	6.4343	15.4656	13.235	6.00597	16.0814	4.53983	2.73629	11.2008	11.0137	2.70178	11.2281	7.95681	7.57209	21.9857
F09H2F06	F09	H	LS2	F	6	31.01	18.2908	8.08026	3.4607	4.86862	8.15435	2.70883	8.767	7.707	2.46847	15.957	7.23199	2.43817	15.986	8.15913	2.44451	16.0276	5.66054	3.00722	17.2215	9.79845	2.95886	17.1803	5.47892	3.00804	16.446	10.045	3.02492	16.3196	2.57059	6.56415	15.0117	13.1301	6.08392	15.7202	4.95274	2.78614	11.2434	10.9141	2.83435	11.147	7.94062	7.49772	21.4226
F09I2F02	F09	I	LS2	F	2	36.74	20.5932	8.02526	3.52563	4.54555	8.15622	2.70725	9.14132	7.67103	2.2891	16.5387	7.17641	2.27015	16.5898	8.14493	2.25897	16.624	5.47332	2.88187	18.0611	9.87699	2.86172	18.0899	5.26034	2.91651	17.2163	10.1973	2.98382	17.2149	1.95046	6.55884	15.7158	13.4435	6.2061	16.36	4.78065	2.85367	11.458	10.8888	2.85422	11.5158	7.93876	7.52505	22.6894
F09I2F04	F09	I	LS2	F	4	33.87	18.8593	8.12559	3.63811	4.51602	8.13255	2.73862	8.89066	7.67837	2.31471	16.2423	7.21396	2.29325	16.2809	8.13342	2.28447	16.3269	5.50736	2.85149	17.7121	9.86911	2.85653	17.7008	5.28423	2.88044	16.8691	10.2305	3.0109	16.8579	2.07826	6.44189	15.5746	13.2147	6.22624	16.1682	4.75901	2.9503	11.22	10.9397	2.9455	11.3203	8.02031	7.34882	22.1821
F09K2F02	F09	K	LS2	F	2	37.71	19.6139	7.90999	3.50165	4.56756	8.00457	2.8396	9.09407	7.49212	2.53303	16.1363	6.97172	2.51183	16.1843	7.96619	2.50423	16.2121	5.22623	3.11104	17.587	9.73602	3.02744	17.5509	4.96914	3.15429	16.779	10.0418	3.19368	16.6618	2.02946	6.73074	15.6597	13.1077	6.29047	16.0008	4.49428	3.14312	11.1647	10.8016	3.00993	11.225	8.05174	7.62426	22.025
F09L2F01	F09	L	LS2	F	1	39.7	19.2828	7.96258	3.43751	4.40675	8.04997	2.70431	8.99318	7.57235	2.39495	16.4071	7.07364	2.36075	16.442	8.06167	2.37066	16.5015	5.4018	2.92445	17.9357	9.83371	2.93951	17.9674	5.14835	2.96851	17.1029	10.1476	3.06765	17.0435	1.88492	6.43868	15.9997	13.3656	6.10781	16.4972	4.60835	2.92753	11.4613	10.8382	2.86461	11.5598	7.95594	7.53415	22.3626
F09O2F02	F09	O	LS2	F	2	33.67	19.2063	8.06093	3.63905	4.787	8.14947	2.80855	9.0841	7.71632	2.40169	16.4205	7.21472	2.38784	16.449	8.2054	2.35509	16.4958	5.49101	2.98012	17.7048	10.0403	2.89013	17.7439	5.2696	3.01783	16.8201	10.3456	2.99388	16.8073	2.23487	6.4443	15.7781	13.3327	6.08422	16.2062	4.76381	2.97203	11.3082	11.0217	2.84541	11.3608	8.07951	7.46453	22.2207
F09P2F01	F09	P	LS2	F	1	35.75	19.7676	8.0297	3.78704	4.50049	8.08708	2.97083	9.11265	7.60341	2.49774	16.3983	7.11104	2.46916	16.4065	8.09449	2.46885	16.4787	5.38489	3.03879	17.6995	9.89259	3.0125	17.7319	5.15655	3.09031	16.8848	10.2308	3.1394	16.8781	2.04527	6.47078	15.7822	13.3043	6.23338	16.3473	4.60417	3.12122	11.3226	10.9669	3.07447	11.3529	7.97146	7.59877	22.2264
F09A2M06	F09	A	LS2	M	6	40.29	19.1587	7.92032	3.50088	4.7499	8.02245	2.70827	9.1148	7.74314	2.19715	16.2516	7.23808	2.17827	16.3143	8.23026	2.1683	16.3465	5.48149	2.81889	17.6828	10.0736	2.83119	17.6902	5.26051	2.82905	16.8405	10.3551	2.91334	16.7833	2.16046	6.27535	15.7697	13.4453	5.93419	16.2827	4.92297	2.78223	11.3451	10.7643	2.69052	11.3776	8.04577	7.62319	22.0168
F09A2M07	F09	A	LS2	M	7	36.22	18.8842	7.83629	3.5635	4.7961	8.06767	2.75296	9.13615	7.62254	2.31337	16.3557	7.12069	2.30386	16.4282	8.10284	2.2744	16.4305	5.39794	2.92234	17.8095	9.86241	2.81997	17.7441	5.16591	2.9291	16.9447	10.1731	2.93373	16.8284	2.13854	6.56306	15.6001	13.2762	6.02642	16.2284	4.73609	2.93506	11.3357	10.8055	2.87955	11.4475	8.09124	7.573	22.244
F09B2M06	F09	B	LS2	M	6	41.12	19.6776	8.0727	3.57175	4.75759	8.13924	2.94598	9.10077	7.72506	2.5033	16.2922	7.25481	2.48165	16.3309	8.17326	2.46976	16.3749	5.53413	3.05638	17.7372	9.90277	2.96244	17.7429	5.32427	3.10334	16.8638	10.205	3.0238	16.8735	2.28098	6.37762	15.6108	13.2925	6.10636	16.076	4.96648	3.04167	11.2146	10.9209	3.13756	11.3308	7.93528	7.4168	22.4215
F09B2M08	F09	B	LS2	M	8	37.23	19.671	8.05171	3.5294	4.7181	8.13376	2.81322	9.0229	7.67186	2.45061	16.3902	7.18653	2.41679	16.4343	8.13042	2.426	16.4602	5.46873	2.96189	17.7407	9.87333	2.96418	17.7695	5.23244	3.01249	16.9051	10.1845	3.07793	16.8824	2.04928	6.6053	15.5683	13.3208	6.28756	16.1337	4.89924	2.96158	11.304	10.7587	2.94697	11.3817	8.01093	7.42088	22.1102
F09C2M06	F09	C	LS2	M	6	45.22	20.2439	7.98238	3.46852	4.41709	8.10603	2.84684	9.1366	7.6528	2.55256	16.4015	7.13418	2.52998	16.435	8.1572	2.50857	16.4543	5.371	3.0416	17.7842	10.0412	2.99366	17.8167	5.12517	3.09951	16.9294	10.3558	3.09814	16.9213	1.84783	6.4624	15.9699	13.621	6.08789	16.3085	4.66365	3.0845	11.3711	10.873	2.96365	11.3509	8.10595	7.58168	22.4203
F09D2M05	F09	D	LS2	M	5	40.7	19.1014	7.94962	3.43589	4.69319	8.03961	2.61718	8.98588	7.65693	2.46271	16.1812	7.16133	2.43405	16.1887	8.13961	2.43735	16.2839	5.44846	2.98726	17.5683	9.90395	2.94171	17.6513	5.2229	3.03	16.7365	10.2325	3.07036	16.7943	2.1003	6.38355	15.6008	13.4038	5.9295	16.1763	4.65974	2.95002	11.1599	11.0016	2.81923	11.393	8.00122	7.47443	22.1482
F09D2M06	F09	D	LS2	M	6	37.08	19.3605	7.97328	3.6492	4.48021	8.10093	2.91182	9.04221	7.60308	2.46569	16.0445	7.09514	2.43322	16.105	8.07755	2.44041	16.1143	5.31067	3.00473	17.6205	9.88119	2.91402	17.5868	5.04613	3.04851	16.7085	10.2105	3.04389	16.7141	1.93972	6.47332	15.671	13.439	5.9565	16.298	4.58585	3.0725	11.1977	10.8946	3.01085	11.2891	7.96171	7.48388	22.1486
F09E2M12	F09	E	LS2	M	12	38.11	18.8883	7.89208	3.62476	4.68555	7.95415	2.77011	9.09054	7.47831	2.40182	16.3887	7.01048	2.36989	16.411	7.93427	2.38394	16.4913	5.26543	2.88678	17.7782	9.714	2.87364	17.7267	4.97041	2.89378	16.9829	10.026	2.96189	16.8763	1.81498	6.42966	15.6608	13.257	5.99953	16.2237	4.6543	2.88354	11.2257	10.7138	2.89025	11.3282	7.93186	7.51516	22.2437
F09E2M14	F09	E	LS2	M	14	44.27	19.5885	8.12204	3.9532	4.39073	8.12687	3.2983	8.98957	7.65075	2.72683	16.3225	7.16882	2.70027	16.3475	8.1133	2.68969	16.4085	5.40304	3.2104	17.8363	9.77623	3.11912	17.7869	5.19474	3.19695	16.9871	10.1107	3.25622	16.9001	1.91981	6.61134	15.8579	13.2961	6.21066	16.5171	4.72052	3.39946	11.0715	10.8289	3.29962	11.2228	7.87832	7.67612	22.4978
F09F2M08	F09	F	LS2	M	8	43.12	19.9874	7.94347	3.60434	4.7972	8.03436	2.87484	8.89797	7.54323	2.34094	16.3289	7.00248	2.32166	16.3888	8.06791	2.29547	16.4113	5.25661	2.91177	17.8236	9.92451	2.78448	17.7741	5.02563	2.99251	16.9342	10.2503	2.92982	16.8275	1.96807	6.5636	15.923	13.4334	6.0965	16.2028	4.57221	3.07499	11.2354	10.9223	2.93908	11.2519	8.04034	7.39536	22.6643
F09G2M05	F09	G	LS2	M	5	41.66	19.6176	7.92334	3.73704	4.65421	8.04361	3.02213	8.94657	7.55685	2.60757	16.1479	7.02935	2.58026	16.2093	8.06007	2.56664	16.2139	5.31904	3.07412	17.5725	9.87493	3.05722	17.5138	5.07634	3.13523	16.7317	10.1934	3.20246	16.5655	1.99972	6.53439	15.6224	13.3246	6.17418	15.8999	4.60055	3.17316	11.1275	10.8535	3.13895	11.1403	8.08451	7.49373	22.2704
F09G2M06	F09	G	LS2	M	6	41.55	20.0895	8.00004	3.57426	4.41542	8.01906	2.77117	9.01696	7.59546	2.25643	16.2335	7.0635	2.21738	16.2691	8.12012	2.23086	16.3158	5.30753	2.75315	17.6401	9.99922	2.74934	17.6301	5.04119	2.76456	16.7964	10.2944	2.83081	16.7305	1.88146	6.47854	15.4941	13.5463	6.0485	16.0759	4.67352	3.02163	11.0914	10.9059	2.91859	11.2749	8.02614	7.55417	22.2988
F09H2M07	F09	H	LS2	M	7	43.09	19.0316	7.94535	3.56979	4.65282	8.18292	2.60626	8.9581	7.73193	2.42299	16.1166	7.24569	2.41057	16.155	8.19256	2.37752	16.1994	5.49274	2.97016	17.563	9.93057	2.81994	17.6143	5.27335	2.98222	16.747	10.2857	2.87679	16.7678	2.24214	6.26072	15.6913	13.2545	5.91323	16.2836	4.62694	2.88825	11.0359	11.0192	2.74363	11.2215	8.06384	7.61238	22.0935
F09H2M08	F09	H	LS2	M	8	46.29	19.3537	7.94272	3.4477	4.88457	8.03117	2.68124	8.98796	7.50033	2.33224	16.1295	6.98484	2.31506	16.188	7.98702	2.29087	16.197	5.27899	2.94281	17.638	9.7937	2.84515	17.5169	5.05193	2.96653	16.791	10.0627	2.95973	16.6161	1.92533	6.49885	15.6187	13.2498	6.09215	15.9343	4.48208	2.91777	11.2878	10.8552	2.80757	11.3335	8.07741	7.43241	22.053
F09I2M01	F09	I	LS2	M	1	32.99	18.5324	8.06015	3.77428	4.74678	8.10403	2.95763	9.06599	7.65159	2.50017	16.0697	7.19333	2.48029	16.0877	8.10727	2.46268	16.1502	5.42415	3.04845	17.4117	9.92358	3.01686	17.4994	5.20084	3.11425	16.6099	10.2452	3.15924	16.6338	2.22383	6.44346	15.41	13.2278	6.09738	15.94	4.73631	3.14126	11.1741	10.8801	3.10824	11.3218	7.9628	7.56234	21.8773
F09I2M06	F09	I	LS2	M	6	37.08	19.6677	7.86619	3.32798	4.753	8.03882	2.56251	9.08186	7.63817	2.25671	16.3613	7.13095	2.24436	16.4198	8.12467	2.22773	16.4534	5.45552	2.82865	17.6933	9.84876	2.78222	17.7379	5.2261	2.88102	16.8773	10.1613	2.91168	16.8582	2.17272	6.1982	15.6857	13.1935	5.85327	16.0721	4.57035	2.88544	11.2545	10.9609	2.84879	11.3105	8.01525	7.41551	22.3202
F09K2M03	F09	K	LS2	M	3	44.18	20.3405	8.05605	3.49436	4.25511	8.06423	2.80441	8.61587	7.59433	2.35291	15.9851	7.09842	2.31412	16.0004	8.0663	2.33767	16.0948	5.28625	2.86757	17.5219	9.86822	2.87676	17.5193	5.07603	2.8988	16.6481	10.1925	2.9957	16.6531	1.90692	6.25624	15.8309	13.3558	6.07685	16.3236	4.48769	2.98753	10.9665	10.9571	2.99162	11.0386	7.99931	7.54116	22.235
F09L2M05	F09	L	LS2	M	5	42.41	19.1738	7.91131	3.34692	4.67377	7.99146	2.554	8.99809	7.50426	2.39446	16.2929	6.99555	2.38295	16.3561	8.00104	2.35986	16.3756	5.35596	2.97407	17.7198	9.76552	2.89108	17.7255	5.12813	3.01941	16.8802	10.0807	3.02487	16.8688	2.02654	6.41541	15.7996	13.2908	6.0075	16.1716	4.64416	2.87154	11.2868	10.7621	2.78661	11.4145	8.08651	7.44228	22.318
F09O2M06	F09	O	LS2	M	6	46.27	20.5045	8.00259	3.58345	4.46729	8.08562	2.83917	8.99299	7.51558	2.32055	16.4952	6.97375	2.30695	16.5346	8.03973	2.27793	16.5774	5.22742	2.96906	18.0032	9.86222	2.80046	17.9699	4.98803	3.00646	17.1184	10.1768	2.92288	17.0478	1.8648	6.65761	16.0747	13.4741	6.05322	16.4425	4.52142	3.10193	11.3458	10.8611	2.84924	11.4667	8.10079	7.5809	22.6542
F09P2M08	F09	P	LS2	M	8	38.18	19.6262	7.91083	3.74767	4.54143	8.07433	2.92795	9.10665	7.64219	2.36547	16.2626	7.13902	2.3422	16.295	8.12772	2.33118	16.3483	5.42382	2.90293	17.6997	9.89322	2.87198	17.7053	5.19586	2.91339	16.8985	10.2276	2.97441	16.8476	1.99605	6.40608	15.8019	13.4147	6.10453	16.2085	4.73765	3.06258	11.323	10.8771	2.97944	11.4116	7.92436	7.43428	22.1445
F20ACF01	F20	A	CTL	F	1	59.92	20.3659	7.9715	3.52373	4.5051	8.13629	2.83893	8.95701	7.6334	2.24173	16.4695	7.11143	2.19809	16.5112	8.10571	2.2008	16.5657	5.46189	2.83787	18.0285	9.97399	2.83509	18.2452	5.18284	2.88339	17.1847	10.342	3.01554	17.1333	1.47416	6.32622	16.2802	13.6899	6.11459	16.6156	4.60141	2.97645	11.1949	11.2432	3.01648	11.3519	7.87657	7.5595	23.3095
F20ACF02	F20	A	CTL	F	2	51.39	20.2742	7.89397	3.45635	4.5107	8.13277	2.93068	8.86574	7.56436	2.36381	16.6624	7.05198	2.32593	16.6961	8.09	2.33727	16.7205	5.20842	2.89252	18.1783	10.0241	2.92488	18.0642	4.95355	3.05872	17.3855	10.3354	3.06184	17.1832	1.74237	6.35767	16.3508	13.8	6.3777	16.2835	4.45982	3.09468	11.3743	10.9314	3.09347	11.2214	8.04124	7.52615	23.1827
F20CCF04	F20	C	CTL	F	4	44.16	19.4677	7.89543	3.76575	4.40409	7.97123	3.20967	8.81361	7.51038	2.75797	16.0833	7.07554	2.72821	16.1178	7.92277	2.73412	16.1564	5.36711	3.27229	17.4716	9.62088	3.24874	17.5259	5.13079	3.35961	16.6797	10.0209	3.43041	16.7243	1.93458	6.65599	15.2648	13.2055	6.35577	16.0432	4.60016	3.33227	10.8919	10.7186	3.34371	10.9993	7.81694	7.73792	22.3011
F20CCF06	F20	C	CTL	F	6	34.76	18.1208	8.07713	3.18795	4.61991	8.15247	2.37318	9.10496	7.65896	2.326	16.4172	7.13898	2.30008	16.4597	8.18078	2.31663	16.4706	5.40573	2.97748	17.6418	9.98544	3.03016	17.5574	5.15687	2.97666	16.8089	10.2636	3.16388	16.6999	1.98136	6.51604	15.5587	13.4466	6.19936	16.1702	4.49294	2.86276	11.2372	11.1486	2.88678	11.4594	7.88659	7.57569	22.1665
F20DCF05	F20	D	CTL	F	5	52.63	18.8325	8.15602	3.55799	4.68323	8.20146	2.81765	9.07862	7.63184	2.56077	16.3967	7.18597	2.52936	16.4394	8.06672	2.52558	16.465	5.55359	2.91046	17.8633	9.79194	3.0215	17.9374	5.29991	2.96116	17.0629	10.1232	3.21133	17.0428	1.79696	6.1877	15.9867	13.42	6.1079	16.3413	4.92397	2.98335	11.1516	10.877	3.03614	11.272	7.81163	7.58209	22.8102
F20ECF02	F20	E	CTL	F	2	30.97	17.1296	7.88897	3.38889	4.75282	8.07226	2.75831	8.88236	7.62514	2.5858	16.3132	7.13803	2.58681	16.3472	8.09338	2.54241	16.3843	5.48062	3.20464	17.4637	9.88288	3.23712	17.4095	5.21064	3.24324	16.6626	10.2119	3.38611	16.5181	1.98151	6.44001	15.5097	13.1753	6.18661	16.062	4.69186	3.05762	11.2959	10.8579	2.98721	11.3282	7.74994	7.70749	21.7273
F20ECF06	F20	E	CTL	F	6	36.33	18.4375	8.1886	3.49599	4.55466	8.04677	2.84901	8.75303	7.56625	2.50768	16.1654	7.10136	2.44815	16.2007	8.05267	2.49763	16.2228	5.56277	2.98305	17.5006	9.83433	3.17516	17.556	5.23449	3.15042	16.6717	10.1254	3.28176	16.662	1.81945	6.52771	15.5492	13.3409	6.4085	16.0879	4.49534	3.13356	11.0159	10.9693	3.16236	11.0601	7.81668	7.89578	22.3562
F20FCF05	F20	F	CTL	F	5	31.43	16.4913	7.65098	3.77369	4.51015	7.90379	3.02132	8.76317	7.51016	2.69086	16.2092	7.03488	2.67056	16.2189	7.98434	2.65518	16.2958	5.34687	3.23083	17.3987	9.85349	3.35041	17.435	5.1558	3.31432	16.4652	10.0628	3.46521	16.581	2.20418	6.55538	15.5114	13.0674	6.34607	15.7907	4.41911	3.33027	11.1803	10.9443	3.25041	11.4081	7.99163	7.64164	21.7804
F20GCF04	F20	G	CTL	F	4	24.07	16.5769	8.09242	3.49736	4.94957	8.17559	2.87224	9.05891	7.75823	2.83266	16.0419	7.31907	2.80553	16.0835	8.17419	2.8234	16.1098	5.697	3.38409	17.2419	9.84364	3.45211	17.2475	5.44353	3.35862	16.5542	10.1852	3.55837	16.4821	2.34228	6.61005	15.1019	13.1633	6.50545	15.6243	4.91697	3.19162	11.3183	10.9386	3.30413	11.4161	7.85768	7.66788	21.2908
F20GCF08	F20	G	CTL	F	8	30.8	18.6213	8.02946	3.62827	4.81199	8.01142	2.97557	9.08094	7.61752	2.64821	16.118	7.19702	2.59082	16.1234	8.04403	2.61536	16.1943	5.35145	3.20703	17.4581	9.68302	3.07667	17.6279	5.19317	3.30178	16.6104	10.0714	3.24708	16.7795	1.82775	6.47775	15.5493	13.3241	5.86921	16.2021	4.64801	3.12853	11.1219	10.9201	3.11023	11.326	7.89696	7.64669	22.2199
F20HCF06	F20	H	CTL	F	6	25.92	17.6968	8.0575	3.60316	4.82748	8.18386	2.82083	9.11503	7.77378	2.64576	16.1654	7.32731	2.6282	16.1935	8.20534	2.61656	16.2398	5.67881	3.19191	17.4242	9.90676	3.20693	17.4019	5.41281	3.23427	16.628	10.2354	3.39875	16.5355	2.18784	6.44928	15.3894	13.3102	6.44455	15.7108	4.77948	3.1168	11.2073	11.0778	3.08146	11.2729	7.88576	7.59038	22.0132
F20HCF09	F20	H	CTL	F	9	36.78	17.6034	8.07157	3.40761	4.54645	8.08055	2.69736	9.01889	7.62278	2.46671	16.2286	7.17473	2.43736	16.2415	8.0568	2.45905	16.3199	5.35842	3.15217	17.5253	9.86949	3.20197	17.5559	5.16486	3.18015	16.7062	10.153	3.30417	16.6717	1.91728	6.66696	15.4491	13.2197	6.33998	15.9198	4.35268	3.0233	11.0814	11.0445	2.95588	11.282	7.77949	7.60192	22.3434
F20JCF03	F20	J	CTL	F	3	36.63	18.3447	7.88659	3.70255	4.80724	7.98993	3.00283	8.97524	7.62025	2.5407	16.2218	7.19769	2.49298	16.2186	8.027	2.51747	16.3061	5.43782	3.06311	17.5605	9.75826	3.06423	17.7408	5.23679	3.156	16.7571	10.0893	3.19707	16.8534	1.8465	6.69123	15.3651	13.3936	6.29102	16.1106	4.7681	2.94232	11.0356	10.8297	3.16595	11.2123	7.76636	7.545	22.4511
F20KCF04	F20	K	CTL	F	4	28.73	17.2836	8.02118	3.61979	4.85131	8.14235	2.79121	9.10252	7.62105	2.72826	16.224	7.08907	2.70856	16.2764	8.11891	2.70788	16.2663	5.44469	3.30481	17.3836	9.80415	3.29015	17.3618	5.19529	3.34828	16.5746	10.1561	3.48004	16.4978	2.17172	6.62127	15.4106	13.079	6.36625	15.9678	4.71366	3.10151	11.2103	10.9956	3.17567	11.2944	7.83631	7.55753	21.7803
F20LCF08	F20	L	CTL	F	8	46.89	19.3032	8.05979	3.3648	4.60122	8.14867	2.63051	8.84851	7.73725	2.48252	16.5126	7.26983	2.45149	16.5576	8.16914	2.47285	16.5894	5.46238	3.09237	17.901	9.84192	3.11821	18.0718	5.22364	3.15653	17.0458	10.2052	3.20174	17.1602	1.79019	6.48317	15.6599	13.5454	6.31405	16.2019	4.74142	2.82236	11.1153	10.9819	2.95902	11.331	7.80144	7.57344	22.443
F20MCF01	F20	M	CTL	F	1	50.33	18.9444	8.12271	3.28414	4.86227	7.99651	2.68635	9.01956	7.57934	2.38256	16.3809	7.08115	2.36446	16.3881	8.06499	2.34193	16.4441	5.15873	3.02762	17.6971	9.99855	3.13948	17.7843	4.97429	3.11366	16.7683	10.3093	3.32843	16.8746	1.56058	6.55854	15.7086	13.5194	6.31636	16.3203	4.4211	2.97465	11.3655	11.008	3.02899	11.4642	7.77134	7.56806	22.5766
F20NCF03	F20	N	CTL	F	3	55.85	19.189	8.3083	3.43345	4.36255	8.293	2.70908	8.60303	7.73066	2.27129	16.317	7.23148	2.25792	16.3307	8.20732	2.23387	16.3853	5.53378	2.88371	17.6	9.90945	2.91648	17.7337	5.32614	2.88382	16.7584	10.2212	2.97917	16.8235	1.77309	6.40318	15.7269	13.5028	6.07281	16.2692	4.68733	2.84479	10.8535	11.0905	2.86896	11.189	7.80663	7.58777	22.5835
F20NCF05	F20	N	CTL	F	5	40.09	18.6685	8.20018	3.35393	4.63658	8.17049	2.62969	8.86807	7.7028	2.4122	16.4431	7.24152	2.41729	16.4876	8.14022	2.3803	16.4986	5.4309	3.16648	17.7049	9.88149	2.83216	17.7471	5.18598	3.28348	16.7721	10.3675	3.13273	16.7603	1.89242	6.35823	15.792	13.5061	6.15893	16.1736	4.59189	3.09655	11.232	10.998	2.85958	11.1244	7.90488	7.60516	22.3473
F20OCF02	F20	O	CTL	F	2	58.14	18.8017	7.97993	3.37666	4.50603	7.94535	2.65465	8.82483	7.55209	2.40278	16.4288	7.09912	2.36177	16.4568	7.97043	2.3806	16.4863	5.18285	3.09482	17.6959	9.83264	3.10559	17.933	4.97634	3.16855	16.8858	10.1573	3.21857	17.0232	1.6725	6.4797	15.7005	13.4933	6.3154	16.3825	4.52965	2.9255	11.1933	10.8433	2.90481	11.3123	7.9149	7.72609	22.6216
F20OCF04	F20	O	CTL	F	4	46.7	18.4379	8.33604	3.27082	4.31323	8.16939	2.68572	8.77186	7.67126	2.34289	16.1851	7.14211	2.3415	16.256	8.16783	2.31329	16.2502	5.17727	3.07167	17.6516	9.77412	2.9844	17.606	4.96933	3.19833	16.7075	10.1788	3.17503	16.7345	1.74299	6.48104	15.626	13.5446	6.19752	16.2748	4.49142	2.97598	11.0179	10.9368	2.90977	11.2554	7.76848	7.58838	22.5929
F20ACM06	F20	A	CTL	M	6	47.89	19.1413	7.9316	3.39406	4.54187	8.07136	2.51862	8.76662	7.60084	2.20936	16.3177	7.07326	2.19669	16.3722	8.09848	2.17469	16.3797	5.24723	2.84486	17.6833	9.95467	2.78027	17.6236	5.03595	2.9014	16.8588	10.2754	2.91705	16.7401	1.86578	6.48366	15.7335	13.2723	6.05487	16.2179	4.47567	2.83098	11.2615	10.9223	2.69331	11.1951	7.8965	7.53939	22.2705
F20ACM09	F20	A	CTL	M	9	43.36	18.9194	8.17935	3.4484	4.63089	8.22305	2.66128	9.03906	7.70677	2.37499	16.3311	7.16426	2.36279	16.364	8.24534	2.35073	16.4125	5.33491	2.99785	17.6338	10.079	3.03247	17.71	5.10996	3.05076	16.7514	10.3567	3.15905	16.7853	1.81762	6.58515	15.4346	13.354	6.37153	16.042	4.51141	3.06003	11.3093	11.1395	2.94649	11.3652	7.83694	7.65262	22.2943
F20CCM07	F20	C	CTL	M	7	38.02	17.9446	8.08747	3.64578	4.68456	8.18009	2.8666	9.10826	7.64118	2.55917	16.2301	7.11274	2.53374	16.2668	8.15348	2.54201	16.3068	5.38142	3.08471	17.4962	9.93336	3.1341	17.5238	5.15546	3.10223	16.6886	10.233	3.28164	16.6419	2.04915	6.31284	15.5942	13.0983	6.13382	16.0968	4.71124	3.06436	11.2226	11.0098	3.16932	11.3698	7.86826	7.63502	21.9825
F20CCM10	F20	C	CTL	M	10	40.56	18.2844	8.16365	3.59529	4.35604	8.22273	2.92616	8.97741	7.77057	2.60847	16.3027	7.2563	2.59125	16.2998	8.2721	2.58325	16.3823	5.518	3.11217	17.512	10.0486	3.23067	17.6605	5.27305	3.09109	16.6831	10.3724	3.33657	16.7811	2.02448	6.34051	15.8744	13.4804	6.28113	16.308	4.73654	3.07771	11.2404	11.0883	3.08843	11.3783	7.83738	7.6593	22.2038
F20DCM11	F20	D	CTL	M	11	38.26	17.8499	7.91472	3.61458	4.78892	7.94333	2.74898	8.99572	7.47847	2.58925	16.1387	6.98178	2.57193	16.1816	7.95746	2.55462	16.2423	5.32381	3.17738	17.5957	9.64211	3.08051	17.6076	5.09552	3.19207	16.7407	9.96638	3.16248	16.6995	1.92547	6.37287	15.6718	13.3197	6.07313	16.1671	4.54514	3.01059	11.0865	10.8415	3.00661	11.2207	7.85641	7.62884	22.1893
F20DCM13	F20	D	CTL	M	13	35.5	17.0755	7.96362	3.50984	4.83384	7.97841	2.99061	9.16318	7.54299	2.9221	16.333	7.00617	2.9194	16.385	8.05643	2.88552	16.3952	5.3381	3.46934	17.4592	9.74583	3.37049	17.5376	5.09253	3.57969	16.6578	10.0886	3.5123	16.6941	1.99354	6.62341	15.7901	13.1384	6.32315	16.2568	4.60622	3.36138	11.454	10.8276	3.28723	11.5087	7.89203	7.68459	21.8342
F20ECM13	F20	E	CTL	M	13	38.64	17.7679	8.00352	3.52313	4.76335	8.10163	2.81276	8.948	7.71496	2.55592	16.2552	7.24645	2.515	16.3037	8.17041	2.53881	16.3307	5.56235	2.9814	17.5745	9.94888	3.12658	17.6657	5.36493	2.96088	16.7238	10.2314	3.20091	16.7094	1.99534	6.36597	15.6061	13.2903	6.24982	16.1633	4.70551	3.02974	11.2794	10.9544	3.0729	11.4035	7.79567	7.72239	21.8997
F20ECM14	F20	E	CTL	M	14	38	17.1123	7.92546	3.60947	4.72342	8.04539	2.66082	9.01112	7.65461	2.47962	16.2648	7.19459	2.47576	16.3052	8.09335	2.44998	16.3474	5.60992	3.06405	17.5702	9.86197	3.06283	17.6575	5.41675	3.03578	16.817	10.1576	3.09102	16.8066	2.07533	6.35975	15.7437	13.4809	6.04709	16.1131	4.75032	2.9297	11.2551	10.8317	2.8815	11.235	7.88035	7.63205	21.9893
F20FCM09	F20	F	CTL	M	9	46.78	18.5019	7.95947	3.50746	4.50285	8.04998	2.86349	8.78203	7.60308	2.31567	16.1524	7.2109	2.27467	16.1448	8.00215	2.24863	16.246	5.67981	2.68161	17.5294	9.74675	2.76027	17.8045	5.45117	2.74492	16.6477	10.129	2.8218	16.9271	1.76554	6.14467	15.9387	13.6499	6.1143	16.3626	4.20486	3.17674	10.8717	10.9374	2.96849	11.0538	7.85195	7.69879	22.8761
F20FCM12	F20	F	CTL	M	12	34.76	16.8584	8.04576	3.64042	4.95866	8.12362	2.9553	9.00208	7.81512	2.75151	16.2543	7.30724	2.725	16.2847	8.29261	2.74186	16.323	5.52127	3.3548	17.4264	10.0179	3.33703	17.5031	5.2957	3.4486	16.5433	10.3001	3.46	16.6199	2.23229	6.4897	15.5255	13.4872	6.39219	15.8611	4.73831	3.2935	11.2874	11.0794	3.26253	11.3703	7.89455	7.59251	21.6442
F20FCM14	F20	F	CTL	M	14	42.23	17.7999	8.16601	3.76917	4.74296	8.16081	3.02805	8.93085	7.7211	2.43182	16.2824	7.21652	2.41721	16.3098	8.19504	2.40157	16.3735	5.51999	2.971	17.6162	9.94129	2.98966	17.7298	5.26742	2.99014	16.7799	10.246	3.08983	16.7872	2.0005	6.30432	15.6551	13.2849	6.09092	16.2203	4.69983	3.13417	11.2606	11.0095	3.11345	11.375	7.81151	7.52997	22.2587
F20GCM16	F20	G	CTL	M	16	29.74	16.6253	7.93957	3.86882	4.99556	8.08912	3.12892	8.99011	7.6149	2.88375	15.9458	7.15104	2.86506	15.974	8.06296	2.86127	16.0141	5.50144	3.39823	17.0543	9.73689	3.40175	17.0874	5.26249	3.38446	16.3404	10.0342	3.46727	16.3459	2.35618	6.5375	15.203	12.9725	6.24276	15.7995	4.76196	3.39972	11.3072	10.8226	3.41079	11.3949	7.82309	7.62881	21.0684
F20ICM09	F20	I	CTL	M	9	34.94	19.8464	8.05674	3.92889	4.82108	8.15142	3.10132	8.86665	7.63979	2.68503	15.9462	7.1298	2.65388	15.9828	8.14789	2.65195	16.0173	5.42708	3.13726	17.345	9.98536	3.16713	17.333	5.22972	3.20796	16.5058	10.2454	3.34763	16.4316	1.98598	6.41305	15.4362	13.3297	6.2121	15.9751	4.84823	3.1621	11.1221	10.8171	3.16384	11.2521	7.87543	7.68795	21.9174
F20JCM07	F20	J	CTL	M	7	40.6	18.278	7.7057	3.76674	4.5202	7.82712	3.02193	8.81469	7.39686	2.56301	16.3095	6.91986	2.52746	16.3473	7.84134	2.53201	16.3757	5.37584	3.03074	17.7568	9.57337	2.96305	17.7601	5.07594	3.16771	16.9575	9.92905	3.1114	16.8024	1.66291	6.48025	16.0177	13.351	6.09569	16.227	4.30162	3.2167	10.9794	10.7005	3.03127	10.9853	7.93509	7.6186	22.5247
F20JCM11	F20	J	CTL	M	11	38.78	17.6411	7.97257	3.39308	4.60879	8.00579	2.6151	8.86684	7.51553	2.37706	16.2843	7.07463	2.34696	16.318	7.95166	2.35515	16.367	5.55021	2.69888	17.5042	9.80014	2.95127	17.6277	5.32188	2.60199	16.8175	10.0618	2.94355	16.7291	1.69305	6.27787	15.6918	13.5372	6.20089	15.9487	4.5265	2.88445	11.0796	10.8576	2.84185	11.1759	7.97947	7.43186	22.1061
F20KCM08	F20	K	CTL	M	8	35.65	17.9314	8.0435	3.58814	4.75505	8.04442	2.74047	9.00679	7.58528	2.5582	16.1624	7.04045	2.54029	16.18	8.11202	2.53915	16.2332	5.25296	3.23371	17.3647	9.79621	3.12171	17.4373	5.13058	3.20891	16.5527	10.1095	3.21487	16.6195	2.12975	6.39978	15.6198	13.1228	6.04895	16.2912	4.42171	3.16356	11.1585	11.0283	3.03037	11.4432	7.94394	7.59633	22
F20KCM15	F20	K	CTL	M	15	32.32	16.6557	8.15251	3.58477	4.7918	8.2404	2.69078	9.05387	7.67587	2.60707	16.1489	7.19663	2.59108	16.177	8.14732	2.57922	16.2179	5.49441	3.20401	17.3113	9.85787	3.25165	17.279	5.25754	3.25185	16.5089	10.1528	3.33769	16.4633	2.26752	6.15245	15.4438	12.9801	6.02553	15.9389	4.71083	3.00432	11.1849	11.0111	3.02912	11.3702	7.78678	7.64271	21.4949
F20LCM10	F20	L	CTL	M	10	36.31	17.6242	8.14326	3.50205	4.67565	8.17524	2.62729	9.10758	7.63868	2.50772	16.2074	7.14377	2.4716	16.2717	8.14119	2.50314	16.2997	5.40558	3.09763	17.6508	9.94107	3.16194	17.6562	5.12049	3.02736	16.8172	10.2119	3.26626	16.7358	1.92598	6.40335	15.5552	13.2545	6.21558	16.0903	4.69838	2.96494	11.2819	11.0098	2.96861	11.4578	7.84236	7.56086	22.0563
F20LCM13	F20	L	CTL	M	13	37.4	18.4018	8.16621	3.41382	4.63917	8.19653	2.66633	8.80066	7.58881	2.5067	16.228	7.0945	2.48996	16.2828	8.07086	2.48511	16.3152	5.30013	3.04848	17.6032	9.79748	3.06941	17.6074	5.03413	3.15708	16.6959	10.089	3.18263	16.7423	1.68465	6.28969	15.6434	13.4134	6.15769	16.2215	4.50631	3.02833	11.1723	10.971	2.97408	11.255	7.68217	7.52423	22.0588
F20NCM06	F20	N	CTL	M	6	49.66	19.0419	8.0707	3.51962	4.33364	8.00434	2.71565	8.72394	7.60418	2.32347	16.0648	7.1349	2.31603	16.1011	8.05427	2.28345	16.1587	5.37092	2.91232	17.6137	9.8847	2.87685	17.7364	5.1255	2.96449	16.7561	10.2983	3.05838	16.8234	1.55337	6.34122	15.6771	13.6227	6.10346	16.2793	4.48881	2.98645	10.8239	10.9352	2.93416	11.1028	7.87138	7.64627	22.6831
F20A1F03	F20	A	LS1	F	3	30.43	19.6278	7.80712	3.51031	4.79187	8.06855	2.91673	8.83155	7.51092	2.55337	16.1074	7.02159	2.51636	16.1192	7.98533	2.51421	16.1665	5.31639	3.1493	17.3994	9.90507	3.0886	17.4357	5.1295	3.23732	16.5407	10.2495	3.25426	16.5903	2.07976	6.51638	15.3759	13.2058	6.0484	16.0202	4.51345	3.18554	11.1181	10.853	3.11207	11.1693	7.95613	7.51025	22.1119
F20A1F04	F20	A	LS1	F	4	28.45	19.9422	7.94624	3.82034	4.87789	7.96662	3.10266	9.17515	7.56485	2.63355	16.1887	7.08112	2.60773	16.1886	8.03164	2.59796	16.2757	5.37814	3.08024	17.4185	9.79558	3.03813	17.5423	5.11298	3.16186	16.5181	10.153	3.20017	16.6329	2.03944	6.41296	15.544	13.1417	6.07567	16.032	4.57244	3.26969	11.1284	10.8751	3.17109	11.2463	7.92423	7.506	22.2658
F20A1F06	F20	A	LS1	F	6	29.68	20.5177	7.99148	3.64159	4.68173	8.06021	2.87864	9.01768	7.6325	2.36285	16.2948	7.15627	2.34938	16.3294	8.07985	2.3204	16.3698	5.46605	2.90477	17.6565	9.80129	2.81707	17.7217	5.20909	2.99893	16.7577	10.1415	2.9646	16.7121	2.2434	6.52346	15.5674	13.1133	5.92931	16.1505	4.71254	3.10338	11.3274	10.9191	2.99653	11.2499	7.93386	7.45416	22.5618
F20B1F02	F20	B	LS1	F	2	28.13	20.3984	7.58692	3.73459	4.8346	7.85797	2.9495	9.07209	7.30821	2.56572	16.2362	6.91033	2.53048	16.2698	7.67381	2.51162	16.2822	5.325	2.87127	17.6288	9.3183	2.64416	17.4718	5.01932	3.12645	16.7688	9.87118	3.09889	16.6352	2.0115	6.56601	15.2403	13.0406	6.19846	15.5698	4.71538	3.17189	11.1284	10.2591	2.979	11.2284	7.95701	7.69548	22.5089
F20B1F04	F20	B	LS1	F	4	37.85	20.3749	8.03682	3.70394	4.95629	8.07313	2.9512	9.13681	7.55705	2.61547	16.2988	7.08421	2.58107	16.3647	8.01965	2.57952	16.355	5.42403	3.08093	17.7632	9.7679	3.0641	17.6995	5.17185	3.16294	16.9237	10.0753	3.23247	16.836	2.0462	6.63289	15.4665	13.1425	6.4207	15.7945	4.7447	3.19248	11.3701	10.7353	3.13152	11.3622	7.7638	7.58027	22.4347
F20D1F01	F20	D	LS1	F	1	32.77	20.6262	8.24918	3.47691	4.48235	7.98944	2.73065	9.15628	7.65506	2.23074	16.4921	7.11282	2.15668	16.5293	8.20602	2.23746	16.5863	5.43587	2.81929	18.0471	10.0334	2.94583	18.0409	5.18504	2.81986	17.1897	10.2612	3.02158	17.1189	2.06786	6.16339	16.179	13.2656	6.1973	16.4489	4.54948	2.98973	11.4148	10.8733	2.82582	11.6301	7.84752	7.57071	22.573
F20D1F03	F20	D	LS1	F	3	30.65	20.6753	7.91258	3.5827	4.52626	7.92168	2.78017	9.13305	7.63882	2.23611	16.5222	7.10155	2.19061	16.564	8.17539	2.23437	16.6091	5.49145	2.79402	18.0639	10.0054	2.89146	18.0493	5.21114	2.79643	17.1929	10.2462	3.04077	17.0777	1.99289	6.2946	16.0545	13.217	6.16489	16.4313	4.53723	2.92979	11.3166	10.8321	2.84202	11.5627	7.87581	7.5635	22.5563
F20D1F04	F20	D	LS1	F	4	36.79	22.0184	7.85449	3.50956	4.47632	7.97052	2.85988	8.95249	7.54024	2.19802	16.5154	7.07594	2.16449	16.5706	7.98067	2.16253	16.5685	5.27886	2.68431	18.0655	9.85396	2.65745	18.0845	5.02568	2.76051	17.1332	10.2063	2.84207	17.0896	1.57827	6.46825	15.8023	13.6474	6.17305	16.1827	4.69244	3.00419	11.0201	10.6755	2.88563	11.0827	7.97861	7.53147	23.1449
F20D1F05	F20	D	LS1	F	5	32.44	19.9801	7.78813	3.60943	4.92114	7.8675	2.85224	9.15744	7.48343	2.6457	16.4214	6.98841	2.63791	16.4903	7.96009	2.61151	16.4882	5.29639	3.22601	17.7658	9.75717	3.13605	17.744	5.05683	3.29568	16.9054	10.0572	3.31845	16.8207	2.02523	6.64739	15.6343	13.1103	6.29355	15.8664	4.66381	3.14087	11.362	10.5758	2.97836	11.4282	8.00307	7.51418	22.1199
F20G1F02	F20	G	LS1	F	2	40.26	22.5945	7.9441	3.59791	4.48872	8.03122	2.84919	8.94815	7.51952	2.22646	16.557	6.99731	2.19173	16.5957	8.03155	2.19477	16.6483	5.19791	2.70283	18.1628	9.9107	2.69945	18.1297	4.93373	2.8557	17.2369	10.2552	2.93971	17.1788	1.56441	6.47552	15.6959	13.6832	6.14713	16.1671	4.62487	3.02906	11.1385	10.8521	3.01697	11.2609	7.976	7.56153	23.3087
F20G1F08	F20	G	LS1	F	8	37.56	21.4075	7.94654	3.6412	4.4133	7.98054	2.95633	8.90394	7.67105	2.37535	16.3785	7.16028	2.35043	16.4386	8.17819	2.34937	16.424	5.47057	2.90692	17.8138	9.97954	2.94054	17.708	5.25181	3.00243	16.9889	10.2375	3.1379	16.8385	2.01412	6.38229	15.5075	13.204	6.03886	16.2878	4.72808	3.12352	11.2419	10.6725	3.1208	11.3249	7.96026	7.48534	22.6761
F20G1F09	F20	G	LS1	F	9	36.68	20.8945	7.98036	3.71196	4.6768	7.9801	3.04095	9.03983	7.6726	2.63299	16.4134	7.1853	2.61452	16.435	8.15281	2.59655	16.5052	5.51595	3.17806	17.8278	9.91076	3.09305	17.8209	5.26918	3.26355	17.0085	10.2124	3.25586	16.9851	2.04701	6.45688	15.6996	13.432	6.3734	16.0998	4.78225	3.16072	11.332	10.7925	3.20271	11.4453	7.95953	7.60231	22.6193
F20J1F01	F20	J	LS1	F	1	32.53	19.6284	7.95066	3.40138	4.72348	7.89451	2.79739	8.89791	7.67606	2.41737	15.9417	7.18595	2.38909	15.966	8.16454	2.3963	16.0052	5.54442	2.90674	17.1814	9.96907	3.0151	17.3005	5.31913	2.94727	16.3119	10.3104	3.1788	16.4479	2.05628	6.62249	15.1279	13.1998	6.2705	15.7281	4.49832	3.06545	11.0533	11.0277	3.03957	11.0661	7.8653	7.36583	22.1144
F20J1F02	F20	J	LS1	F	2	36.21	20.4979	7.74881	3.42604	4.32868	7.81574	2.90705	8.86916	7.45574	2.40716	16.3112	6.99313	2.37236	16.3255	7.89362	2.3703	16.3862	5.05736	2.89239	17.6817	9.68739	2.66887	17.6825	4.82418	3.09558	16.7673	10.1949	3.05671	16.6593	1.80337	6.74982	15.6893	13.326	6.34505	16.1992	4.29214	3.13948	11.1913	10.7834	3.02773	11.2203	7.8918	7.55441	22.8198
F20J1F03	F20	J	LS1	F	3	39.63	22.2583	7.98907	3.39905	4.56492	8.01637	2.86859	8.72672	7.48766	2.357	16.119	6.94433	2.32015	16.1303	7.99326	2.32546	16.2002	5.09771	2.89364	17.5376	9.96138	2.76675	17.6734	4.84901	3.07445	16.7124	10.3267	2.9802	16.8305	1.64925	6.57277	15.4716	13.533	6.30845	16.0163	4.41071	3.15816	10.9845	10.8316	3.01339	11.1428	7.8281	7.52109	22.932
F20K1F02	F20	K	LS1	F	2	41.3	21.3074	8.12606	3.61675	4.95103	8.1292	3.01551	9.35753	7.68179	2.52856	16.4374	7.18119	2.51281	16.4841	8.15832	2.49098	16.5167	5.3985	3.01393	17.7742	9.92338	2.91394	17.78	5.12688	3.14684	16.987	10.3236	3.1547	16.8845	1.7944	6.7235	15.6763	13.4989	6.44329	16.0192	4.75588	3.22094	11.2687	10.9048	3.18935	11.3358	7.98057	7.37828	22.9577
F20M1F01	F20	M	LS1	F	1	36.28	20.9873	7.96169	3.64612	4.69327	8.13796	2.97517	8.85921	7.71535	2.4089	16.14	7.32299	2.33659	16.1837	8.12316	2.3898	16.2077	5.87402	2.46565	18.0085	9.8479	2.96041	17.7606	5.55164	2.2871	16.9956	10.1425	3.15186	16.7613	2.01556	6.48377	15.3065	13.2341	6.19644	15.8124	5.064	2.91416	10.9233	10.7717	3.13874	11.1442	7.80948	7.54691	22.7576
F20M1F02	F20	M	LS1	F	2	28.46	19.2998	8.00578	3.83157	5.04637	8.1121	2.87822	9.03116	7.56578	2.65724	16.1252	7.0866	2.64383	16.1779	8.01748	2.62782	16.1953	5.47968	3.23562	17.4777	9.59581	3.21372	17.5131	5.19407	3.29703	16.6372	9.89983	3.32891	16.6835	2.35985	6.44898	15.3554	12.8338	6.13505	15.7632	4.62355	3.22819	11.308	10.7661	3.13119	11.291	7.93855	7.68431	21.7317
F20M1F04	F20	M	LS1	F	4	44.46	21.3333	8.32098	3.42179	4.42772	7.91964	2.93826	8.80612	7.48794	2.34426	16.3198	7.02229	2.31478	16.34	7.93144	2.29469	16.3971	5.24611	2.92139	17.9264	9.73483	2.71004	17.9356	5.03338	3.02996	17.0453	10.0559	2.93425	16.9555	1.87793	6.46488	15.6784	13.4444	6.1411	16.1155	4.67553	2.99511	11.0836	10.5993	2.8439	11.2734	7.80569	7.59882	23.0157
F20N1F01	F20	N	LS1	F	1	43.86	21.7026	8.00958	3.42466	4.45033	8.12606	2.67799	8.94063	7.66729	2.33051	16.4439	7.17243	2.30261	16.4739	8.13129	2.30592	16.5362	5.43202	2.86682	17.7832	9.90084	2.89854	17.839	5.16575	2.9461	16.9317	10.2971	3.06611	16.9294	2.18838	6.30425	15.4305	13.3095	6.07912	16.0813	4.76065	2.82732	11.2756	10.8938	2.87583	11.451	7.87054	7.46346	22.4445
F20N1F02	F20	N	LS1	F	2	29.39	21.9042	8.02004	3.84827	4.64963	8.14596	3.11471	8.784	7.64375	2.50582	16.1352	7.16237	2.47936	16.1729	8.11034	2.47178	16.2417	5.47514	3.03591	17.6051	9.8134	3.02407	17.5975	5.24374	3.11543	16.7578	10.1544	3.21169	16.6815	2.2887	6.31272	15.3632	13.1453	6.2104	15.9074	4.89115	3.1594	11.1994	10.808	3.16604	11.3016	7.83059	7.61608	22.4017
F20B1M05	F20	B	LS1	M	5	54.17	22.4309	8.01625	3.50696	4.90492	8.13737	2.99794	9.07625	7.66602	2.38463	16.3536	7.16569	2.33968	16.4034	8.15061	2.34438	16.4334	5.39926	2.74433	17.9638	10.0249	2.83526	17.9939	5.07795	2.86058	17.044	10.3642	3.10324	16.942	1.42493	6.55669	15.4563	13.8039	6.28053	16.0906	4.87552	3.044	11.0971	10.7595	3.09419	11.4064	7.9533	7.56347	23.2372
F20B1M06	F20	B	LS1	M	6	36.2	20.5559	7.9542	3.76131	4.86528	8.02761	3.01083	8.96127	7.60243	2.44439	16.1418	7.12658	2.4032	16.1694	8.07512	2.41737	16.2151	5.41753	2.88614	17.6291	9.84986	2.90093	17.6521	5.16765	2.96041	16.8058	10.1461	3.06158	16.7348	2.10543	6.51316	15.2837	13.1534	6.19713	15.9417	4.91661	3.15483	11.0684	10.6592	3.17123	11.2233	7.88458	7.47975	22.6352
F20B1M07	F20	B	LS1	M	7	55.8	22.6642	8.13881	3.80559	4.65934	8.26875	3.34691	8.85786	7.9397	2.40983	16.0492	7.48698	2.37738	16.1098	8.36196	2.35228	16.1233	5.61943	2.80446	17.676	10.1241	2.72631	17.7483	5.40891	2.9732	16.7349	10.4741	2.96872	16.735	2.05099	6.62889	15.22	13.8345	6.14434	15.9772	5.15214	3.52245	10.8047	10.8478	3.35359	10.9169	7.90943	7.34103	23.4845
F20B1M09	F20	B	LS1	M	9	39.9	20.3817	7.98408	3.83139	4.8624	8.04648	3.17639	8.91743	7.54348	2.6782	16.1192	7.04558	2.64979	16.1687	8.01372	2.63543	16.2055	5.32391	3.14003	17.6816	9.74124	3.08501	17.7054	5.10028	3.25186	16.7445	10.0376	3.25405	16.7454	2.03039	6.63212	15.311	13.112	6.27018	15.885	4.76014	3.3426	11.2246	10.6509	3.27724	11.3127	7.86095	7.54224	22.4494
F20D1M10	F20	D	LS1	M	10	36.88	21.4313	8.12733	3.71462	4.6557	7.99431	3.09452	8.90734	7.61369	2.30412	16.807	7.13667	2.25223	16.8254	8.07126	2.2912	16.8918	5.28351	2.84382	18.2388	9.70285	2.8048	18.2509	5.03657	2.89065	17.3359	10.1169	2.9995	17.3548	1.63796	6.64854	15.717	13.673	6.36498	16.4599	4.81493	3.08945	11.0873	10.6858	3.16572	11.3286	7.75853	7.49222	23.0852
F20D1M11	F20	D	LS1	M	11	29.41	19.2674	7.83726	3.84483	4.68509	7.97579	2.98878	9.10215	7.57017	2.55586	16.3202	7.11402	2.53109	16.3361	8.01957	2.52567	16.4098	5.50949	3.0143	17.5509	9.63206	3.02071	17.6057	5.29354	3.02296	16.7654	10.0175	3.11698	16.7552	1.96613	6.58767	15.4693	13.2069	6.28211	16.0838	4.68363	3.15533	11.3129	10.6751	3.04635	11.4241	7.92703	7.44638	22.1748
F20G1M11	F20	G	LS1	M	11	39	20.6874	7.97308	3.71949	4.64438	8.12768	3.02779	9.05282	7.60541	2.40353	16.3814	7.10279	2.37908	16.4445	8.08737	2.37732	16.4582	5.39396	2.9132	17.8255	9.88327	2.93294	17.7814	5.13912	2.97803	16.9897	10.2022	3.10677	16.8715	1.95033	6.53236	15.5756	13.3282	6.30349	15.959	4.84048	3.13156	11.3106	10.7917	3.19019	11.3882	7.80146	7.46867	22.3579
F20G1M13	F20	G	LS1	M	13	49.35	22.6473	7.75441	3.63592	4.26888	7.87108	3.00283	8.91376	7.45361	2.49953	16.4439	6.96729	2.4782	16.4964	7.91188	2.46171	16.5094	5.18734	3.02819	18.0568	9.74703	2.9485	17.9761	4.93467	3.12878	17.1347	10.0756	3.13201	17.0304	1.44667	6.69852	15.6844	13.5809	6.1813	16.2576	4.57085	3.22459	10.9904	10.552	3.19016	11.0655	7.96412	7.58882	23.2515
F20H1M07	F20	H	LS1	M	7	52.4	22.7325	8.00509	3.57662	4.45165	8.08211	2.96313	9.00231	7.52743	2.1288	16.4967	7.04635	2.0798	16.5482	7.98714	2.08976	16.5682	5.23343	2.48986	18.0641	9.89323	2.49309	18.0604	5.01831	2.62234	17.1191	10.1987	2.78618	17.0676	1.55871	6.07876	15.9052	13.547	5.75305	16.2619	4.85445	2.94868	11.0076	10.5151	3.03137	10.9803	7.94494	7.33725	23.7906
F20H1M09	F20	H	LS1	M	9	47.38	22.0392	8.11514	3.64227	4.41748	8.24225	3.07867	8.86883	7.74072	2.34939	16.4991	7.23994	2.31638	16.5147	8.2143	2.31334	16.5869	5.38701	2.89271	17.9673	10.0996	2.87831	18.1328	5.13085	3.00109	17.027	10.4618	3.11544	17.1499	1.73566	6.58889	15.5357	13.6265	6.27406	16.1269	4.91232	3.22356	10.9813	10.916	3.23682	11.1248	7.86854	7.40842	23.228
F20I1M08	F20	I	LS1	M	8	47.43	21.4623	8.02282	3.78592	4.39151	7.94713	3.31927	8.81862	7.51792	2.50708	16.3168	7.06005	2.46073	16.3503	7.96261	2.48119	16.3945	5.25857	2.88503	17.7983	9.80556	2.9611	17.8179	5.00673	3.00591	16.8499	10.1837	3.21888	16.8463	1.49703	6.64249	15.5468	13.5017	6.25073	16.1194	4.82845	3.28341	10.8729	10.4614	3.35628	10.9898	7.83316	7.58053	23.0843
F20J1M07	F20	J	LS1	M	7	48.93	21.8467	8.00412	3.67223	4.52417	8.02176	2.99048	8.93334	7.50634	2.16409	16.5995	7.0151	2.13876	16.6315	7.98171	2.13525	16.6752	5.05198	2.69509	18.0442	9.97247	2.65029	18.0084	4.76401	2.80482	17.1449	10.3258	2.85232	17.0968	1.35919	6.50692	15.6481	13.6559	6.2295	16.1749	4.66524	3.1122	11.11	10.7309	3.08839	11.0945	7.92651	7.41269	23.2481
F20J1M09	F20	J	LS1	M	9	50.06	21.5455	7.93901	3.71532	4.41215	8.03817	3.07592	8.70649	7.50326	2.11412	16.1501	7.01461	2.08435	16.1986	7.97511	2.07435	16.2354	5.07597	2.63333	17.8882	9.98794	2.61586	17.8991	4.82698	2.76111	16.908	10.3678	2.90715	16.8762	1.42078	6.55541	15.6788	13.5611	6.11977	16.2264	4.67947	3.18881	10.8987	10.7302	3.12568	11.0498	7.95819	7.43526	23.3677
F20J1M10	F20	J	LS1	M	10	41.91	20.5923	8.04346	3.65648	4.61104	8.07938	2.95273	8.97275	7.51847	2.23467	16.2212	6.9955	2.20427	16.2599	8.031	2.20011	16.2986	5.22581	2.71082	17.6399	10.0047	2.71377	17.5154	4.9527	2.8215	16.7047	10.3602	2.89485	16.5492	1.87187	6.59942	15.6838	13.2856	6.24227	16.0829	4.68536	3.10294	11.227	10.7768	3.10454	11.1302	7.99103	7.33454	22.9291
F20L1M07	F20	L	LS1	M	7	40.36	21.6262	7.95748	3.90596	4.77595	7.9414	3.14628	8.90208	7.52844	2.34295	16.3365	7.05131	2.30328	16.3867	7.99469	2.30347	16.4175	5.30593	2.7635	17.8676	9.76294	2.72866	17.842	5.09847	2.89161	16.9972	10.0778	2.91987	16.9477	1.66926	6.53796	15.3447	13.3888	6.163	15.8119	4.82652	3.1244	11.1997	10.5485	3.15607	11.2126	7.95728	7.53965	22.8654
F20M1M05	F20	M	LS1	M	5	53.06	21.6299	8.48085	3.82376	4.45835	8.34449	3.09948	8.65099	7.49549	2.4983	15.823	7.06419	2.43923	15.8598	7.92829	2.47015	15.9163	5.71508	2.71273	17.3933	9.56246	2.71634	17.5271	5.48248	2.7154	16.575	9.91658	2.84407	16.6385	1.94161	6.26653	15.6729	13.4795	5.90146	16.4473	4.95479	3.03509	10.4527	10.7989	3.1748	10.8045	7.73	7.52529	22.8162
F20N1M03	F20	N	LS1	M	3	46.12	22.3732	7.78804	3.70613	4.47767	7.98645	2.95444	9.03395	7.54906	2.27504	16.3575	7.08871	2.24114	16.3776	7.98373	2.22966	16.4498	5.32757	2.627	17.932	9.85343	2.63002	17.9141	5.05852	2.73342	16.981	10.2401	2.82836	16.9109	1.58986	6.44733	15.8472	13.6689	6.05766	16.1838	4.72404	3.10477	11.0393	10.7004	3.06053	10.9904	8.06328	7.48593	23.3586
F20N1M04	F20	N	LS1	M	4	46.36	22.0071	7.91882	3.69546	4.51181	8.03329	3.23074	9.02383	7.60345	2.53338	16.3083	7.11499	2.48655	16.3528	8.07356	2.4957	16.3779	5.18902	2.97928	17.9482	10.0231	3.02628	17.9117	4.93563	3.07152	17.0181	10.425	3.26828	16.9099	1.68039	6.6794	15.6197	13.6965	6.50392	16.1261	4.81679	3.26646	11.123	10.7435	3.28894	11.2299	7.78996	7.5778	23.296
F20P1M05	F20	P	LS1	M	5	47.17	21.6098	8.0076	3.47784	4.51121	8.01163	2.82862	8.88287	7.60683	2.38142	16.432	7.13569	2.34608	16.4606	8.05318	2.35002	16.5115	5.28674	2.88567	17.9629	9.90914	2.86982	18.0782	5.0698	2.91861	17.0819	10.2484	3.048	17.112	1.61399	6.32341	15.6468	13.6986	6.04749	16.1662	4.716	3.00651	11.0571	10.8161	2.98222	11.2213	7.91572	7.42099	23.1157
F20A2F02	F20	A	LS2	F	2	35.49	21.1825	8.01976	3.80541	4.43376	8.13191	2.94896	8.62014	7.71181	2.50181	16.1454	7.24018	2.47168	16.1895	8.16086	2.47406	16.2159	5.5223	3.06996	17.6632	9.92364	3.0427	17.6696	5.26211	3.16966	16.8438	10.2244	3.19873	16.8052	1.94786	6.34615	15.5432	13.3491	5.95616	15.837	4.73629	3.08046	10.9233	10.9273	3.02759	10.9252	8.0271	7.77456	22.5717
F20A2F03	F20	A	LS2	F	3	41.39	21.1487	8.00285	3.67135	4.69668	8.1185	2.92257	8.96175	7.62084	2.4603	16.3164	7.11975	2.42038	16.3549	8.11842	2.43447	16.4132	5.4174	3.01462	17.8206	9.74071	3.01918	17.9033	5.18199	3.04294	17.0366	10.1741	3.25753	16.9848	1.96827	6.34732	15.713	13.2579	6.09613	16.3035	4.8613	2.95367	11.2101	10.7999	3.08312	11.1928	7.839	7.6187	22.686
F20B2F02	F20	B	LS2	F	2	51.57	23.4462	7.92789	3.56938	4.04803	8.11016	3.07945	8.57736	7.57862	2.51517	16.2145	7.00718	2.48593	16.2626	8.12594	2.46531	16.2998	5.13896	3.10951	17.9524	10.0054	3.08908	17.9573	4.93455	3.24312	17.0432	10.2877	3.3145	16.9599	1.5218	6.83667	15.6383	13.7382	6.45631	16.2901	4.64238	3.20303	10.9064	10.8661	3.11822	11.0015	7.91681	7.70571	23.1869
F20C2F03	F20	C	LS2	F	3	34.13	21.1377	7.88689	3.69305	4.54807	8.05918	3.08212	8.81755	7.55441	2.60671	16.3642	7.07613	2.58695	16.4005	8.01673	2.56525	16.4673	5.33389	3.14602	17.8698	9.74286	3.04869	17.9423	5.15053	3.24919	16.9765	10.0863	3.18533	17.0706	1.97363	6.70355	15.4786	13.2888	6.28764	16.0237	4.69905	3.36428	11.0355	10.7613	3.21759	11.0984	7.89888	7.67488	22.7556
F20C2F05	F20	C	LS2	F	5	36.94	21.5948	8.01368	3.72641	4.62985	8.12192	2.92454	8.90686	7.50942	2.62565	16.267	7.01569	2.60803	16.3048	7.9835	2.58423	16.3528	5.35448	3.22915	17.7501	9.68867	3.17865	17.7797	5.09172	3.32106	16.9553	10.0236	3.3424	16.9246	2.00546	6.62022	15.5701	13.1777	6.14677	16.423	4.71839	3.2607	11.1053	10.5575	3.22029	11.2522	7.95102	7.70924	22.5877
F20D2F02	F20	D	LS2	F	2	47.98	21.5975	8.06636	3.65345	4.61412	8.08104	3.09378	9.01968	7.5729	2.63166	16.2989	7.06889	2.59913	16.3611	8.06424	2.60169	16.3504	5.3124	3.1144	17.7773	9.8603	3.13935	17.7853	5.10456	3.21676	16.9208	10.1849	3.2905	16.8706	1.8232	6.47451	15.4662	13.4966	6.30981	16.1854	4.66543	3.23368	11.131	10.904	3.36309	11.1189	7.73766	7.55576	22.9423
F20E2F01	F20	E	LS2	F	1	42.51	23.0414	7.90668	3.659	4.14118	7.97186	2.96762	8.81339	7.50778	2.51789	16.4562	7.00179	2.48336	16.5138	8.00026	2.48353	16.5397	5.18919	3.04176	18.1647	9.91606	2.99098	18.1837	4.90737	3.16683	17.2527	10.2298	3.1508	17.2515	1.57717	6.97003	15.7719	13.6178	6.50824	16.2994	4.49394	3.2166	11.208	10.8091	3.12552	11.2209	7.90585	7.80241	23.349
F20G2F01	F20	G	LS2	F	1	44.4	22.6513	7.81077	3.53563	4.10771	7.68394	2.88546	9.03578	7.42179	2.35458	16.3253	6.95718	2.32412	16.3806	7.85444	2.29576	16.3951	5.16143	2.99102	18.0229	9.58955	2.60936	17.9593	4.93124	3.04439	17.1604	9.98174	2.92391	17.0508	1.61062	6.69733	15.9258	13.4928	6.3856	16.1864	4.53411	2.96318	11.0671	10.5154	2.9057	11.0807	7.8422	7.68565	23.2446
F20G2F04	F20	G	LS2	F	4	32.25	20.3858	8.16215	3.65524	4.63031	8.20263	2.83649	8.76353	7.67761	2.50953	16.1957	7.16233	2.48063	16.2205	8.17648	2.48861	16.2968	5.39804	3.1541	17.5514	9.89864	3.12866	17.5943	5.24941	3.18637	16.6988	10.1827	3.26073	16.6791	2.28643	6.30177	15.5916	13.0689	6.10834	16.2229	4.8197	3.03063	11.1547	10.8363	2.9915	11.2805	7.93578	7.57155	22.1335
F20G2F05	F20	G	LS2	F	5	33.09	19.8374	7.69066	3.42631	4.83208	7.90718	2.65228	8.95546	7.5155	2.4794	16.1909	6.98328	2.46547	16.2201	8.01526	2.43963	16.279	5.20139	3.16727	17.4843	9.78492	3.0419	17.5953	4.98818	3.19398	16.6724	10.0545	3.14791	16.653	2.09972	6.48602	15.5412	12.975	5.98537	16.1395	4.40547	2.99012	11.2252	10.7751	2.87606	11.3328	7.98804	7.48829	22.1865
F20H2F04	F20	H	LS2	F	4	45.92	21.0811	7.83516	3.76041	4.35191	7.96225	3.1268	8.73074	7.52914	2.64437	16.2359	7.04956	2.61483	16.2708	8.00088	2.59519	16.3226	5.42288	3.16833	17.7555	9.79452	3.08587	17.83	5.17936	3.20184	16.8099	10.1579	3.22353	16.8713	1.80629	6.80128	15.5734	13.4163	6.45045	15.9745	4.62808	3.35795	10.8801	10.6774	3.11919	11.0317	7.98086	7.78671	22.7453
F20H2F06	F20	H	LS2	F	6	46.75	21.6188	8.04808	3.64907	4.38249	8.06676	2.95481	8.88722	7.589	2.58432	16.1285	7.07737	2.561	16.2026	8.08613	2.54854	16.2243	5.45548	3.12273	17.7683	9.75285	3.14957	17.8209	5.20896	3.18719	16.8763	10.0926	3.29908	16.9022	1.89698	6.53273	15.8473	13.2917	6.32389	16.3579	4.75346	3.15048	10.9306	10.7736	3.14276	11.1317	7.85045	7.79356	22.7912
F20I2F01	F20	I	LS2	F	1	39.78	21.5767	7.94336	3.51527	4.4492	7.85578	2.88948	8.9075	7.50688	2.5521	16.4195	6.99021	2.53845	16.434	7.95746	2.51016	16.506	5.21302	3.19424	17.7976	9.73653	3.13451	18.005	5.00003	3.22884	16.9812	10.091	3.23509	17.0789	1.65678	6.56788	15.837	13.3552	6.29395	16.4307	4.57447	3.12363	11.0611	10.6593	3.03999	11.3084	7.78825	7.82716	22.8471
F20I2F03	F20	I	LS2	F	3	39.11	21.839	7.87648	3.75176	4.21451	7.89674	3.2063	8.62025	7.67464	2.58441	16.129	7.20418	2.53386	16.1729	8.15076	2.56003	16.1878	5.60438	3.05238	17.6975	9.91649	3.18659	17.6467	5.26483	3.28709	16.7433	10.2778	3.43995	16.719	1.96778	6.78832	15.6201	13.3657	6.38299	16.2436	4.58849	3.33288	10.992	10.7644	3.22718	11.0548	8.05724	7.74907	22.6202
F20J2F01	F20	J	LS2	F	1	34.7	20.6259	8.00823	3.75329	4.65688	8.04978	2.96123	9.28421	7.56837	2.61712	16.2188	7.04296	2.58597	16.2608	8.08378	2.59332	16.3229	5.29143	3.22623	17.6689	9.87671	3.2619	17.7224	5.14516	3.2576	16.8479	10.1401	3.38805	16.8555	2.08605	6.57175	15.5572	13.2035	6.32083	16.3223	4.63592	3.17154	11.2675	10.8087	3.09245	11.471	7.89299	7.69733	22.4931
F20J2F03	F20	J	LS2	F	3	30.4	19.8037	7.9427	3.69748	5.09526	8.08847	2.9096	9.23352	7.66805	2.79567	16.1127	7.15317	2.78792	16.1656	8.16487	2.75921	16.2157	5.466	3.4212	17.5191	9.85891	3.36645	17.5256	5.25338	3.4654	16.7473	10.133	3.46565	16.6322	2.32437	6.63285	15.3385	13.0345	6.29089	15.8355	4.78594	3.21713	11.2953	10.7845	3.1637	11.4924	7.9726	7.66765	22.005
F20J2F06	F20	J	LS2	F	6	29.39	20.1208	8.03298	3.63462	4.7251	8.09878	2.98243	9.02983	7.62212	2.70681	15.9936	7.12426	2.69442	16.0424	8.09124	2.66631	16.0674	5.33041	3.29049	17.4354	9.76209	3.28061	17.4492	5.16709	3.41704	16.5505	10.0475	3.43081	16.5125	2.26504	6.63896	15.3679	12.9352	6.38792	15.9496	4.70885	3.20456	11.2107	10.8278	3.215	11.2836	7.88874	7.61047	22.1394
F20J2F07	F20	J	LS2	F	7	32.37	19.9344	7.42881	3.43173	5.32254	7.9224	2.95293	9.76738	7.46112	2.97454	15.9747	6.83137	2.99196	16.0553	8.12603	2.93311	16.0735	5.20294	3.73587	17.363	10.1155	3.61031	17.4177	4.99354	3.85651	16.6546	10.4527	3.78117	16.6786	1.98895	7.24374	15.6119	13.3864	6.9788	15.8949	4.32075	3.51778	11.5228	11.0527	3.38102	11.7089	7.95214	7.73331	21.8204
F20K2F02	F20	K	LS2	F	2	36.45	22.0516	7.80404	3.73057	4.21478	7.89743	3.09792	8.88789	7.48969	2.48753	16.1452	7.00802	2.46994	16.2363	7.96272	2.44535	16.2174	5.41173	3.08024	17.9269	9.71007	2.98217	17.8153	5.16595	3.21103	17.0646	10.0169	3.18102	16.8904	1.93363	6.74825	15.6775	13.3379	6.30065	15.9535	4.664	3.23643	11.0868	10.5926	3.12833	11.0841	8.08013	7.63242	23.0219
F20K2F04	F20	K	LS2	F	4	46.86	22.2018	8.05753	3.65794	4.14664	8.08226	2.99764	8.61548	7.59534	2.43435	16.1406	7.10879	2.40068	16.1906	8.06663	2.40231	16.2171	5.39029	2.96302	17.6138	9.79075	3.00725	17.7216	5.19681	2.97597	16.7689	10.0889	3.17384	16.8111	1.84149	6.3344	15.4333	13.3982	6.29744	15.9216	4.76139	3.12069	10.8328	10.8194	3.11194	10.957	7.8902	7.70446	22.8612
F20L2F03	F20	L	LS2	F	3	36.5	22.2394	8.10484	3.8095	4.40569	8.10531	3.26005	8.66729	7.61615	2.66358	15.9264	7.13877	2.63134	15.9621	8.09879	2.61274	15.9858	5.36409	3.17575	17.5907	10.0111	3.12701	17.6455	5.11512	3.30423	16.6878	10.362	3.33447	16.705	1.8684	6.83933	15.5775	13.6435	6.42912	16.0437	4.74678	3.27171	11.0237	10.9972	3.24577	11.1511	7.93579	7.70451	22.8651
F20L2F04	F20	L	LS2	F	4	35.74	20.6025	7.93625	3.78558	4.54326	8.14543	2.91617	8.96363	7.62401	2.4322	16.0792	7.1247	2.41954	16.1385	8.103	2.39286	16.1488	5.33851	3.11531	17.6346	9.89153	3.00007	17.6165	5.13438	3.16121	16.7992	10.1895	3.12167	16.6835	2.08422	6.64726	15.5534	13.2844	6.19233	16.3062	4.7675	3.06264	11.3599	10.8303	3.00446	11.3824	8.0067	7.64148	22.198
F20L2F05	F20	L	LS2	F	5	24.01	18.6576	7.98681	3.98645	5.05509	8.11713	3.31984	8.81698	7.65268	2.98433	15.6375	7.19298	2.95601	15.6692	8.10105	2.96817	15.7124	5.50063	3.51952	16.9703	9.87331	3.59	16.9784	5.3015	3.56486	16.1913	10.1472	3.80615	16.1501	2.51809	6.70592	15.001	12.8729	6.69001	15.6077	4.88924	3.38145	11.1803	10.8243	3.49553	11.3554	7.9396	7.66366	21.2761
F20M2F01	F20	M	LS2	F	1	47.36	21.8181	7.91663	3.85784	4.35744	7.96747	3.14939	8.94897	7.64398	2.73984	16.2695	7.1546	2.71554	16.2807	8.12476	2.69454	16.3642	5.47054	3.32626	17.7415	9.8505	3.21889	17.8383	5.23929	3.39677	16.9337	10.156	3.36591	16.9498	1.73197	6.7989	15.6404	13.5297	6.44774	16.3244	4.73781	3.34879	10.9972	10.8034	3.31138	11.1271	7.88924	7.72541	22.8855
F20M2F02	F20	M	LS2	F	2	30.72	19.4431	8.10974	3.45676	4.81945	8.06112	2.84393	9.09025	7.58884	2.69035	15.9972	7.15693	2.64911	16.0511	8.0001	2.65777	16.052	5.37064	3.24018	17.374	9.75166	3.10273	17.3122	5.24075	3.27755	16.4901	10.0541	3.26021	16.4167	1.96723	6.67788	15.0648	13.2716	6.31448	15.7765	4.70968	3.17077	11.1361	10.7363	3.12282	11.2829	7.93111	7.71901	21.8106
F20M2F03	F20	M	LS2	F	3	34.05	20.3477	7.78352	3.59119	4.4545	7.96687	2.92366	8.79414	7.60115	2.62409	16.006	7.12485	2.59591	16.045	8.0424	2.58816	16.0952	5.34983	3.19189	17.5847	9.81381	3.05295	17.5798	5.11621	3.19014	16.8481	10.1332	3.25903	16.6621	2.10621	6.58635	15.6741	13.1821	6.30581	16.1136	4.49565	3.21295	10.9925	10.8214	3.10777	11.2634	7.93745	7.61309	22.324
F20M2F04	F20	M	LS2	F	4	32.48	20.5299	7.80917	3.7833	4.41688	8.08822	3.11951	8.84538	7.67363	2.78436	15.8888	7.18166	2.74135	15.9257	8.17239	2.73643	15.9675	5.57967	3.1097	17.1684	9.77926	3.17784	17.3627	5.39987	3.26542	16.3394	10.0553	3.34173	16.4797	2.27375	6.69864	15.4488	13.2121	6.36409	16.1168	4.75003	3.34122	11.0418	10.9126	3.32358	11.1312	7.99362	7.65235	22.0895
F20M2F05	F20	M	LS2	F	5	32.7	21.1788	7.84679	3.6495	4.61126	7.96733	3.08324	8.96756	7.59314	2.78568	16.0639	7.11979	2.74506	16.089	8.0282	2.75888	16.1384	5.38515	3.25852	17.5621	9.69189	3.22587	17.5606	5.16271	3.35064	16.7251	9.98098	3.42021	16.6939	1.95149	6.79042	15.4549	13.1601	6.52213	16.0237	4.7665	3.30549	11.0468	10.5531	3.33584	11.0721	7.92188	7.66384	22.4958
F20M2F07	F20	M	LS2	F	7	29.44	19.7066	8.12183	3.45006	4.85987	8.13484	2.6937	8.86175	7.76047	2.53919	15.91	7.24493	2.4854	15.9415	8.26132	2.5224	15.9802	5.47425	3.067	17.2053	9.89869	3.08804	17.2044	5.25475	3.1087	16.4559	10.2305	3.1889	16.4349	2.10322	6.47972	15.2285	13.2688	6.14351	15.9767	4.60174	2.91284	11.1964	10.9911	2.96539	11.2922	7.87924	7.67832	21.7903
F20N2F02	F20	N	LS2	F	2	53.24	21.3993	7.94091	3.64828	4.63374	8.00949	3.05857	8.90223	7.51064	2.56759	16.2017	7.05467	2.53721	16.2669	7.94604	2.52993	16.292	5.32343	3.06371	17.8209	9.67992	2.97638	17.9311	5.05344	3.08645	16.9855	9.99998	3.06571	16.9819	1.43519	6.58287	15.6701	13.6076	6.20842	16.2208	4.62746	3.15875	11.047	10.7642	3.0582	11.1655	7.91754	7.70014	22.96
F20P2F03	F20	P	LS2	F	3	47.88	22.4514	7.9431	3.62435	4.29736	8.0302	3.07035	8.76866	7.61883	2.63032	16.109	7.1451	2.62006	16.2019	8.06846	2.56993	16.1728	5.32478	3.17303	17.8703	9.90447	3.0153	17.8428	5.07149	3.30363	17.0001	10.2903	3.24446	16.8528	1.90277	6.73743	15.7343	13.5016	6.26957	16.4326	4.68597	3.31404	10.9353	10.835	3.1445	10.9947	8.03515	7.89136	23.1625
F20P2F06	F20	P	LS2	F	6	40.32	20.9665	8.0238	3.77129	4.652	8.09208	3.08587	8.92247	7.64852	2.68964	16.2445	7.17461	2.65357	16.2854	8.1044	2.64589	16.3195	5.52738	3.16278	17.6033	9.77779	3.10761	17.718	5.3318	3.21191	16.753	10.1783	3.29541	16.8079	2.09964	6.34595	15.6174	13.3488	6.20023	16.1895	4.7589	3.3142	11.1555	10.8182	3.17893	11.2102	7.87813	7.7083	22.9197
F20D2M05	F20	D	LS2	M	5	51.74	22.1426	7.8591	3.6394	4.49804	8.04953	2.99166	8.88768	7.69439	2.44257	16.3165	7.18029	2.40058	16.3486	8.16626	2.41325	16.3921	5.39653	2.92189	18.0265	9.90216	2.94917	18.0093	5.26091	2.956	17.0818	10.2196	3.08106	17.048	1.83554	6.74197	16.014	13.657	6.34641	16.529	4.63814	3.18328	11.2883	10.9578	3.16837	11.2778	7.90828	7.594	23.0199
F20E2M07	F20	E	LS2	M	7	47.49	22.2201	8.01637	3.75338	4.49845	7.94417	3.2075	8.89846	7.48996	2.48415	16.2486	6.98194	2.44316	16.3049	7.98432	2.45042	16.3338	5.17066	3.05059	17.8909	9.82258	3.01454	17.8255	4.93855	3.08628	16.9556	10.1443	3.16913	16.8891	1.46407	6.79055	15.7416	13.5646	6.40901	16.1491	4.52698	3.37962	11.0686	10.833	3.35151	11.1519	7.88594	7.742	22.7724
F20G2M07	F20	G	LS2	M	7	42.01	21.1814	7.82093	3.63683	4.70275	8.01928	2.97612	8.92931	7.57699	2.57212	16.0368	7.03723	2.54367	16.1236	8.09072	2.54356	16.122	5.24686	3.17701	17.6381	9.85541	3.19228	17.5712	4.99835	3.21536	16.7847	10.1698	3.33741	16.6522	1.8052	6.6531	15.5459	13.3711	6.28088	16.0805	4.6065	3.14426	11.1821	10.6276	3.08355	11.1858	7.93193	7.6221	22.2978
F20I2M07	F20	I	LS2	M	7	44.87	21.1567	8.01737	3.71294	4.57852	8.12992	3.07712	8.74355	7.5947	2.55149	16.0687	7.07216	2.54324	16.104	8.10187	2.49523	16.1683	5.37032	3.13316	17.5557	9.69421	3.0383	17.5853	5.14211	3.19466	16.7091	10.1346	3.28171	16.6139	1.88923	6.37474	15.9014	13.3845	6.00066	16.248	4.6548	3.26659	10.8368	10.9599	3.26239	11.0086	7.96451	7.7141	22.5143
F20L2M06	F20	L	LS2	M	6	50.9	21.9048	8.06715	3.76414	4.39481	8.08747	3.3834	9.00969	7.59889	2.43528	16.4328	7.13198	2.39092	16.4973	8.05121	2.39979	16.5147	5.22751	2.99148	18.017	9.93998	2.92312	18.0884	4.9447	3.09032	17.0274	10.3243	3.12482	17.0018	1.39739	6.9517	15.7473	13.7371	6.56705	16.5279	4.70769	3.35424	11.0779	10.8282	3.36711	11.1362	7.96698	7.73697	23.1323
F20L2M07	F20	L	LS2	M	7	50.46	22.0761	8.11661	3.83406	4.41955	8.24844	3.49881	8.933	7.7375	2.66967	16.1554	7.23955	2.60515	16.2527	8.20992	2.62877	16.2593	5.32957	3.02451	17.9779	10.0989	3.10542	17.9882	5.058	3.16487	16.9948	10.4352	3.29305	16.9043	1.58301	6.88778	15.7224	13.8199	6.57817	16.5282	4.75152	3.46678	11.1281	10.9418	3.4778	11.2856	7.93979	7.70686	23.3414
F20M2M10	F20	M	LS2	M	10	37.59	20.2445	7.97057	3.57281	4.9906	8.00399	2.9009	8.9905	7.61853	2.58308	15.8222	7.10757	2.56635	15.9197	8.12327	2.53478	15.9188	5.48993	3.1307	17.3859	9.81365	2.99821	17.3473	5.3338	3.1398	16.5842	10.0864	3.11783	16.4912	2.07472	6.41086	15.554	13.3103	5.97821	16.1074	4.80903	3.17389	11.1433	10.6252	2.97655	11.2576	8.0569	7.555	22.0347
F20M2M11	F20	M	LS2	M	11	41.35	20.7199	7.90455	3.73543	4.55017	8.09493	2.94816	9.00451	7.58797	2.48905	15.9607	7.02489	2.46852	16.0348	8.14492	2.44715	16.0336	5.37327	3.04789	17.5024	9.95683	3.02894	17.421	5.16521	3.09417	16.7153	10.2162	3.16402	16.5924	2.15431	6.3676	15.968	13.1634	6.12121	16.3319	4.68775	3.2114	11.153	10.7821	3.06744	11.2565	7.95402	7.60574	22.253
[truncated: 162 more columns]
