# Supplementary material for: Selection for increased tibia length in mice alters skull shape through parallel changes in developmental mechanisms
Source: eLife. 2021 Apr 26;10:e67612. doi: 10.7554/eLife.67612 (PMC8118654; doi:10.7554/eLife.67612)
Supplement: Figure 4—source data 1. [file elife-67612-fig4-data1.xlsx]

## Sheet: Neonate Data
ID	Line	Age	Litter Size	Tibia	1.X	1.Y	1.Z	2.X	2.Y	2.Z	3.X	3.Y	3.Z	4.X	4.Y	4.Z	5.X	5.Y	5.Z	6.X	6.Y	6.Z	7.X	7.Y	7.Z	8.X	8.Y	8.Z	9.X	9.Y	9.Z	10.X	10.Y	10.Z	11.X	11.Y	11.Z	12.X	12.Y	12.Z	13.X	13.Y	13.Z	14.X	14.Y	14.Z	15.X	15.Y	15.Z
C_P7_1A	CTL	P7	4	7.04899	5.45021	5.90775	0.108751	5.45632	6.2741	0.131296	3.24533	6.01512	3.5846	4.22769	3.13491	4.44517	4.20576	8.87118	4.5236	6.03987	1.71827	5.84098	5.98676	10.2076	5.91143	6.25686	0.999976	8.77882	6.0997	10.8523	9.00465	2.16751	2.76785	7.28033	2.23285	9.20447	7.37865	0.469417	5.66467	9.49571	0.485221	6.18772	9.45831	5.39269	0.922159	13.4332	5.45639	10.6897	13.4701
C_P7_1B	CTL	P7	4	7.28909	5.38499	6.05605	0.0995391	5.39439	6.4292	0.109098	3.26249	6.02295	3.58299	4.21945	3.14349	4.43547	4.08386	8.90583	4.6351	6.06766	1.68859	5.838	5.96626	10.3029	6.10928	6.29731	0.887611	8.80003	6.11767	10.884	9.01979	2.08616	2.6237	7.28923	2.22118	9.20379	7.50591	0.437456	5.50984	9.50054	0.460641	6.08569	9.49774	5.51822	0.798917	13.3833	5.50543	10.6571	13.579
C_P7_1C	CTL	P7	4	7.53954	5.33883	5.95008	0.0132918	5.34602	6.30428	0.0237111	3.14134	5.98834	3.4544	4.17913	3.05987	4.30398	4.07974	8.81529	4.43669	6.03346	1.69141	5.57105	5.89364	10.2511	5.84006	6.26972	0.810808	8.79544	5.98691	10.8753	9.11274	2.05671	2.54503	7.18305	2.10535	9.27504	7.41616	0.354944	5.37555	9.48007	0.326094	6.07862	9.49628	5.52407	0.698523	13.556	5.35964	10.7412	13.7668
C_P7_1D	CTL	P7	4	6.22275	5.49346	5.93716	0.770759	5.51038	6.18197	0.777527	3.37946	6.03669	4.04297	4.38375	3.16259	4.85262	4.37691	8.74858	4.77351	6.05234	2.13578	6.206	6.02152	9.80432	6.22714	6.15517	1.35931	8.90804	6.03606	10.4567	9.01715	2.52268	2.97667	7.39278	2.35254	9.03781	7.4601	0.64558	5.76239	9.28163	0.621609	6.28192	9.34804	5.55186	1.34431	12.9496	5.46539	10.6388	12.9595
C_P7_2A	CTL	P7	11	6.62814	5.47392	5.88543	0.300892	5.48012	6.25757	0.317965	3.46136	6.03305	3.68465	4.42301	3.21086	4.41018	4.4402	8.77522	4.51483	6.15102	1.94682	5.90738	6.14837	10.0059	6.10284	6.16647	1.22386	8.8525	6.07187	10.5934	9.00529	2.30557	2.84252	7.17943	2.37944	9.00094	7.3383	0.532083	5.5403	9.35653	0.521489	6.09006	9.35318	5.34268	1.09428	13.1677	5.301	10.6219	13.255
C_P7_2B	CTL	P7	11	6.24476	5.51015	5.85249	0.473778	5.51161	6.17642	0.494106	3.43026	5.94548	3.84573	4.50561	3.12073	4.58275	4.3682	8.70824	4.63915	6.12559	1.95274	5.88712	6.06792	9.90354	5.99668	6.14075	1.16413	8.90276	6.06232	10.6104	9.05849	2.30535	2.62163	7.2914	2.20694	9.20942	7.45576	0.374779	5.45799	9.16957	0.376966	6.17268	9.23673	5.33791	0.997633	13.1279	5.3243	10.6829	13.2249
C_P7_2C	CTL	P7	11	6.14509	5.56606	5.90197	0.546144	5.56171	6.23278	0.560761	3.47291	6.01411	3.7522	4.47888	3.19183	4.62008	4.39213	8.756	4.66082	6.11982	2.02469	6.04062	6.05643	9.93118	6.07887	6.12112	1.30139	8.92676	6.0304	10.5945	9.10748	2.25687	2.74441	7.28061	2.2489	9.19039	7.48547	0.34196	5.48079	8.95326	0.366799	6.20275	9.06905	5.28688	1.12889	13.1134	5.2385	10.6437	13.2115
C_P7_2D	CTL	P7	11	6.36476	5.56037	5.86629	0.280834	5.56272	6.19968	0.298496	3.34622	6.02553	3.67056	4.40917	3.21839	4.46839	4.39211	8.7563	4.51221	6.10045	1.97922	5.85766	6.14657	9.95764	5.90549	6.11033	1.21489	8.85042	6.06208	10.5903	9.04574	2.24677	2.85169	7.27604	2.26096	9.09173	7.4053	0.440871	5.56486	9.2273	0.451902	6.11684	9.29892	5.27844	1.18697	13.0753	5.28796	10.6308	13.2346
C_P7_2E	CTL	P7	11	6.44475	5.55902	5.86496	0.263224	5.5582	6.21249	0.276545	3.44634	5.95476	3.60967	4.54213	3.10321	4.44504	4.47567	8.7272	4.49	6.09458	1.91407	5.8263	6.13423	9.9541	5.93251	6.1124	1.13027	8.9486	6.10458	10.6058	9.04455	2.37912	2.86441	7.20265	2.44132	9.08326	7.35823	0.660632	5.61468	9.23014	0.622248	6.16764	9.3323	5.31525	1.09314	13.0644	5.38033	10.6156	13.1979
C_P7_2F	CTL	P7	11	6.10489	5.5329	5.91185	0.325327	5.53061	6.29275	0.333632	3.37171	5.98251	3.78518	4.53521	3.25375	4.51716	4.343	8.71114	4.64145	6.25809	2.07577	5.96268	6.02529	9.87546	6.05071	6.33853	1.32824	8.86307	5.99897	10.6106	9.10436	2.34507	2.76707	7.17853	2.21537	8.98078	7.40278	0.534547	5.39423	9.06638	0.532856	6.08868	9.17831	5.42331	1.04025	12.969	5.18505	10.5698	13.2315
C_P7_3A	CTL	P7	8	7.05966	5.4514	5.89155	0.0376976	5.4633	6.22428	0.044203	3.35257	6.0287	3.48251	4.33373	3.13824	4.37944	4.25241	8.819	4.43556	6.0772	1.77847	5.79977	6.09672	10.1701	5.80518	6.28833	1.04064	8.81836	6.24326	10.795	8.98884	2.2517	2.72165	7.22275	2.23661	9.1919	7.44328	0.520971	5.55619	9.58729	0.549046	6.13396	9.62398	5.52985	1.06702	13.38	5.56761	10.797	13.4272
C_P7_3B	CTL	P7	8	7.33172	5.37635	5.98025	0.0419935	5.37943	6.33241	0.0536216	3.21183	5.98421	3.62135	4.20648	3.16346	4.41483	4.11908	8.80353	4.55641	6.05146	1.8117	5.72029	5.98652	10.1546	5.9165	6.28191	0.979528	8.81212	6.06968	10.7604	9.05476	2.19302	2.69337	7.26396	2.14869	9.11013	7.42347	0.52101	5.48502	9.45095	0.48055	6.07401	9.53814	5.56868	0.933955	13.5028	5.41448	10.6058	13.5176
C_P7_3C	CTL	P7	8	7.37971	5.43335	5.94089	0.0243013	5.43319	6.27437	0.0310085	3.32739	5.97075	3.58033	4.3276	3.11825	4.37387	4.1774	8.84197	4.45541	6.10113	1.64147	5.95531	6.07243	10.2931	6.02364	6.31153	0.940415	8.84136	6.16322	10.8028	8.97395	2.25074	2.69668	7.24201	2.1535	9.12033	7.44108	0.428092	5.50593	9.62096	0.434323	6.06761	9.63508	5.59569	0.931149	13.498	5.4504	10.776	13.5482
C_P7_3D	CTL	P7	8	7.20902	5.32389	5.95972	0.0440507	5.34009	6.30287	0.0441951	3.16865	6.02173	3.5638	4.2293	3.14763	4.44627	4.19022	8.84617	4.53616	6.03388	1.79928	5.79431	5.97481	10.1495	5.79355	6.30265	1.07652	8.84952	6.15853	10.8217	9.02747	2.18356	2.75148	7.34265	2.29732	9.17559	7.4427	0.497923	5.62609	9.42048	0.515318	6.171	9.50588	5.46882	1.06845	13.4346	5.485	10.7594	13.4761
C_P7_3E	CTL	P7	8	6.98244	5.56275	5.91971	0.159644	5.56808	6.25751	0.179484	3.24692	6.0512	3.64712	4.33243	3.23739	4.39334	4.29481	8.82232	4.51587	6.05326	1.85599	5.78332	6.14821	10.1002	5.98467	6.23058	1.12783	8.81849	6.08937	10.6968	9.02873	2.27505	2.83743	7.28343	2.35096	9.17623	7.43512	0.47606	5.65792	9.48373	0.509752	6.15374	9.52262	5.41563	1.1501	13.2815	5.41366	10.6008	13.3781
C_P7_3F	CTL	P7	8	7.23608	5.47555	5.98099	0.0261458	5.46942	6.31544	0.0381856	3.24421	5.95654	3.46021	4.29736	3.0324	4.31557	4.11368	8.80403	4.48232	6.10951	1.65756	5.89537	6.01236	10.135	5.8792	6.30391	0.991738	8.80891	6.09842	10.7411	8.97731	2.21489	2.57149	7.16473	2.10205	9.19274	7.50846	0.416976	5.4354	9.36568	0.398186	6.10684	9.50035	5.53677	1.02266	13.4152	5.43719	10.6387	13.5537
C_P7_4A	CTL	P7	6	6.95394	5.32877	5.94442	0.0379224	5.34386	6.31781	0.0502933	3.27641	5.98398	3.50801	4.26375	3.15935	4.3074	4.27831	8.84546	4.38643	6.15926	1.75581	5.73667	6.14221	10.2178	5.85015	6.28909	0.91118	8.93044	6.19241	10.9058	9.04656	2.07157	2.68711	7.26397	2.20472	9.22376	7.28158	0.333103	5.49476	9.37996	0.352489	6.18481	9.33311	5.47472	0.838402	13.437	5.45832	10.8339	13.4385
C_P7_4B	CTL	P7	6	6.74096	5.44961	5.92761	0.152285	5.4736	6.28124	0.160935	3.28144	5.97238	3.58543	4.32637	3.12647	4.39966	4.27981	8.76909	4.45908	6.07007	1.7515	5.8738	6.0606	10.106	5.86867	6.19734	1.00888	8.8858	6.11672	10.7952	9.02275	2.05169	2.71355	7.23426	2.19387	9.18571	7.21078	0.304226	5.55756	9.02119	0.287613	6.21655	9.08254	5.30126	1.00791	13.3149	5.28097	10.7656	13.2562
C_P7_4C	CTL	P7	6	6.8002	5.42784	5.96715	0.153853	5.4293	6.31578	0.171208	3.14229	5.93114	3.57359	4.30369	3.06848	4.49541	4.24042	8.74324	4.52136	6.03135	1.83753	5.78345	6.00336	10.0677	5.88538	6.2997	1.03458	8.9013	6.11505	10.7311	8.98412	2.05753	2.66326	7.25899	2.12509	9.15283	7.30737	0.254039	5.41248	9.12059	0.238407	6.0462	9.13733	5.48179	0.964022	13.2525	5.23142	10.6733	13.3994
C_P7_4D	CTL	P7	6	7.01854	5.42197	5.94691	0.330357	5.43736	6.2841	0.338146	3.35739	5.98872	3.39647	4.44832	3.18308	4.27601	4.43631	8.75504	4.35761	6.30402	1.76447	5.7081	6.27936	10.1582	5.84092	6.36252	1.06265	8.81352	6.27434	10.7755	8.87035	2.27743	2.71101	7.15564	2.35065	9.0698	7.15788	0.448771	5.58357	9.11244	0.432744	6.16625	9.26619	5.37155	1.05599	13.2249	5.42314	10.7244	13.1968
C_P7_4E	CTL	P7	6	7.04553	5.46439	5.96438	0.056191	5.49104	6.33668	0.0605186	3.22164	6.04263	3.46949	4.1928	3.15529	4.32235	4.20141	8.7997	4.48319	6.01967	1.7611	5.74375	5.97205	10.2123	5.92702	6.17914	0.980703	8.81246	6.00718	10.8465	9.09079	2.02929	2.65692	7.19547	2.14577	9.18521	7.34863	0.255924	5.48716	9.19137	0.10075	6.05135	9.128	5.37415	0.919949	13.349	5.3734	10.7486	13.4865
C_P7_4F	CTL	P7	6	6.8437	5.53006	5.97134	0.0469335	5.54005	6.33944	0.0600319	3.24908	6.06379	3.48007	4.26482	3.18331	4.30157	4.20657	8.85948	4.46774	6.0682	1.79879	5.73397	6.04465	10.2076	5.94862	6.19513	0.996904	8.8268	6.06842	10.8359	8.97293	2.09789	2.78603	7.11576	2.12135	9.09868	7.2608	0.292982	5.5606	9.20385	0.29878	6.22743	9.29533	5.37068	0.913847	13.2814	5.40138	10.8316	13.3826
C_P7_5A	CTL	P7	4	6.9903	5.38675	5.94244	0.262364	5.37791	6.2479	0.284057	3.22122	5.92994	3.74326	4.35356	3.15063	4.50939	4.21286	8.69816	4.66098	6.10849	1.85867	5.7665	6.04971	10.0482	5.95515	6.33103	1.06492	8.87097	6.16115	10.6771	9.07064	2.3802	2.59452	7.35321	2.32407	9.11119	7.49802	0.596221	5.55847	9.51788	0.600431	6.08252	9.57781	5.61603	1.00119	13.1821	5.46722	10.6553	13.3674
C_P7_5B	CTL	P7	4	7.25997	5.40595	5.94787	0.0496914	5.41936	6.30633	0.0539592	3.22313	5.96964	3.61066	4.27826	3.02548	4.49234	4.21824	8.81517	4.56174	6.07678	1.70399	5.72045	6.10597	10.1639	5.75978	6.20252	0.952866	8.8993	6.10056	10.8179	9.03548	2.33193	2.52829	7.30813	2.20203	9.16922	7.52381	0.469945	5.5167	9.47257	0.471144	6.13173	9.53718	5.53575	0.962993	13.4189	5.46454	10.7494	13.4879
C_P7_5C	CTL	P7	4	7.27529	5.59313	5.97716	0.110501	5.59345	6.31474	0.131477	3.2488	5.97732	3.63032	4.38228	3.01346	4.39604	4.25565	8.83833	4.54964	6.05905	1.63613	5.72512	5.98494	10.2338	5.90402	6.25565	0.886179	8.84477	6.10726	10.8628	8.9455	2.18045	2.69465	7.26038	2.21489	9.25282	7.45408	0.502658	5.53641	9.59442	0.515013	6.17414	9.64084	5.56349	0.948568	13.4434	5.46042	10.8466	13.5478
C_P7_5D	CTL	P7	4	7.15636	5.46562	5.90473	0.212548	5.47126	6.2374	0.223713	3.25974	5.9981	3.59434	4.36029	3.08398	4.49196	4.28873	8.81467	4.55526	6.097	1.71425	5.83198	6.00214	10.183	5.8395	6.29612	1.0025	8.77997	6.18932	10.873	9.01387	2.22951	2.59004	7.28522	2.17046	9.23147	7.44006	0.468196	5.46347	9.3894	0.467085	6.20032	9.41198	5.60401	1.02977	13.4484	5.5021	10.8204	13.4615
C_P7_6A	CTL	P7	12	6.64571	5.45672	5.91115	0.330904	5.44392	6.24568	0.356549	3.27704	5.99763	3.67254	4.38201	3.1921	4.47059	4.27865	8.81626	4.58439	6.16247	1.88582	5.91179	6.05677	10.0578	5.93124	6.20833	1.15522	8.8705	6.12001	10.7174	9.08594	2.28974	2.49268	7.32257	2.14681	9.41692	7.49217	0.416577	5.44497	8.76517	0.366294	6.32579	8.7621	5.5065	0.9545	13.2477	5.32172	10.7188	13.3809
C_P7_6B	CTL	P7	12	6.40403	5.5097	5.94616	0.377744	5.55302	6.24825	0.391725	3.37104	5.90817	3.75913	4.38802	2.98909	4.66194	4.23223	8.6948	4.67171	6.0975	1.88715	6.04253	5.97266	9.98473	6.0562	6.2456	1.18017	8.92763	6.04794	10.6371	8.99601	2.25908	2.56322	7.35816	2.1237	9.15385	7.46038	0.348271	5.39713	9.06914	0.301332	6.07144	8.99748	5.58735	1.07083	13.2404	5.41612	10.6496	13.2368
C_P7_6C	CTL	P7	12	6.27637	5.61757	5.96085	0.570997	5.61484	6.2994	0.565838	3.41487	6.04161	3.70542	4.42215	3.27621	4.52707	4.33519	8.73473	4.68022	6.05809	2.04512	5.96789	6.03853	9.9513	6.11362	6.13239	1.3538	8.92048	6.06392	10.5625	9.0863	2.31282	2.71702	7.32711	2.31645	9.31266	7.46824	0.37393	5.65775	8.75289	0.326047	6.27337	8.77407	5.28006	1.22022	13.0782	5.34059	10.6723	13.2635
C_P7_6D	CTL	P7	12	6.63249	5.63678	5.87051	0.293667	5.6663	6.24503	0.29467	3.4505	6.0283	3.485	4.43403	3.13963	4.37949	4.39032	8.82871	4.47325	6.20458	1.87888	5.70558	6.1312	10.068	5.93715	6.19218	1.14386	8.755	6.056	10.7402	9.00633	2.24037	2.60229	7.1915	2.1999	9.31133	7.24736	0.352708	5.58463	8.67416	0.315556	6.2252	8.70869	5.4458	0.982279	13.1337	5.29901	10.7337	13.3063
C_P7_6E	CTL	P7	12	6.1437	5.49195	5.96219	0.789695	5.50899	6.28571	0.775196	3.34317	5.91489	3.77845	4.45837	3.13784	4.57428	4.33275	8.60915	4.65914	6.08206	1.91862	6.08453	5.98097	9.85308	6.22349	6.18668	1.1801	8.91965	6.01765	10.4775	9.02982	2.23767	2.56228	7.27634	2.29915	9.16107	7.46088	0.307713	5.5442	8.51217	0.313921	6.17571	8.64441	5.45804	1.13614	13.1577	5.41748	10.6558	13.1645
C_P7_6F	CTL	P7	12	6.34374	5.37402	5.85386	0.583807	5.40195	6.17698	0.539574	3.34963	6.03981	3.75345	4.30579	3.25381	4.59421	4.32218	8.78507	4.67444	6.05877	2.0894	6.01943	6.1229	9.95397	6.17045	6.24189	1.36735	8.88151	6.14518	10.5102	9.05585	2.31012	2.74553	7.26564	2.3849	9.21387	7.43151	0.400892	5.61873	9.01497	0.387032	6.24272	9.03264	5.43214	1.15295	13.1172	5.41711	10.5352	13.2117
LS1_P7_1A	LS1	P7	7	7.96004	5.45326	5.89262	-0.0195971	5.46221	6.24088	-0.0196613	3.35179	5.98393	3.49854	4.39994	3.07375	4.31315	4.30449	8.85141	4.45312	6.07501	1.71666	6.0711	6.00985	10.1838	6.25882	6.19427	1.1567	8.76748	6.02065	10.6815	9.01372	2.20713	2.84242	7.30048	2.20934	9.07565	7.43718	0.652238	5.61047	9.3294	0.63241	6.08859	9.38971	5.49507	1.01532	13.4821	5.25082	10.5657	13.7175
LS1_P7_1B	LS1	P7	7	7.76708	5.56147	5.94259	0.04455	5.56526	6.26737	0.0530184	3.34396	6.00916	3.66379	4.25207	3.13758	4.47639	4.19473	8.82142	4.56782	5.91527	1.79053	6.19148	5.87709	10.1988	6.31506	6.01199	1.16664	8.87384	5.91281	10.698	9.00493	2.06587	2.99217	7.37749	2.17111	8.87074	7.47328	0.644588	5.61412	9.37172	0.646065	6.12407	9.42045	5.38164	1.06473	13.5036	5.34701	10.6395	13.5705
LS1_P7_1C	LS1	P7	7	7.69409	5.59203	5.92756	0.0045033	5.60118	6.26672	0.0125325	3.42014	5.97967	3.4951	4.39356	3.10128	4.30071	4.32586	8.81389	4.42753	6.06796	1.71756	6.19406	6.04187	10.1927	6.15179	6.11902	1.07791	8.71825	5.96433	10.7399	8.92882	2.10338	2.82128	7.23291	2.22217	8.97093	7.32285	0.57664	5.5902	9.33781	0.58243	6.09099	9.33549	5.39805	1.00532	13.5434	5.36378	10.7744	13.5841
LS1_P7_1D	LS1	P7	7	8.12171	5.58614	5.92994	0.00116064	5.60459	6.27597	0.0071852	3.40533	6.01637	3.42541	4.28933	3.09669	4.2892	4.30257	8.88898	4.43555	5.9319	1.67745	6.06062	6.01711	10.2884	6.32226	6.01666	1.02173	8.79238	5.92681	10.848	8.97848	2.04926	2.85995	7.3413	2.13066	9.11869	7.50471	0.545596	5.67488	9.44292	0.53506	6.21364	9.52714	5.34873	0.942938	13.5769	5.35399	10.8896	13.6343
LS1_P7_1E	LS1	P7	7	7.7248	5.56817	5.91068	-0.00240273	5.57656	6.24909	0.00138372	3.4718	5.97202	3.39419	4.37575	3.07136	4.25465	4.33514	8.80234	4.37277	6.04794	1.76591	6.07694	5.96299	10.1441	6.13475	6.12956	1.17716	8.69993	6.00232	10.6329	8.8727	2.15161	2.82096	7.15395	2.2306	8.98651	7.29987	0.557234	5.58757	9.26205	0.533096	6.12304	9.31252	5.41791	1.00383	13.3761	5.39694	10.6628	13.5566
LS1_P7_1F	LS1	P7	7	7.84156	5.62633	6.00781	0.00162437	5.64349	6.34478	0.00807504	3.40711	6.02647	3.56235	4.28594	3.13696	4.31114	4.23014	8.87295	4.47698	6.02903	1.82691	5.83872	5.96253	10.2333	6.28054	6.07998	1.18457	8.64081	5.87043	10.7097	8.91772	2.08706	2.93887	7.26331	2.20292	8.96587	7.41247	0.575807	5.67671	9.3677	0.567327	6.10059	9.4478	5.43798	0.959701	13.4976	5.41988	10.6366	13.6492
LS1_P7_2A	LS1	P7	11	8.00769	5.62972	5.97766	0.0618838	5.6347	6.31041	0.0701188	3.31033	5.89386	3.70635	4.45623	3.00757	4.3921	4.13783	8.72071	4.57773	6.08158	1.6298	6.00807	5.86973	10.0861	6.28879	6.244	0.908058	8.83745	5.87192	10.6476	9.10576	2.26126	2.62695	7.30866	2.04607	8.82576	7.54573	0.574979	5.34386	9.60134	0.488973	5.86191	9.57469	5.73852	0.810182	13.3871	5.36167	10.5574	13.5116
LS1_P7_2B	LS1	P7	11	8.05899	5.44089	5.96749	0.0124151	5.44067	6.30835	0.0190443	3.28423	6.05044	3.62114	4.29997	3.17501	4.47178	4.10418	8.83449	4.58971	5.85647	1.85477	6.11753	5.75457	10.164	6.32745	6.10741	1.11222	8.88734	5.89892	10.684	9.18802	2.16442	2.87937	7.39167	1.96169	9.04089	7.59098	0.612664	5.63455	9.54211	0.558924	6.15473	9.59881	5.48617	1.0319	13.4703	5.27988	10.6959	13.722
LS1_P7_2C	LS1	P7	11	7.61877	5.64864	6.00042	0.0767202	5.6629	6.30441	0.0862748	3.36174	6.06414	3.73294	4.26349	3.16358	4.48294	4.1934	8.80254	4.6023	5.8713	1.9114	6.10801	5.80867	10.0542	6.18271	6.05326	1.17382	8.88941	5.85661	10.684	9.01771	2.0882	2.83478	7.4093	2.08062	8.96228	7.48645	0.578112	5.51987	9.54925	0.49673	6.08445	9.61389	5.5346	1.0949	13.4995	5.50114	10.6803	13.5162
LS1_P7_2D	LS1	P7	11	8.08933	5.56613	6.0091	0.0078826	5.57247	6.32648	0.0129453	3.41418	5.99764	3.60365	4.42842	3.10385	4.38949	4.2383	8.79132	4.5355	6.04725	1.79434	6.1628	5.84873	10.1721	6.23341	6.20646	1.04466	8.8671	5.94564	10.7294	9.06764	2.21069	2.8958	7.23299	2.17249	8.95622	7.39681	0.62363	5.59975	9.39315	0.544272	6.07521	9.3789	5.61528	0.871887	13.4455	5.4917	10.6832	13.6473
LS1_P7_2E	LS1	P7	11	7.78846	5.68475	5.89072	0.0179298	5.68579	6.20715	0.0239303	3.40028	5.98882	3.67611	4.31919	3.14232	4.47645	4.18293	8.78153	4.5185	5.8175	1.8041	6.15763	5.74472	10.1041	6.21795	6.0701	1.13149	8.86453	5.85296	10.6701	8.95765	2.05034	2.93013	7.34266	2.01986	8.95423	7.50533	0.582138	5.58061	9.36431	0.580564	6.13145	9.52153	5.37502	1.05944	13.4282	5.4749	10.6559	13.4964
LS1_P7_2F	LS1	P7	11	7.8883	5.44741	5.96698	0.0121256	5.45879	6.29831	0.0186407	3.34304	6.05046	3.49255	4.28146	3.12441	4.33948	4.19313	8.87239	4.47135	5.8972	1.80577	6.0461	5.84252	10.1922	6.14943	6.06628	1.09785	8.91511	5.97724	10.7287	9.08136	2.03612	2.96629	7.28888	2.09407	8.9751	7.41736	0.55181	5.72787	9.50356	0.569437	6.17023	9.5563	5.53295	0.995965	13.5507	5.55525	10.746	13.6666
LS1_P7_3A	LS1	P7	15	6.74979	5.43977	6.04235	1.01053	5.45105	6.34409	0.981237	3.51742	6.05615	4.22085	4.56293	3.26768	4.97001	4.39874	8.76686	5.10303	6.09427	2.15309	6.46912	5.97737	9.85508	6.62655	6.14595	1.50912	8.9437	5.96984	10.2821	9.17815	2.60869	2.96765	7.62454	2.48115	8.85961	7.71961	0.905947	5.51964	9.35539	0.865593	5.92542	9.48865	5.38544	1.3343	12.8965	5.19144	10.3353	13.0546
LS1_P7_3B	LS1	P7	15	6.70541	5.49376	5.91052	0.6038	5.54911	6.24524	0.62374	3.56436	6.01874	4.0011	4.56776	3.2229	4.78292	4.56853	8.71686	4.86408	6.12592	2.06916	6.37954	6.21101	9.85264	6.4163	6.10365	1.46614	8.98618	6.02751	10.3565	8.95873	2.53399	2.89952	7.60989	2.52807	9.01278	7.63068	0.935176	5.64439	9.35786	0.938951	6.11907	9.39325	5.4241	1.33334	13.0694	5.40481	10.4481	13.1064
LS1_P7_3C	LS1	P7	15	6.6016	5.52673	5.96584	0.927499	5.51693	6.2868	0.925955	3.54267	5.94489	4.15313	4.61429	3.1879	4.92662	4.43287	8.69939	5.11994	6.18718	2.07407	6.31659	6.07712	9.79613	6.61642	6.25348	1.51322	8.97721	5.98029	10.2025	9.13892	2.66078	2.76992	7.52982	2.56029	8.93412	7.78081	0.877847	5.38044	9.33387	0.854493	5.89245	9.43733	5.51249	1.22358	12.8883	5.36195	10.316	12.9904
LS1_P7_3D	LS1	P7	15	6.62501	5.56771	5.9482	0.858694	5.57268	6.25908	0.868155	3.52274	5.96306	4.09728	4.61315	3.2396	4.76617	4.45112	8.59713	4.87681	6.05695	2.05224	6.32963	5.9689	9.79591	6.5096	6.14033	1.38778	8.88514	5.8757	10.2839	9.12156	2.39493	2.93903	7.39545	2.45926	8.74431	7.54619	0.838929	5.54015	9.31099	0.809143	5.94731	9.33486	5.35766	1.20615	12.979	5.21168	10.3739	13.0941
LS1_P7_3E	LS1	P7	15	6.53646	5.4791	5.901	0.813164	5.53547	6.21988	0.821198	3.47514	5.99069	4.14359	4.53382	3.2068	4.79237	4.39714	8.67599	4.91066	6.03268	2.09228	6.26809	5.97397	9.86263	6.45301	6.15276	1.59662	8.96294	6.00243	10.3007	9.09227	2.49515	2.98216	7.45053	2.48776	8.8166	7.64727	0.803247	5.59201	9.39732	0.796274	6.05671	9.46663	5.29479	1.29075	12.9414	5.2608	10.3938	12.9923
LS1_P7_3F	LS1	P7	15	6.7639	5.55654	5.99288	1.07444	5.58356	6.298	1.0651	3.57661	5.99224	4.26589	4.63625	3.31763	4.86928	4.4436	8.6636	5.00557	6.1426	2.17958	6.45685	5.96558	9.8676	6.67655	6.06386	1.53603	9.0376	5.91167	10.3178	9.14706	2.47524	3.01968	7.48907	2.41325	8.83896	7.70672	0.771666	5.63153	9.49579	0.749558	6.06198	9.5527	5.36299	1.24333	12.8826	5.19422	10.4052	13.059
LS1_P7_4A	LS1	P7	11	6.88877	5.54445	5.96377	0.370897	5.55345	6.27856	0.359598	3.41762	6.01555	3.88004	4.37448	3.21979	4.69849	4.29377	8.74355	4.75106	5.97218	2.03217	6.16604	5.93882	9.93855	6.24083	6.05299	1.25865	8.95232	5.94177	10.5157	9.05366	2.23718	3.03619	7.38936	2.2635	8.88311	7.55228	0.695587	5.61482	9.50425	0.728053	6.06427	9.4732	5.41037	1.14855	13.2427	5.37807	10.5106	13.3063
LS1_P7_4B	LS1	P7	11	7.14769	5.64717	5.89312	0.353566	5.65358	6.22464	0.366635	3.43584	6.0234	3.76173	4.30618	3.27126	4.6678	4.28175	8.79436	4.68769	5.93656	2.03544	6.26481	5.89491	10.0759	6.41289	5.96862	1.33217	8.92986	5.88345	10.5564	8.9517	2.15579	3.11516	7.46897	2.18152	8.93184	7.53762	0.699275	5.70565	9.5176	0.675465	6.11797	9.453	5.33466	1.2283	13.1873	5.2418	10.5817	13.3453
LS1_P7_4C	LS1	P7	11	7.01406	5.66468	5.94079	0.345097	5.66664	6.24986	0.350075	3.50479	5.97474	3.73078	4.46635	3.12296	4.59741	4.30804	8.73831	4.69297	5.98097	1.89595	6.28391	5.89343	10.0291	6.3608	6.08987	1.27868	8.93451	5.85699	10.5374	9.08198	2.28252	2.8475	7.37896	2.20228	8.95388	7.556	0.635648	5.57705	9.42614	0.621684	6.03939	9.53509	5.40851	1.17743	13.1922	5.25207	10.5078	13.3414
LS1_P7_4D	LS1	P7	11	7.28925	5.5994	6.0336	0.222861	5.58955	6.35977	0.229389	3.43007	5.90766	3.83294	4.49665	3.1084	4.647	4.19063	8.74378	4.82736	6.03002	1.97905	6.18196	5.75417	9.9551	6.37388	6.08723	1.32971	8.94126	5.89976	10.4438	9.1201	2.34797	2.87208	7.41862	2.16693	8.81195	7.64867	0.648631	5.48602	9.44465	0.668273	5.91547	9.57038	5.31532	1.24779	13.2951	5.32247	10.4922	13.3097
LS1_P7_4E	LS1	P7	11	7.01276	5.6871	5.94689	0.21372	5.68535	6.27112	0.227122	3.45979	5.99929	3.68472	4.38375	3.21346	4.63145	4.26976	8.74874	4.7449	5.95395	2.00052	6.12262	5.86858	9.93513	6.36651	6.06444	1.34688	8.75184	5.81084	10.5135	9.13773	2.29538	2.86778	7.40659	2.10977	8.87147	7.53239	0.678915	5.54842	9.47035	0.663806	6.04869	9.44864	5.53319	1.15629	13.1304	5.33048	10.4956	13.4014
LS1_P7_4F	LS1	P7	11	6.84472	5.70741	5.88835	0.250036	5.72209	6.26381	0.271282	3.42374	5.98837	3.78615	4.39536	3.15008	4.70094	4.3096	8.75115	4.7362	5.9444	1.96076	6.3054	5.94792	9.94831	6.33057	5.99085	1.35549	8.94857	5.90164	10.46	9.08945	2.25786	2.98808	7.36716	2.26166	8.97713	7.527	0.650889	5.68901	9.3962	0.712118	6.1708	9.41178	5.23867	1.31868	13.2935	5.37226	10.5541	13.3367
LS1_P7_5A	LS1	P7	12	7.65246	5.62383	5.99829	0.0178089	5.64937	6.32389	0.0209843	3.41417	5.99865	3.62795	4.36843	3.09898	4.37189	4.28884	8.80919	4.58274	5.97248	1.79968	6.14207	5.88918	10.091	6.26073	6.01368	1.06598	8.85835	5.86063	10.6781	9.02047	2.14697	2.90943	7.38472	2.26463	8.89909	7.52956	0.682733	5.59314	9.42981	0.667143	6.08791	9.59307	5.46565	0.946639	13.4247	5.39403	10.6283	13.5915
LS1_P7_5B	LS1	P7	12	7.90216	5.54751	5.99816	-0.00777346	5.55705	6.32784	0.00125634	3.2909	6.03602	3.4987	4.27234	3.15494	4.31932	4.11169	8.84443	4.45887	5.89776	1.85788	6.05956	5.76079	10.1558	6.10093	6.01987	1.09736	8.85435	5.84514	10.7521	9.01776	2.0318	2.89663	7.25534	1.9891	8.85053	7.38278	0.533143	5.55162	9.38721	0.532755	6.05722	9.38878	5.55783	0.925636	13.4598	5.34039	10.6219	13.6309
LS1_P7_5C	LS1	P7	12	8.05201	5.48825	5.91915	0.00832539	5.5008	6.26399	0.00903306	3.40593	5.99517	3.54593	4.31216	3.15916	4.36783	4.19208	8.81884	4.45586	5.96483	1.79174	6.02813	5.83307	10.177	6.14516	6.04391	1.20868	8.92677	5.85273	10.6733	9.03024	2.26498	2.84022	7.44904	2.26956	8.98924	7.44741	0.626765	5.65403	9.49755	0.594719	6.15638	9.5371	5.46625	1.06259	13.5284	5.28698	10.6326	13.6453
LS1_P7_5D	LS1	P7	12	7.91948	5.53669	5.97832	0.0084134	5.55033	6.32664	0.0136593	3.36984	5.98966	3.47819	4.37162	3.1383	4.35848	4.24375	8.82974	4.49626	5.93358	1.79705	5.96456	5.87498	10.0729	6.20873	5.99342	1.1563	8.89334	5.86336	10.648	9.05147	2.13109	2.81596	7.29294	2.17643	8.99523	7.47862	0.494761	5.60479	9.48403	0.483407	6.06666	9.53518	5.45427	1.03543	13.4709	5.39264	10.6569	13.6272
LS1_P7_5E	LS1	P7	12	7.68245	5.57469	5.96524	0.0342831	5.59093	6.28032	0.0381561	3.39492	6.02048	3.59211	4.29435	3.17932	4.45252	4.20107	8.73849	4.55491	5.88954	1.89373	6.25795	5.75624	10.0873	6.20815	6.03988	1.23246	8.92737	5.88822	10.5723	9.0653	2.0549	2.85465	7.44621	2.03483	8.95059	7.55019	0.5745	5.55245	9.43819	0.492241	6.05125	9.55967	5.58183	1.15525	13.4228	5.33349	10.6129	13.5041
LS1_P7_5F	LS1	P7	12	7.81625	5.46107	5.9423	0.0161058	5.48391	6.28007	0.015692	3.35169	6.01491	3.5167	4.19692	3.18687	4.38908	4.20095	8.80192	4.45544	5.84695	1.85436	6.11362	5.86432	10.1307	6.20125	5.95875	1.13309	8.84769	5.8354	10.5738	9.10718	2.06481	2.55121	7.21051	2.0931	8.99911	7.42107	0.578816	5.67009	9.46003	0.600388	6.12147	9.5476	5.50294	1.05425	13.3366	5.45654	10.5771	13.5108
LS1_P7_6A	LS1	P7	6	7.70923	5.55203	5.96954	0.0942163	5.54742	6.29657	0.117321	3.36795	5.96022	3.63782	4.41375	3.05792	4.47141	4.24309	8.89912	4.55058	6.14473	1.74935	6.00201	5.95923	10.213	6.0198	6.11089	1.06668	8.79712	5.89813	10.693	8.95953	2.27948	2.86874	7.28067	2.19435	9.01451	7.41135	0.665963	5.54037	9.38085	0.66978	6.05552	9.39641	5.56195	0.914256	13.2696	5.21814	10.5821	13.5175
LS1_P7_6B	LS1	P7	6	7.65269	5.61642	5.96684	0.1884	5.62548	6.26704	0.184921	3.33136	6.00796	3.76198	4.32675	3.03903	4.59199	4.24207	8.84337	4.66626	6.02174	1.79826	6.16846	5.97556	10.1628	6.24006	6.09725	1.12865	8.85075	5.953	10.6612	9.02387	2.16855	2.69603	7.24414	2.1247	8.97925	7.54047	0.576429	5.5642	9.49599	0.553149	6.05314	9.54106	5.37695	1.13807	13.3143	5.33101	10.6537	13.4386
LS1_P7_6C	LS1	P7	6	7.53312	5.5236	5.93257	0.162509	5.5164	6.28123	0.192932	3.35327	5.88217	3.63443	4.47769	2.92651	4.57245	4.20216	8.82997	4.70463	5.9648	1.70139	6.08076	5.85221	10.1382	6.23779	6.11396	1.06843	8.89999	5.90032	10.6598	9.01267	2.24821	2.74975	7.30366	2.12241	8.95586	7.49741	0.628696	5.50209	9.27714	0.62414	5.98606	9.37315	5.41737	1.03516	13.3954	5.21094	10.6684	13.3988
LS1_P7_6D	LS1	P7	6	7.60595	5.52839	5.8984	0.105868	5.53517	6.22449	0.123622	3.34715	5.9356	3.65592	4.41808	2.99945	4.4293	4.27205	8.85505	4.61623	6.04072	1.73974	6.01125	5.94639	10.1625	6.18804	6.1453	1.13371	8.82373	5.95203	10.7475	9.04903	2.16272	2.85144	7.22407	2.13255	8.97815	7.44358	0.705852	5.52797	9.30986	0.741944	6.00008	9.31346	5.42258	1.00761	13.2797	5.33437	10.6365	13.4866
LS1_P7_6E	LS1	P7	6	7.53562	5.64603	5.98748	0.142325	5.65561	6.29124	0.150628	3.33443	5.98222	3.66197	4.35626	3.10599	4.50966	4.24063	8.84111	4.70592	6.06895	1.8313	6.17031	5.90847	10.1453	6.23236	6.06499	1.01316	8.72182	5.91092	10.7051	9.03672	2.15502	2.86356	7.32765	2.20905	8.96938	7.40667	0.601091	5.59121	9.44939	0.578274	6.03329	9.50664	5.38589	1.09553	13.2742	5.38923	10.6255	13.4543
LS1_P7_6F	LS1	P7	6	7.67651	5.66781	5.99426	0.0788518	5.6734	6.30481	0.0943565	3.40345	6.01969	3.54847	4.37797	3.05186	4.42218	4.29991	8.88391	4.54726	5.97232	1.76658	5.96216	6.0198	10.1535	6.0933	5.97577	1.12216	8.75999	5.92044	10.6626	8.89149	2.07961	2.93544	7.21317	2.1741	8.98591	7.32558	0.615036	5.60112	9.25	0.621116	6.09812	9.28947	5.30293	1.11943	13.3109	5.29445	10.5997	13.3996
LS2_P7_1A	LS2	P7	13	6.61284	5.67419	6.01031	0.973266	5.67541	6.28157	1.02311	3.61899	6.00508	4.08831	4.59477	3.2459	4.92619	4.51034	8.63068	5.04919	6.10364	2.18877	6.37705	6.07985	9.66402	6.44994	6.10278	1.5856	8.92374	5.94333	10.1088	9.01376	2.43364	2.9002	7.57856	2.56471	8.92363	7.712	0.697566	5.55489	9.42321	0.697138	6.11826	9.38465	5.34582	1.2732	13.0927	5.3763	10.3049	13.0673
LS2_P7_1B	LS2	P7	13	6.66009	5.56036	5.96598	0.796949	5.58702	6.29468	0.799706	3.48871	6.01266	3.88452	4.41006	3.2973	4.76006	4.34209	8.65064	4.8399	6.05386	2.03803	6.40427	5.98627	9.87427	6.38764	5.93596	1.53558	8.98371	5.86905	10.3463	9.05853	2.36842	2.90395	7.54706	2.40053	8.97982	7.58466	0.663943	5.58499	9.16223	0.529458	6.13711	9.09377	5.32418	1.30033	13.1421	5.29444	10.5656	13.1277
LS2_P7_1C	LS2	P7	13	6.77219	5.5216	5.94075	0.983983	5.53056	6.25508	1.00305	3.53382	5.99348	4.07753	4.55002	3.29815	4.90634	4.39734	8.66426	4.996	6.11672	2.16895	6.32723	6.02088	9.76221	6.39669	6.00922	1.60441	8.89678	5.92956	10.2387	9.00149	2.49439	2.98198	7.59409	2.52451	8.89816	7.68019	0.832501	5.51851	9.42379	0.793116	6.14758	9.43738	5.52955	1.29113	12.9758	5.44448	10.5037	13.0621
LS2_P7_1D	LS2	P7	13	6.7837	5.6102	5.90954	0.975954	5.63463	6.22874	0.978883	3.53346	5.98857	4.15402	4.48415	3.31909	4.92338	4.42633	8.60194	5.00368	6.03083	2.11366	6.42526	6.04228	9.72273	6.38972	6.06452	1.71632	8.86312	5.89047	10.2394	9.0134	1.78535	2.83823	7.71768	2.4294	8.89874	7.72806	0.726457	5.54807	9.37267	0.649195	6.22522	9.47654	5.35462	1.28994	13.0434	5.4106	10.4255	13.1414
LS2_P7_1E	LS2	P7	13	7.74236	5.72811	5.95708	1.28274	5.74152	6.27665	1.319	3.63638	5.95448	4.19287	4.54302	3.32157	5.00699	4.45745	8.54072	5.10644	6.06609	2.23534	6.42999	5.9307	9.61052	6.52294	5.98958	1.7156	8.8492	5.80726	10.0173	9.02077	2.45408	2.98842	7.48587	2.49389	8.78504	7.73472	0.779888	5.47411	9.42405	0.739229	6.01836	9.37811	5.35886	1.41363	12.8928	5.23325	10.2672	12.9626
LS2_P7_1F	LS2	P7	13	6.871	5.81606	5.77371	0.803364	5.81075	6.01339	0.799343	3.6094	5.99189	3.85124	4.54804	3.26961	4.80031	4.46758	8.7054	4.92126	6.0319	2.06494	6.24062	6.02003	9.81411	6.33133	6.03188	1.49204	8.87562	5.88265	10.2455	9.00786	2.449	2.96178	7.43879	2.445	8.91202	7.56761	0.780345	5.52829	9.09989	0.747911	6.18587	9.14918	5.41056	1.16909	13.0458	5.31071	10.4654	13.084
LS2_P7_2A	LS2	P7	12	7.10398	5.46524	5.96329	0.676163	5.50376	6.30871	0.690255	3.4796	6.04423	3.98792	4.37865	3.27929	4.82839	4.39331	8.76576	4.9239	5.97912	2.05484	6.30061	6.02381	9.93338	6.39709	6.03754	1.48614	8.84255	5.95416	10.3564	8.95374	2.31136	3.09414	7.6048	2.42893	8.85974	7.68807	0.841111	5.72518	9.49385	0.743125	6.10106	9.45959	5.47709	1.22332	13.1656	5.43807	10.4594	13.321
LS2_P7_2B	LS2	P7	12	6.99596	5.64857	5.90367	0.792598	5.63997	6.22144	0.808529	3.54825	5.95821	3.9649	4.6131	3.2608	4.72646	4.41076	8.63049	4.80529	6.23891	2.20367	6.12665	5.93793	9.85599	6.18588	6.02132	1.42532	8.85093	5.87963	10.3984	9.0353	2.58208	2.94605	7.43048	2.49863	8.80873	7.60049	0.921399	5.59709	9.28155	0.932598	6.02438	9.35636	5.49379	1.15731	13.0003	5.42765	10.4226	13.0366
LS2_P7_2C	LS2	P7	12	7.0745	5.72648	6.01174	0.532326	5.73618	6.30645	0.548038	3.44468	5.9849	3.73788	4.57133	3.08722	4.51922	4.40947	8.75982	4.71726	6.09487	2.01347	5.98423	5.98987	9.90207	6.19233	6.012	1.3611	8.81721	5.84793	10.3987	8.97165	2.32216	2.8429	7.39378	2.34087	8.89439	7.56458	0.725787	5.5289	9.25834	0.667503	6.03392	9.39674	5.42531	1.12938	13.0798	5.35666	10.5087	13.2299
LS2_P7_2D	LS2	P7	12	6.97683	5.70309	5.89247	0.643269	5.71498	6.21056	0.634125	3.52543	5.94922	3.85705	4.54338	3.18401	4.56655	4.41952	8.70292	4.66508	6.11753	1.97969	5.98803	5.99949	9.95997	6.15036	6.015	1.33224	8.76935	5.83583	10.4565	8.92579	2.36923	2.95758	7.37989	2.32775	8.84043	7.50262	0.749365	5.60997	9.30943	0.689769	6.07014	9.3305	5.41332	1.15044	13.0506	5.28106	10.5868	13.1304
LS2_P7_2E	LS2	P7	12	7.11196	5.61388	5.98058	0.670491	5.60865	6.31759	0.684666	3.4837	6.01836	3.77778	4.41394	3.25184	4.69026	4.29269	8.70146	4.78017	5.93576	2.02055	6.254	5.86677	9.9325	6.30721	5.99745	1.44686	8.8208	5.83353	10.3556	8.94225	2.32206	2.96014	7.52555	2.3025	8.9145	7.64298	0.717528	5.60297	9.41578	0.688172	6.0675	9.51881	5.31245	1.2375	13.0985	5.26062	10.4745	13.2144
LS2_P7_2F	LS2	P7	12	7.09978	5.60011	6.00798	0.623286	5.60984	6.3181	0.64016	3.50657	6.02668	3.85906	4.37751	3.11336	4.71479	4.35962	8.72981	4.80414	5.98205	2.00946	6.15944	6.05342	9.8976	6.39301	6.00772	1.44285	8.88672	5.87614	10.3495	8.98339	2.27328	3.03727	7.50417	2.36318	8.86133	7.61124	0.743392	5.65584	9.47386	0.766919	6.08044	9.60146	5.34656	1.29563	13.063	5.25132	10.3638	13.1951
LS2_P7_3A	LS2	P7	14	6.75232	5.5611	5.92618	1.05531	5.56225	6.24019	1.06545	3.51514	5.94196	4.05134	4.50264	3.21698	4.84354	4.30475	8.58185	4.97226	6.07871	2.13493	6.34569	5.94629	9.69979	6.27576	6.03866	1.62406	8.88922	5.77729	10.1308	8.97834	2.3262	2.80526	7.47895	2.36162	8.84311	7.70488	0.649573	5.4305	9.19892	0.603207	6.03902	9.26855	5.26285	1.36025	12.9942	5.18455	10.3229	13.0833
LS2_P7_3B	LS2	P7	14	7.03845	5.62567	5.88682	0.944034	5.65292	6.17381	0.915311	3.60411	5.96015	3.99047	4.53842	3.16276	4.82309	4.41206	8.66678	4.8849	6.09557	2.13358	6.29983	6.00077	9.84491	6.36287	5.86886	1.62735	8.81774	5.86492	10.3146	8.91351	2.26972	3.05413	7.51508	2.36514	8.90036	7.5591	0.612877	5.71041	9.32535	0.655607	6.20813	9.37071	5.2372	1.38219	12.8974	5.3128	10.4167	13.0475
LS2_P7_3C	LS2	P7	14	6.82607	5.71485	5.8664	0.99216	5.72177	6.21435	1.03447	3.5901	5.98207	4.0005	4.52942	3.2848	4.88618	4.43243	8.65593	4.94888	6.04885	2.24922	6.3078	6.04545	9.72486	6.44706	5.89326	1.72567	8.83611	5.74916	10.1587	8.84417	2.29813	3.0072	7.50809	2.30012	8.89706	7.59923	0.650288	5.65939	9.05647	0.584062	6.13785	9.14322	5.14979	1.44193	12.8592	5.22597	10.353	12.9118
LS2_P7_3D	LS2	P7	14	6.49452	5.6372	5.91395	1.22734	5.64267	6.20629	1.23459	3.64145	6.02062	4.08449	4.53935	3.28657	4.90282	4.46582	8.6585	4.97832	6.16345	2.18401	6.45598	6.1318	9.68443	6.49039	5.96978	1.73926	8.82971	5.77558	10.1547	8.96913	2.35671	3.02252	7.41148	2.35965	8.84809	7.65792	0.482651	5.70214	9.1405	0.544223	6.16999	9.20155	5.12567	1.42287	12.8934	5.08543	10.3377	12.8846
LS2_P7_3E	LS2	P7	14	6.62569	5.74126	5.98653	1.03312	5.7524	6.3056	1.04371	3.65124	6.00869	4.00549	4.57843	3.35314	4.86653	4.44947	8.62886	5.02965	6.07837	2.28947	6.19112	6.02627	9.66347	6.49572	6.01849	1.68101	8.81891	5.8728	10.0562	8.96751	2.52955	2.94857	7.46464	2.42156	8.86586	7.68905	0.68876	5.55514	9.16948	0.647092	6.01149	9.14722	5.29444	1.2893	12.8758	5.13257	10.2032	12.9648
LS2_P7_3F	LS2	P7	14	6.64403	5.60793	5.92347	0.991641	5.63272	6.22281	0.977535	3.64037	6.04141	4.05234	4.55099	3.28656	4.92457	4.55051	8.70449	5.05535	6.18954	2.23271	6.23287	6.20204	9.80148	6.48532	6.1026	1.65712	8.77285	5.92637	10.1944	9.01734	2.48104	2.80561	7.3587	2.54103	8.81702	7.70456	0.732657	5.6381	9.29048	0.708668	6.03302	9.33115	5.33626	1.32942	12.9157	5.40933	10.3531	13.0407
LS2_P7_4A	LS2	P7	7	7.89386	5.86516	6.02923	0.338321	5.8561	6.34903	0.344275	3.48329	5.99273	3.65827	4.51097	3.08275	4.46735	4.29599	8.84445	4.6661	6.0848	1.8656	5.88363	5.86296	10.0756	6.12788	6.07363	1.17325	8.7679	5.70567	10.5582	9.04554	2.26864	2.78035	7.29253	2.12143	8.84592	7.52617	0.636458	5.4337	9.34465	0.63918	5.93698	9.39836	5.52736	0.964659	13.4025	5.26741	10.6033	13.535
LS2_P7_4B	LS2	P7	7	7.6762	5.76326	5.92915	0.414483	5.78224	6.23228	0.420423	3.4622	6.01951	3.84044	4.34352	3.11672	4.59083	4.36942	8.85925	4.71757	5.89588	1.85354	5.89116	5.9613	10.0485	5.95264	5.95375	1.1519	8.86226	5.88504	10.6084	8.94235	2.20502	2.88539	7.47115	2.41651	8.96492	7.57141	0.765538	5.65658	9.33713	0.780857	6.16621	9.32475	5.49954	1.07262	13.429	5.42614	10.6256	13.3552
LS2_P7_4C	LS2	P7	7	7.68518	5.69855	5.90935	0.365224	5.69516	6.23885	0.380506	3.39001	6.00664	3.82528	4.32503	3.19419	4.64413	4.28976	8.75036	4.71687	6.01172	1.93321	6.05786	5.94658	9.99582	6.07291	6.04393	1.24424	8.82889	5.89257	10.596	8.96853	2.28203	2.93924	7.5806	2.31265	8.90485	7.65038	0.790847	5.63019	9.53923	0.810361	6.12045	9.54237	5.48518	1.08577	13.3312	5.4957	10.5163	13.3381
LS2_P7_4D	LS2	P7	7	7.8901	5.65593	5.86987	0.271778	5.65033	6.20392	0.284012	3.40131	5.97205	3.6969	4.36247	3.11724	4.50014	4.32083	8.86638	4.5955	6.01878	1.78158	6.10603	5.93648	10.1834	6.19476	6.06026	1.09046	8.81823	5.91884	10.6908	9.01177	2.32175	2.83459	7.43266	2.30468	8.9421	7.62087	0.816721	5.49506	9.55036	0.853249	5.99585	9.53164	5.62444	1.00675	13.4197	5.46608	10.6427	13.4884
LS2_P7_4E	LS2	P7	7	7.77623	5.80781	5.95946	0.446386	5.83089	6.26687	0.434614	3.61817	5.90963	3.71863	4.55722	3.10365	4.52735	4.44869	8.7688	4.64558	6.18386	1.80096	6.02341	6.14095	9.95273	6.1726	6.18294	1.11589	8.7444	6.02842	10.5573	8.94814	2.36097	2.8389	7.46528	2.49117	8.98751	7.56674	0.979633	5.49698	9.19252	0.930822	6.09192	9.35826	5.49208	1.09392	13.3408	5.58535	10.6328	13.4166
LS2_P7_4F	LS2	P7	7	7.68827	5.59693	5.97252	0.302593	5.60383	6.30293	0.319233	3.32916	6.01736	3.86557	4.37503	3.12107	4.59322	4.31554	8.81409	4.77485	6.01693	1.84759	5.99164	5.94648	10.0709	6.13649	6.10367	1.21062	8.85759	5.94441	10.5885	8.99082	2.36679	2.78266	7.56112	2.39269	8.95961	7.65549	0.801974	5.45463	9.31124	0.824295	6.05081	9.21366	5.5615	1.04532	13.3993	5.47992	10.6138	13.3824
LS2_P7_5A	LS2	P7	9	8.57037	5.66393	5.96598	0.0437109	5.67343	6.26567	0.0515352	3.41138	5.95832	3.67094	4.39143	3.18835	4.42829	4.16696	8.69898	4.57274	6.1035	1.73448	5.99976	5.90116	10.0908	6.13306	6.13706	1.06183	8.85311	5.80482	10.6175	9.17925	2.23338	2.74428	7.42123	2.05642	8.93529	7.72455	0.607601	5.49043	9.48693	0.612127	5.94448	9.53777	5.57299	0.91744	13.6007	5.30426	10.5733	13.7336
LS2_P7_5B	LS2	P7	9	8.56672	5.75367	5.94228	-0.0209177	5.77025	6.28724	-0.019469	3.51188	6.03548	3.35826	4.50039	3.16705	4.11807	4.51188	8.88325	4.22885	6.07207	1.90133	5.42078	6.18035	10.0252	5.44833	6.00838	1.01354	8.73091	6.10869	10.8363	8.87711	2.31226	2.81872	7.152	2.35547	9.18309	7.30385	0.811492	5.71485	9.04003	0.79246	6.25673	8.95061	5.49263	0.888627	13.4757	5.64248	10.9112	13.6007
LS2_P7_5C	LS2	P7	9	8.36695	5.63316	5.95125	0.0367419	5.64926	6.27176	0.0383601	3.40071	6.03318	3.53654	4.36807	3.13649	4.3309	4.28737	8.91044	4.45909	5.98335	1.94326	5.60934	5.98357	10.1138	5.69385	5.96305	1.02871	8.88644	5.89354	10.7634	8.97218	2.1741	2.83065	7.36036	2.24221	9.11279	7.47474	0.645479	5.65778	9.30997	0.634	6.10707	9.32694	5.55578	0.947915	13.548	5.29479	10.8545	13.4087
LS2_P7_5D	LS2	P7	9	8.88923	5.55186	5.91923	0.0137903	5.56376	6.25294	0.0193124	3.40478	6.02757	3.62055	4.36908	3.13823	4.39741	4.21938	8.80407	4.47483	5.96128	1.80725	5.90088	5.92082	10.2123	6.04931	6.13659	1.11788	8.9011	5.92504	10.7826	9.0877	2.20164	2.69926	7.44036	2.14801	9.04579	7.59843	0.602039	5.57785	9.52875	0.595653	6.09249	9.57046	5.67502	0.977533	13.6323	5.507	10.8169	13.7524
LS2_P7_5E	LS2	P7	9	8.46934	5.57136	5.97107	0.0306488	5.59813	6.26672	0.043397	3.27226	5.95154	3.57503	4.27939	3.14978	4.28997	4.14658	8.73134	4.43141	5.95404	1.88569	5.57872	5.89932	10.0509	5.73162	6.05694	1.04114	8.79113	5.84235	10.7724	8.95555	2.16889	2.7493	7.34102	2.12974	9.04225	7.48791	0.616049	5.58832	9.15848	0.578605	6.10325	9.41886	5.55226	0.905337	13.5226	5.50199	10.8014	13.6647
LS2_P7_5F	LS2	P7	9	8.76618	5.56343	5.89513	-0.0096748	5.5879	6.23719	-0.0111147	3.38995	5.95023	3.44849	4.34198	3.09596	4.34525	4.3071	8.79905	4.43803	6.00411	1.78561	5.78757	6.00443	10.102	5.81124	6.05326	1.10883	8.94383	5.96122	10.7591	9.05429	2.19319	2.63646	7.26826	2.22846	9.14675	7.4954	0.507101	5.63883	9.25907	0.494016	6.15419	9.22888	5.38654	0.999133	13.7149	5.48885	10.8386	13.7052
LS2_P7_6A	LS2	P7	16	7.01319	5.64416	5.91931	0.86257	5.65687	6.22842	0.860887	3.68548	5.95039	4.05404	4.61946	3.27601	4.84986	4.49671	8.62283	4.98292	6.10296	2.13352	6.14878	6.12458	9.75472	6.32428	6.08696	1.53714	8.8605	5.92389	10.2176	9.11392	2.45792	2.93441	7.60002	2.40718	8.79251	7.74235	0.762048	5.55392	9.41122	0.70819	6.05332	9.49075	5.42017	1.33188	13.0904	5.30285	10.4943	13.1092
LS2_P7_6B	LS2	P7	16	6.40519	5.55189	5.9445	1.11131	5.5794	6.31024	1.08557	3.61541	5.96963	4.16663	4.53156	3.3265	4.91267	4.39689	8.66408	4.97654	5.93957	1.96331	6.29102	6.03801	9.68647	6.34747	5.93692	1.51674	8.90689	5.84904	10.0689	9.08425	2.54327	2.9902	7.56461	2.46604	8.87617	7.55398	0.690118	5.565	9.33844	0.667954	6.07891	9.38518	5.47973	1.43762	12.8311	5.22963	10.3705	12.8035
LS2_P7_6C	LS2	P7	16	6.93772	5.61699	5.99	0.930448	5.59483	6.32359	0.960372	3.67968	5.96345	4.1187	4.69293	3.27734	4.78867	4.47977	8.67036	5.01676	6.28306	2.10541	6.15156	6.10481	9.76446	6.39119	6.16826	1.44036	8.79861	5.90117	10.2234	9.09137	2.61825	2.77059	7.47256	2.31572	8.8343	7.70801	0.744537	5.48027	9.21159	0.719975	6.05839	9.25748	5.52167	1.14736	12.9709	5.27809	10.3644	13.1342
LS2_P7_6D	LS2	P7	16	6.71147	5.60529	6.01827	1.04671	5.60126	6.31496	1.05761	3.70933	5.99265	4.16707	4.62218	3.28972	4.96151	4.53003	8.66023	5.07934	6.06466	2.17412	6.20219	6.08889	9.7702	6.36601	6.06713	1.59701	8.9063	5.98325	10.2383	8.97372	2.47498	2.96487	7.5916	2.49536	8.93197	7.7051	0.718116	5.61179	9.41754	0.704465	6.16132	9.53938	5.31766	1.32393	12.9273	5.41798	10.5327	12.97
LS2_P7_6E	LS2	P7	16	6.62578	5.46481	5.90244	1.20152	5.46482	6.23676	1.19672	3.74777	5.98428	4.26565	4.62762	3.36965	4.96603	4.57419	8.56924	5.06551	6.20761	2.21139	6.3107	6.16392	9.80662	6.39498	6.17599	1.61994	8.96569	6.03789	10.2569	9.04573	2.61206	2.8956	7.67889	2.56692	8.84752	7.84623	0.81213	5.52307	9.48644	0.828658	6.02853	9.55207	5.42416	1.2664	12.8734	5.37615	10.4286	13.0472
LS2_P7_6F	LS2	P7	16	6.76048	5.53928	5.80662	1.00915	5.57789	6.14038	0.930273	3.62902	5.92179	4.17502	4.53534	3.33218	4.83679	4.50553	8.55005	4.96961	6.09303	2.01102	6.24776	6.10517	9.69086	6.27481	5.95145	1.46932	8.90197	5.90414	10.2293	9.0927	2.42908	3.04654	7.50423	2.45698	8.91006	7.63173	0.57384	5.67537	9.47081	0.522877	6.22593	9.55757	5.34294	1.27448	12.9198	5.26137	10.4772	13.0959
[truncated: 105 more columns]
