# Supplementary material for: Selection for increased tibia length in mice alters skull shape through parallel changes in developmental mechanisms
Source: eLife. 2021 Apr 26;10:e67612. doi: 10.7554/eLife.67612 (PMC8118654; doi:10.7554/eLife.67612)
Supplement: Figure 6—source data 1. [file elife-67612-fig6-data1.xlsx]

## Sheet: Sheet1
ID	Line	Age	Litter Size	Tibia	1.X	1.Y	1.Z	2.X	2.Y	2.Z	3.X	3.Y	3.Z	4.X	4.Y	4.Z	5.X	5.Y	5.Z	6.X	6.Y	6.Z	7.X	7.Y	7.Z	8.X	8.Y	8.Z	9.X	9.Y	9.Z	10.X	10.Y	10.Z	11.X	11.Y	11.Z	12.X	12.Y	12.Z
C_P7_1A	CTL	P7	4	7.04899	440.941	355.93	881.016	402.669	352.077	734.698	400.197	351.986	717.009	369.7	349.27	581.984	359.679	347.958	559.445	318.079	342.706	455.789	179.858	320.718	347.552	430.446	356.989	730.775	425.566	356.508	711.586	387.611	352.525	574.886	381.271	351.803	555.011	348.633	348.243	444.482
C_P7_1B	CTL	P7	4	7.28909	443.211	346.498	870.282	403.325	347.71	722.036	400.799	348.151	703.245	361.673	348.846	570.582	350.576	348.64	543.331	305.949	347.433	443.54	155.87	334.87	327.041	428.063	350.652	718.777	424.232	351.02	698.051	379.34	351.253	560.358	370.866	351.105	539.323	334.279	351.24	428.534
C_P7_1C	CTL	P7	4	7.53954	458.938	324.595	899.497	416.023	329.333	752.273	412.467	329.592	733.767	376.618	333.326	600.203	366.531	334.711	578.477	323.676	340.39	476.32	169.262	366.232	362.965	442.251	324.429	747.188	438.014	324.797	727.96	396.631	329.511	592.872	385.851	331.038	571.856	353.149	334.671	460.738
C_P7_1D	CTL	P7	4	6.22275	388.559	256.555	799.076	365.378	288.905	659.836	363.312	292.278	640.558	345.922	317.052	529.022	338.905	325.878	500.405	313.43	356.963	409.914	219.771	455.585	296.505	383.152	272.293	651.897	381.638	275.068	633.52	357.33	306.485	522.595	350.997	314.769	492.302	333.451	338.288	400.447
C_P7_2A	CTL	P7	11	6.62814	427.685	360.864	841.217	396.679	354.731	697.454	394.595	354.361	678.067	371.986	349.965	555.638	362.715	348.054	530.499	330.249	341.401	433.139	191.56	311.717	307.595	422.326	360.333	694.682	419.207	359.74	674.768	389.11	353.722	549.919	383.135	352.52	526.951	357.427	347.37	422.76
C_P7_2B	CTL	P7	11	6.24476	477.697	295.437	809.601	427.868	308.289	675.032	423.745	309.137	656.222	379.523	320.55	537.049	368.184	323.721	515.233	325.906	335.266	423.918	184.807	379.497	322.904	449.722	300.768	666.721	444.067	302.128	647.935	396.112	314.82	530.004	386.062	317.564	508.263	348.178	327.485	411.299
C_P7_2C	CTL	P7	11	6.14509	490.169	289.746	782.669	431.315	305.182	654.602	426.127	306.46	634.935	383.014	317.578	522.197	367.358	321.772	496.897	319.233	334.537	406.501	164.362	377.516	305.952	456.107	298.061	646.516	449.228	299.828	627.832	396.134	313.746	511.534	386.338	316.334	492.152	344.096	327.335	392.363
C_P7_2D	CTL	P7	11	6.36476	480.253	304.668	824.79	429.339	314.287	690.97	422.751	315.513	671.98	380.455	323.429	554.426	367.504	325.993	530.462	322.499	334.804	438.481	161.464	368.918	330.839	453.03	309.017	685.281	446.698	310.158	663.94	394.938	320.134	544.726	387.475	321.532	524.107	346.372	329.389	423.89
C_P7_2E	CTL	P7	11	6.44475	474.92	328.533	832.204	418.666	332.251	694.883	414.724	332.486	676.954	372.384	335.238	559.035	359.862	336.086	534.769	314.598	339.129	440.368	160.988	350.126	330.386	445.581	330.237	686.577	438.928	330.673	669.183	390.222	333.895	550.752	380.196	334.564	528.553	340.026	337.209	427.075
C_P7_2F	CTL	P7	11	6.10489	384.692	330.282	852.977	365.627	336.689	711.69	363.141	337.544	692.83	350.348	343.244	566.065	346.327	344.389	540.981	319.132	349.179	438.648	203.195	356.868	292.786	389.961	336.543	708.836	389.613	337.397	689.439	365.71	343.357	559.591	364.26	344.338	537.577	344.568	349.195	431.805
C_P7_3A	CTL	P7	8	7.05966	471.309	315.511	871.336	432.292	327.367	723.672	429.2	328.756	703.404	399.397	338.681	574.076	389.001	340.939	551.888	344.843	350.864	451.294	199.318	372.636	328.063	461.915	324.445	719.993	456.295	326.175	698.294	415.579	337.489	564.359	408.402	339.31	544.05	374.309	348.488	437.537
C_P7_3B	CTL	P7	8	7.33172	432.696	320.517	886.254	409.053	326.418	737.529	408.355	326.848	719.912	385.793	332.283	588.105	377.672	333.823	562.17	340.063	340.639	458.262	204.006	360.541	327.797	438.459	322.666	737.368	434.833	323.555	715.368	403.341	330.183	580.848	397.705	331.341	558.251	368.773	337.206	446.199
C_P7_3C	CTL	P7	8	7.37971	486.863	325.877	869.635	441.258	329.554	723.246	436.78	329.85	705.542	394.996	333.25	572.96	384.838	334.239	549.084	337.126	339.099	447.85	193.246	357.862	353.463	467.73	325.682	719.065	463.709	325.792	695.173	413.762	330.379	563.521	404.876	331.254	543.151	362.728	335.105	431.042
C_P7_3D	CTL	P7	8	7.20902	417.643	333.206	894.207	392.398	339.758	743.197	390.591	340.769	723.96	372.363	347.126	589.654	365.972	347.651	569.042	333.034	350.538	460.043	193.145	341.542	327.536	421.795	343.295	745.45	419.259	344.49	721.931	390.382	349.738	584.127	384.739	350.397	562.888	362.657	354.706	452.924
C_P7_3E	CTL	P7	8	6.98244	440.447	344.875	849.559	406.615	342.639	702.071	402.89	342.383	685.553	374.618	340.274	555.093	364.99	340.154	528.61	327.405	339.911	431.954	188.471	346.641	303.428	434.235	340.312	697.973	428.677	340.099	678.359	390.742	338.785	548.793	385.041	338.464	525.588	352.589	337.474	418.777
C_P7_3F	CTL	P7	8	7.23608	429.916	286.696	869.74	401.208	304.119	721.908	398.968	305.845	702.689	373.279	321.697	564.945	366.929	324.904	545.776	332.965	342.191	440.434	199.797	396.229	314.898	425.782	295.283	721.297	421.741	297.742	700.369	391.299	315.439	559.887	384.541	318.803	540.503	359.274	333.349	426.886
C_P7_4A	CTL	P7	6	6.95394	425.87	358.849	898.488	405.589	356.702	748.632	403.433	356.531	730.006	386.181	354.872	594.625	378.541	353.393	569.709	346.696	347.328	461.038	215.971	315.748	329.208	430.644	363.267	749.793	430.489	363.76	724.667	404.702	359.825	590.779	399.284	358.927	566.025	375.496	355.117	450.959
C_P7_4B	CTL	P7	6	6.74096	454.693	327.254	863.669	427.721	335.636	718.613	424.546	336.664	700.03	399.244	344.347	570.494	389.597	346.511	548.766	353.431	355.21	446.103	221.959	380.089	316.861	454.568	331.359	715.958	448.604	332.895	695.364	416.364	341.761	563.68	410.211	343.277	544.902	383.658	350.592	435.974
C_P7_4C	CTL	P7	6	6.8002	486.383	286.521	866.891	439.557	309.879	724.296	435.053	312.312	708.299	392.431	333.308	581.739	381.567	337.696	561.24	334.238	357.292	466.092	188.63	401.551	369.01	464.186	303.986	721.263	460.151	306.54	702.373	408.013	330.003	574.647	400.629	333.843	550.254	360.946	351.945	450.074
C_P7_4D	CTL	P7	6	7.01854	465.176	342.131	831.03	425.585	345.644	685.616	420.708	346.174	664.862	387.052	349.232	539.153	374.736	349.696	512.343	334.109	351.563	414.06	187.997	350.049	301.623	450.758	346.751	680.216	446.709	347.339	658.63	407.344	350.186	532.969	397.93	350.685	508.252	365.227	353.185	399.916
C_P7_4E	CTL	P7	6	7.04553	465.388	332.417	888.662	421.034	339.68	744.757	416.741	340.511	726.366	386.664	346.483	592.293	377.028	347.842	568.643	336.121	353.631	467.636	195.446	366.986	348.806	450.183	337.758	739.916	446.376	338.617	719.344	404.667	345.432	584.529	397.381	346.539	563.901	366.595	351.89	453.205
C_P7_4F	CTL	P7	6	6.8437	459.111	338.283	865.586	421.792	345.346	721.993	418.749	346.148	703.977	389.192	352.424	571.277	379.588	353.87	544.654	341.991	359.361	445.199	203.427	370.759	324.436	450.664	344.059	716.872	446.287	345.111	693.807	408.08	351.768	562.771	400.582	352.98	539.689	372.118	358.372	429.999
C_P7_5A	CTL	P7	4	6.9903	377.392	371.402	865.134	364.873	356.968	711.389	365.954	355.866	695.77	361.642	344.746	567.189	356.011	341.6	539.204	336.395	330.509	440.061	212.819	299.771	296.808	391.029	361.151	713.126	390.035	359.62	696.183	378.408	346.946	562.397	375.534	344.638	539.46	364.383	334.166	431.847
C_P7_5B	CTL	P7	4	7.25997	461.545	329.167	866.103	417.688	336.221	716.608	415.256	336.754	698.508	382.477	342.276	569.571	370.057	344.093	539.714	332.572	349.684	442.091	184.947	367.885	321.167	443.769	333.41	710.093	440.106	334.09	691.32	401.703	340.241	562.162	393.212	341.56	536.482	357.804	347.05	429.92
C_P7_5C	CTL	P7	4	7.27529	444.391	338.183	869.725	406.317	338.901	717.759	403.219	339.084	700.206	375.831	340.276	562.765	367.364	340.244	536.993	327.337	339.639	433.896	191.243	332.182	308.391	435.583	341.249	713.724	431.202	341.371	694.606	394.75	341.876	556.764	388.237	341.939	533.241	358.514	342.317	422.265
C_P7_5D	CTL	P7	4	7.15636	425.737	306.891	861.405	390.032	315.836	713.166	388.844	316.741	692.976	363.492	324.312	557.081	352.498	326.323	530.132	318.949	333.002	434.224	176.792	350.012	311.518	418.894	313.539	709.018	415.964	314.557	689.729	381.659	322.963	552.049	374.666	324.579	526.427	347.753	331.05	421.526
C_P7_6A	CTL	P7	12	6.64571	494.865	276.568	815.257	440.349	292.114	679.808	433.563	294.061	663.088	387.038	306.803	541.069	376.256	310.289	519.312	325.002	327.906	428.617	172.994	394.343	332.979	460.694	281.685	673.829	455.153	282.899	655.586	401.092	299.247	532.657	391.642	302.252	512.95	344.709	316.95	412.396
C_P7_6B	CTL	P7	12	6.40403	507.821	322.732	794.074	446.314	328.903	661.882	440.77	329.65	646.993	391.951	335.017	534.765	382.16	335.972	514.154	323.801	339.478	425.341	157.402	338.882	337.239	470.372	330.266	654.726	464.815	331.015	639.792	408.653	336.223	525.743	398.82	337.088	506.505	346.85	341.44	408.254
C_P7_6C	CTL	P7	12	6.27637	515.205	327.131	781.471	450.45	331.39	650.823	445.37	331.577	634.318	395.531	334.535	520.111	382.46	335.4	493.963	332.338	339.013	406.319	173.204	354.687	307.573	474.607	328.504	644.205	465.37	329.082	624.288	410.983	332.536	509.312	401.044	333.144	487.333	358.699	335.661	390.436
C_P7_6D	CTL	P7	12	6.63249	524.848	324.847	791.029	462.737	330.601	655.033	457.285	331.419	636.298	405.089	336.409	518.673	387.831	337.484	492.23	335.081	340.995	406.554	170.773	344.256	305.958	487.759	331.191	646.8	479.919	331.91	629.786	418.638	336.943	509.554	406.732	337.784	489.169	358.252	342.016	388.634
C_P7_6E	CTL	P7	12	6.1437	482.419	317.517	791.541	431.201	323.484	659.124	426.349	324.208	644.357	380.842	329.721	523.731	368.842	330.628	499.598	322.422	333.796	411.015	166.506	330.458	309.57	453.82	325.383	653.991	447.692	326.255	635.931	392.816	331.133	515.317	385.354	332.179	493.541	346.7	336.546	395.519
C_P7_6F	CTL	P7	12	6.34374	452.918	359.088	843.612	415.923	348.743	704.329	413.934	348.015	686.543	379.445	338.486	563.62	371.773	336.458	541.83	334.376	326.724	444.572	191.907	293.98	335.372	440.774	354.085	701.158	436.415	352.83	682.596	395.756	341.916	556.965	387.708	339.837	536.996	356.926	331.419	432.494
LS1_P7_1A	LS1	P7	7	7.96004	513.843	332.417	871.762	458.86	348.08	725.722	454.634	349.499	709.044	412.546	362.313	576.356	397.839	366.068	548.316	354.689	377.757	448.999	197.147	410.448	339.665	486.441	343.26	721.949	480.656	345.086	702.064	428.619	359.66	570.203	419.628	362.332	543.514	381.309	373.417	437.455
LS1_P7_1B	LS1	P7	7	7.76708	495.493	386.436	872.019	446.445	381.682	728.38	442.938	381.3	711.901	406.872	377.649	583.354	394.646	376.553	560.626	353.352	372.634	451.904	206.201	360.469	329.654	472.647	383.684	725.88	468.11	383.186	704.124	424.12	378.923	575.283	417.151	378.241	553.963	380.43	374.669	444.447
LS1_P7_1C	LS1	P7	7	7.69409	480.576	359.267	884.433	434.53	365.736	736.427	432.108	366.343	717.975	401.196	371.545	584.221	388.353	373.027	555.856	349.487	377.997	450.56	201.692	390.189	318.662	461.222	364.174	734.642	457.716	364.922	713.143	417.759	370.726	577.092	409.653	371.84	552.04	376.193	376.687	438.629
LS1_P7_1D	LS1	P7	7	8.12171	503.888	349.318	870.594	444.14	360.527	722.015	441.369	361.372	704.534	396.284	370.314	576.67	382.261	372.713	549.315	330.894	381.51	448.887	176.363	402.256	332.737	470.506	357.826	714.54	464.543	359.141	693.338	411.414	369.007	564.465	401.842	370.78	541.421	359.498	378.85	431.99
LS1_P7_1E	LS1	P7	7	7.7248	494.259	372.138	893.082	452.711	374.935	741.887	451.846	375.158	725.487	420.791	377.531	589.747	410.65	378.093	562.612	378.223	380.148	454.993	237.683	384.949	319.183	479.746	374.373	738.941	475.677	374.688	720.791	438.751	377.203	584.152	431.279	377.68	559.067	408.019	379.593	446.482
LS1_P7_1F	LS1	P7	7	7.84156	514.431	402.744	884.304	461.512	392.108	736.441	459.405	391.639	719.237	416.472	382.964	587.702	403.759	380.451	562.647	359.17	371.57	458.036	218.547	344.398	335.347	486.108	396.766	734.47	480.977	395.705	712.527	434.925	386.437	580.909	426.773	384.796	557.456	387.608	376.897	441.196
LS1_P7_2A	LS1	P7	11	8.00769	465.356	285.579	870.722	424.607	301.432	722.705	422.229	302.457	707.255	389.051	315.435	581.933	376.647	320.01	554.006	338.695	334.222	454.036	198.772	383.069	328.497	447.737	293.655	723.048	442.691	295.655	702.192	406.219	309.786	573.757	396.719	313.338	549.076	363.07	326.265	438.132
LS1_P7_2B	LS1	P7	11	8.05899	469.692	287.998	897.91	424.392	301.272	752.882	421.655	301.785	736.145	387.738	311.051	609.004	376.928	314.45	580.788	336.764	327.175	478.541	205.347	376.656	360.532	446.079	292.303	750.199	443.455	292.699	731.515	400.807	305.318	598.316	394.568	307.042	575.488	360.781	316.946	467.404
LS1_P7_2C	LS1	P7	11	7.61877	491.925	363.076	850.112	433.277	351.47	712.474	428.798	350.87	696.508	384.187	343.145	570.824	373.928	341.04	548.164	325.819	330.745	449.999	187.492	292.039	340.852	456.617	359.2	708.085	449.831	357.994	689.547	399.804	348.543	563.588	392.019	347.185	541.844	349.171	338.991	435.863
LS1_P7_2D	LS1	P7	11	8.08933	487.427	316.73	852.238	432.396	319.226	711.234	430.353	319.216	694.205	385.865	321.122	567.444	372.434	321.816	542.78	322.873	324.294	442.135	186.854	332.63	341.987	458.443	317.44	708.688	452.246	317.684	688.553	401.193	320.018	559.851	391.386	320.478	536.486	349.95	322.339	428.095
LS1_P7_2E	LS1	P7	11	7.78846	496.687	305.392	863.783	435.991	315.259	722.167	430.008	316.114	704.39	386.1	322.561	579.562	373.79	324.73	556.276	322.932	333.571	456.209	173.256	365.218	344.189	459.134	309.701	717.919	453.953	310.323	698.712	402.116	318.56	571.606	391.518	320.354	549.195	349.031	327.006	441.793
LS1_P7_2F	LS1	P7	11	7.8883	443.658	361.702	906.932	405.312	351.425	757.549	405.195	350.842	740.668	374.839	342.1	604.336	363.597	339.648	577.275	324.722	330.53	464.619	196.763	308.574	333.799	432.51	355.057	754.507	428.437	353.881	736.138	391.478	344.111	596.216	385.018	342.465	573.593	355.767	334.345	451.287
LS1_P7_3A	LS1	P7	15	6.74979	392.692	271.699	809.222	360.535	280.285	665.198	359.113	280.696	648.557	339.151	286.105	533.424	328.488	288.898	503.539	305.651	294.967	410.725	178.793	327.513	277.041	382.994	274.602	663.052	379.575	275.526	644.147	354.91	282.132	527.104	348.57	283.815	501.849	326.183	289.783	404.997
LS1_P7_3B	LS1	P7	15	6.70541	421.085	321.472	811.253	369.603	313.028	674.354	367.715	312.418	654.37	333.403	306.243	535.798	321.738	304.387	507.637	284.48	298.407	415.08	155.988	281.99	305.794	395.46	315.786	669.141	390.747	314.824	647.152	348.79	307.813	529.131	340.718	306.44	505.197	306.322	300.66	406.834
LS1_P7_3C	LS1	P7	15	6.6016	437.508	282.054	766.713	382.316	289.341	637.849	379.179	289.433	618.16	339.498	294.154	505.573	327.456	295.705	475.974	287.683	301.252	394.522	145.97	325.775	287.367	406.161	284.608	632.566	399.907	285.209	609.285	356.347	290.687	497.11	343.634	292.436	470.124	310.725	296.572	385.258
LS1_P7_3D	LS1	P7	15	6.62501	432.531	253.702	786.869	381.461	270.542	655.597	378.34	271.909	638.039	341.179	284.879	522.305	329.879	288.534	495.257	292.291	300.627	407.15	153.441	337.737	294.922	404.067	265.328	650.506	399.372	267.184	629.767	355.621	281.727	514.009	347.566	284.418	492.334	312.395	296.314	393.484
LS1_P7_3E	LS1	P7	15	6.53646	415.088	277.19	802.639	368.221	283.448	665.945	367.216	283.955	647.013	333.5	288.858	531.442	326.689	289.857	507.724	291.54	294.379	412.551	154.551	306.258	288.371	391.538	282	662.438	388.171	282.721	640.967	353.701	287.597	528.643	343.711	288.905	500.618	313.786	293.103	404.649
LS1_P7_3F	LS1	P7	15	6.7639	436.432	295.18	789.656	384.293	295.67	654.936	381.772	295.9	636.275	344.07	296.445	527.672	335.636	296.587	502.205	296.81	296.788	411.519	155.123	293.943	291.196	408.371	296.582	650.151	400.042	296.655	628.985	363.181	297.219	520.926	352.252	297.261	496.248	320.045	297.781	400.222
LS1_P7_4A	LS1	P7	11	6.88877	499.927	310.704	839.721	443.504	317.044	707.099	438.746	317.731	688.09	393.604	322.954	574.255	378.083	324.57	544.338	333.501	329.328	452.419	193.809	340.868	337.218	465.227	315.744	699.667	458.822	316.539	680.757	410.078	322.022	565.828	398.18	323.355	538.081	359.529	327.849	439.455
LS1_P7_4B	LS1	P7	11	7.14769	499.443	372.883	834.15	442.779	359.547	699.724	438.35	358.395	681.655	394.13	347.82	565.271	379.652	344.492	536.357	334.892	334.092	439.412	195.312	304.3	317.881	467.772	364.473	693.43	462.751	363.224	676.927	410.971	351.075	556.631	399.781	348.457	531.143	359.953	338.945	427.197
LS1_P7_4C	LS1	P7	11	7.01406	510.858	312.472	832.405	451.632	321.663	695.5	447.531	322.437	680.112	404.501	329.528	562.924	393.37	331.268	536.637	347.477	338.206	438.44	219.32	353.705	330.687	476.012	319.345	688.942	471.923	320.152	672.059	420.694	328.1	553.747	411.645	329.545	531.083	372.233	335.998	425.491
LS1_P7_4D	LS1	P7	11	7.28925	477.005	327.95	857.268	429.787	329.496	723.757	427.628	329.67	705.931	388.373	331.064	582.579	375.631	331.433	552.017	336.263	332.606	453.901	192.998	334.888	323.349	453.575	329.365	717.205	448.697	329.544	701.144	406.787	330.982	575.263	395.695	331.32	546.793	359.622	332.53	441.45
LS1_P7_4E	LS1	P7	11	7.01276	480.348	277.624	854.251	424.806	302.956	723.597	419.448	305.506	704.269	378.937	324.371	584.35	365.964	330.25	556.204	326.411	348.295	462.823	199.694	403.338	338.949	448.081	293.328	715.812	442.705	295.897	695.713	394.556	317.976	574.951	385.882	322.019	549.042	348.953	339.074	448.712
LS1_P7_4F	LS1	P7	11	6.84472	501.296	270.169	813.616	434.073	298.879	684.739	430.451	300.666	667.113	382.099	321.864	550.071	367.693	328.039	521.438	322.93	347.357	426.744	185.022	402.816	315.521	457.867	289.874	678.854	452.739	292.278	659.479	399.725	315.352	538.637	387.828	320.49	513.306	348.384	337.885	413.239
LS1_P7_5A	LS1	P7	12	7.65246	410.938	349.976	886.381	381.946	345.943	738.446	378.973	345.478	720.85	353.876	341.814	584.675	346.195	340.981	556.509	317.43	337.909	453.318	190.429	330.91	305.298	406.653	346.673	737.624	403.416	346.148	717.632	373.411	342.261	577.944	367.083	341.593	555.587	345.671	338.616	446.379
LS1_P7_5B	LS1	P7	12	7.90216	455.576	336.805	886.343	400.359	338.553	744.444	397.903	338.303	727.146	361.119	338.311	593.957	349.937	338.614	563.513	309.081	339.869	457.236	167.76	351.181	322.875	428.024	335.435	740.523	423.024	335.465	723.385	378.389	336.122	583.38	370.263	336.338	561.112	335.233	336.717	446.681
LS1_P7_5C	LS1	P7	12	8.05201	430.994	347.251	896.003	385.888	343.615	753.387	383.137	343.489	734.238	356.697	341.838	598.264	347.626	341.114	568.787	312.024	338.206	460.361	189.835	325.972	334.308	411.909	346.509	748.69	408.96	346.386	726.896	374.839	343.894	590.796	368.771	343.466	564.94	341.043	341.486	449.402
LS1_P7_5D	LS1	P7	12	7.91948	442.289	342.75	885.939	400.133	343.094	742.273	397.364	343.233	725.843	362.94	343.698	597.473	350.368	343.6	566.635	309.455	343.324	463.849	173.399	339.001	326.546	425.09	344.327	741.043	421.597	344.477	721.818	380.524	344.681	589.721	371.835	344.7	563.207	338.958	344.974	450.825
LS1_P7_5E	LS1	P7	12	7.68245	461.204	360.548	873.225	410.711	355.055	730.167	408.553	354.528	713.787	369.495	349.861	588.434	358.555	348.774	561.064	316.108	344.528	453.859	182.64	337.443	336.713	436.841	355.774	729.64	432.16	354.993	706.848	385.781	350.063	579.475	378.057	349.241	558.254	342.274	344.986	444.14
LS1_P7_5F	LS1	P7	12	7.81625	506.753	443.163	849.307	443.984	402.163	717.631	439.452	398.514	701.01	388.25	364.032	582.879	371.502	353.885	555.936	319.206	321.604	465.635	191.901	255.761	377.47	463.35	409.988	708.399	458.424	406.129	691.437	404.112	370.012	570.88	390.815	361.684	546.677	345.305	331.101	442.356
LS1_P7_6A	LS1	P7	6	7.70923	516.287	377.522	855.382	456.582	369.44	716.518	451.79	368.562	698.701	404.309	361.701	575.629	391.3	360.192	552.736	337.467	353.72	451.313	180.624	340.957	333.631	482.758	370.689	710.469	476.347	369.671	691.171	419.222	362.211	566.29	408.927	360.814	542.257	360.88	354.391	432.887
LS1_P7_6B	LS1	P7	6	7.65269	479.411	308.186	849.087	427.246	317.324	710.468	422.581	318.022	691.566	384.744	324.188	565.814	372.376	326.482	539.926	328.588	334.414	437.846	187.487	363.786	317.155	452.019	311.642	702.998	447.952	312.214	684.503	403.056	319.974	559.509	392.259	321.952	535.548	355.204	328.208	424.254
LS1_P7_6C	LS1	P7	6	7.53312	470.194	341.2	856.153	420.201	345.571	709.785	417.867	346.292	690.897	376.946	349.948	569.243	367.283	350.717	542.722	316.13	353.211	439.078	179.387	353.832	302.943	445.275	346.778	703.938	442.104	347.473	684.926	394.626	351.041	559.497	386.31	351.729	536.07	343.661	354.962	422.745
LS1_P7_6D	LS1	P7	6	7.60595	404.517	338.115	876.729	384.333	341.905	722.899	384.234	342.449	703.286	366.848	345.646	573.207	359.564	346.156	548.473	331.623	348.624	435.2	217.598	349.694	295.873	410.889	342.549	723.281	408.758	343.091	701.96	385.866	346.214	569.658	381.281	346.815	544.031	359.477	349.587	425.293
LS1_P7_6E	LS1	P7	6	7.53562	463.289	393.752	863.203	422.856	379.895	715.095	419.465	378.767	696.006	383.933	366.553	573.054	374.131	363.137	548.005	333.649	349.05	440.634	201.859	302.063	307.439	447.638	388.87	713.305	442.873	387.244	694.524	400.662	372.644	565.616	394.078	370.378	543.373	358.416	358.09	425.345
LS1_P7_6F	LS1	P7	6	7.67651	507.342	337.514	841.399	448.383	341.507	699.848	444.216	341.903	682.005	394.907	345.332	557.431	379.372	346.193	533.351	330.435	349.233	434.766	172.178	356.156	316.399	473.468	340.757	694.689	467.09	341.259	674.525	410.837	344.918	549.88	399.779	345.645	524.852	355.19	348.631	420.1
LS2_P7_1A	LS2	P7	13	6.61284	513.403	341.101	765.554	465.908	357.112	630.189	462.099	358.552	612.83	429.203	369.92	507.377	417.449	373.701	481.524	376.182	386.876	394.867	239.027	426.19	294.899	489.034	350.977	626.326	482.901	353.17	603.582	443.08	366.357	500.052	434.186	369.316	476.376	397.611	381.46	379.983
LS2_P7_1B	LS2	P7	13	6.66009	535.018	364.456	793.452	480.589	370.902	660.676	474.051	371.736	643.341	433.232	377.072	532.186	420.696	378.286	507.859	374.391	382.993	412.817	230.887	389.327	308.777	505.078	370.756	656.846	497.241	371.827	634.441	451.143	377.123	525.748	438.631	378.429	499.282	400.022	383.278	398.714
LS2_P7_1C	LS2	P7	13	6.77219	530.874	386.401	780.416	477.265	383.561	648.309	472.712	383.211	630.78	432.324	380.949	524.148	418.416	380.394	500.453	374.214	378.382	410.743	227.645	375.069	308.472	500.301	383.679	640.973	493.666	383.273	621.444	448.404	380.967	515.27	438.565	380.462	491.983	401.038	378.422	396.485
LS2_P7_1D	LS2	P7	13	6.7837	536.159	338.221	770.367	481.659	349.933	643.478	474.919	351.442	626.63	431.767	360.719	526.099	417.075	363.549	498.041	369.491	372.458	411.986	227.487	389.745	329.989	502.336	348.314	638.524	494.429	350.188	616.836	447.771	359.783	516.31	437.279	361.93	493.906	393.919	371.015	397.316
LS2_P7_1E	LS2	P7	13	7.74236	537.484	413.622	722.35	475.68	411.852	597.692	467.659	411.626	582.306	419.299	410.24	484.525	404.349	409.821	456.761	353.506	408.45	375.358	209.912	405.147	287.956	496.159	412.248	591.483	487.197	411.987	572.237	434.882	410.518	474.079	422.346	410.167	450.611	376.343	408.853	358.802
LS2_P7_1F	LS2	P7	13	6.871	552.877	356.413	771.501	489.277	375.49	645.676	483.645	377.201	629.152	438.059	390.915	529.203	423.046	395.402	503.334	371.322	410.856	415.719	228.293	452.999	317.612	510.875	369.224	636.755	503.172	371.556	616.144	452.994	386.606	517.128	440.716	390.275	496.047	396.753	403.502	399.462
LS2_P7_2A	LS2	P7	12	7.10398	474.383	410.248	823.619	430.03	398.505	683.245	426.826	397.253	665.177	398.57	388.348	547.793	387.061	385.866	522.467	347.184	376.75	424.577	208.732	356.234	303.396	455.925	401.01	679.759	453.476	399.694	658.889	416.825	389.933	541.777	406.68	387.663	517.826	373.855	378.839	411.327
LS2_P7_2B	LS2	P7	12	6.99596	492.174	353.217	778.449	439.393	362.799	639.814	435.236	363.558	621.798	396.203	370.648	513.572	383.459	372.957	487.028	339.316	380.952	399.107	206.074	404.972	300.048	462.779	358.597	635.728	457.065	359.638	615.117	412.337	367.754	503.752	401.088	369.794	478.211	367.892	375.824	385.528
LS2_P7_2C	LS2	P7	12	7.0745	531.689	365.679	781.934	456.388	373.1	648.342	452.073	373.732	632.561	399.756	379.38	520.347	386.542	380.719	495.461	331.758	385.938	405.336	179.678	396.469	311.118	481.56	371.995	638.824	473.676	372.817	623.049	415.863	378.763	510.707	405.052	379.913	488.185	358.999	384.862	390.312
LS2_P7_2D	LS2	P7	12	6.97683	493.935	370.655	803.018	441.732	373.614	667.94	437.104	373.94	649.113	400.351	376.161	539.333	387.21	376.871	509.05	343.958	379.139	416.907	207.811	384.602	306.546	467.393	372.823	663.156	461.675	373.225	639.985	416.601	375.726	529.261	406.917	376.283	503.272	374.459	378.313	398.946
LS2_P7_2E	LS2	P7	12	7.11196	520.206	340.42	794.365	459.451	352.849	660.477	451.807	354.418	645.558	403.83	364.213	531.687	391.763	366.691	509.065	340.495	377.23	416.349	199.74	406.56	322.138	479.61	348.607	656.961	473.544	349.829	636.299	418.414	361.126	522.211	410.737	362.69	502.888	368.793	371.244	399.621
LS2_P7_2F	LS2	P7	12	7.09978	525.065	377.985	798.374	461.193	377.634	664.529	454.737	377.504	647.138	409.315	376.977	540.561	392.56	377.048	512.143	343.467	377.085	421.868	198.083	381.383	326.357	483.933	376.396	656.271	476.554	376.232	635.723	423.99	376.014	528.501	413.214	375.954	505.892	370.371	375.468	405.797
LS2_P7_3A	LS2	P7	14	6.75232	465.131	283.443	771.092	407.062	294.601	642.34	401.309	295.643	625.419	359.895	303.378	518.771	343.903	306.565	490.923	301.404	314.831	403.272	158.703	345.596	309.242	429.77	289.4	637.043	423.161	290.58	616.42	375.387	299.737	508.948	366.67	301.389	488.118	325.499	309.197	389.989
LS2_P7_3B	LS2	P7	14	7.03845	443.73	298.128	799.579	393.74	300.868	664.293	390.458	301.076	647.576	350.748	303.264	536.719	339.081	303.892	508.511	300.657	305.95	418.577	166.332	312.416	313.039	418.829	299.739	661.495	411.758	300.137	639.382	366.936	302.56	527.9	359.538	302.976	505.009	326.727	304.817	404.013
LS2_P7_3C	LS2	P7	14	6.82607	500.627	304.443	759.655	435.55	308.231	635.055	427.61	308.695	618.984	376.606	311.69	512.216	363.139	312.476	485.763	315.047	315.251	402.385	173.624	322.995	301.77	457.441	307.096	628.381	449.792	307.559	607.564	393.916	310.809	501.244	382.167	311.494	478.629	342.031	313.871	387.373
LS2_P7_3D	LS2	P7	14	6.49452	470.68	237.399	765.016	411.346	262.668	639.555	406.065	265.028	622.288	365.763	282.47	521.825	352.709	288.025	494.492	311.733	305.422	410.794	176.778	359.392	318.365	432.151	254.755	631.419	425.725	257.572	613.444	379.605	277.285	512.003	368.765	281.905	488.928	332.977	297.463	395.858
LS2_P7_3E	LS2	P7	14	6.62569	448.928	280.67	763.974	396.379	289.745	635.837	392.533	290.417	616.95	358.265	296.352	513.112	345.532	298.548	486.389	307.433	305.122	399.305	172.46	328.239	298.64	421.028	285.543	630.122	414.274	286.712	611.609	374.665	293.562	503.375	364.666	295.286	481.812	332.302	300.89	386.287
LS2_P7_3F	LS2	P7	14	6.64403	444.698	340.445	781.592	398.85	328.594	648.157	394.071	327.614	630.757	361.896	320.543	520.059	350.413	317.062	493.66	316.388	307.543	404.561	191.808	256.828	295.485	418.982	338.228	646.086	413.705	337.38	623.67	376.218	327.919	511.443	368.371	325.766	490.312	340.363	319.839	390.822
LS2_P7_4A	LS2	P7	7	7.89386	495.312	254.861	823.856	434.62	283.564	686.732	427.498	286.976	669.019	381.431	309.184	549.289	370.194	314.49	524.196	323.649	336.31	426.21	186.883	395.477	322.089	457.825	274.179	680.103	450.555	277.78	657.641	397.337	302.917	538.578	389.028	306.887	518.304	347.723	326.849	409.102
LS2_P7_4B	LS2	P7	7	7.6762	485.487	313.674	807.048	424.627	310.163	674.151	419.873	309.942	658.296	376.45	307.656	540.746	364.363	306.923	518.088	315.653	304.032	420.037	163.407	293.05	315.655	452.287	312.401	667.949	445.736	312.062	649.642	392.919	309.034	532.321	384.035	308.526	512.448	342.05	306.252	405.412
LS2_P7_4C	LS2	P7	7	7.68518	482.336	299.525	814.93	420.744	303.464	676.09	416.708	303.624	658.205	370.523	306.404	538.459	359.445	307.161	517.818	301.508	311.226	419.682	153.089	323.311	318.74	447.392	301.028	670.248	441.446	301.326	649.422	387.648	304.76	527.59	378.933	305.297	506.162	330.927	308.381	399.141
LS2_P7_4D	LS2	P7	7	7.8901	384.772	299.807	863.272	358.247	305.153	708.154	356.913	305.32	693.784	346.383	306.246	555.42	339.057	307.988	529.606	319.25	312.134	423.653	201.449	344.644	297.336	389.179	296.146	711.092	386.685	296.544	689.794	366.939	300.169	551.507	363.891	300.688	527.56	345.197	304.367	412.556
LS2_P7_4E	LS2	P7	7	7.77623	409.888	270.514	827.977	378.645	292.895	681.902	375.848	295.477	662.558	352.303	313.607	538.793	344.742	318.075	513.712	308.466	337.943	410.401	182.382	384.443	295.677	403.595	286.066	678.903	402.672	288.251	658.076	370.613	309.132	530.781	365.516	313	504.594	338.476	330.851	394.635
LS2_P7_4F	LS2	P7	7	7.68827	408.609	316.328	857.377	376.944	321.062	706.972	375.921	321.185	691.815	355.596	324.13	563.027	346.869	325.486	539.171	312.765	330.754	434.554	179.58	352.164	312.321	403.874	316.662	707.266	401.707	316.949	684.378	372.492	321.353	557.828	366.815	322.219	536.521	341.826	325.962	420.004
LS2_P7_5A	LS2	P7	9	8.57037	453.924	314.72	866.814	417.003	335.184	725.066	415.539	336.491	707.947	389.593	352.128	579.22	383.689	355.362	557.45	347.074	374.58	441.827	217.122	429.755	333.453	441.783	325.742	720.714	438.861	327.663	702.502	407.407	345.476	572.968	403.181	348.045	551.466	372.859	365.09	429.539
LS2_P7_5B	LS2	P7	9	8.56672	435.176	340.504	878.107	398.638	345.288	721.934	397.826	345.096	706.111	370.972	348.243	576.058	364.515	349.245	554.943	320.544	356.774	440.401	181.837	386.713	335.155	425.024	339.113	722.081	422.966	339.138	703.177	385.89	344.59	569.457	382.147	344.959	548.459	352.725	348.917	427.092
LS2_P7_5C	LS2	P7	9	8.36695	471.473	384.289	872.685	421.37	372.646	722.693	419.434	371.874	706.177	388.341	363.552	576.546	376.993	361.323	556.169	332.625	351.644	444.421	190.169	327.631	321.294	450.485	376.775	721.915	445.348	375.33	698.149	406.517	365.93	569.344	398.722	364.155	547.248	362.155	355.367	428.095
LS2_P7_5D	LS2	P7	9	8.88923	416.533	315.906	889.303	381.406	317.182	740.079	379.649	317.098	723.13	357.133	317.264	585.857	350.741	317.567	563.239	317.405	319.143	444.897	178.667	331.518	323.663	408.091	314.402	737.87	406.727	314.253	719.4	378.194	314.976	578.16	372.449	315.227	556.452	347.178	315.878	432.047
LS2_P7_5E	LS2	P7	9	8.46934	434.456	323.315	882.272	383.93	319.617	732.295	381.521	319.767	715.228	350.99	318.912	582.769	343.685	318.372	561.237	298.337	314.339	448.263	158.05	293.827	342.43	411.558	324.455	728.906	406.978	324.38	707.421	369.141	322.268	575.16	362.224	321.808	553.208	329.477	320.182	432.634
LS2_P7_5F	LS2	P7	9	8.76618	425.501	326.702	889.601	384.526	322.979	737.586	381.455	322.788	721.078	356.137	321.2	585.869	347.807	320.348	560.484	309.264	316.303	449.027	169.303	296.54	338.527	412.617	327.368	735.291	409.705	327.259	715.454	375.778	324.338	580.242	367.564	323.535	553.045	339.983	321.338	432.843
LS2_P7_6A	LS2	P7	16	7.01319	428.939	285.879	781.884	385.329	299.772	645.902	383.174	301.207	627.112	351.389	311.891	519.009	340.073	314.888	493.521	299.005	325.554	404.45	163.215	349.272	296.14	407.562	297.37	639.744	402.443	299.478	616.094	365.607	310.614	510.903	357.484	312.971	489.296	324.58	323.348	388.394
LS2_P7_6B	LS2	P7	16	6.40519	406.962	224.814	749.121	369.764	261.788	622.018	367.165	265.134	604.174	339.661	293.216	501.446	330.414	302.1	473.452	298.504	331.609	390.37	187.444	419.422	276.179	386.33	250.717	615.228	381.164	256.145	594.12	353.003	284.552	493.008	343.543	293.399	467.22	318.203	318.917	376.75
LS2_P7_6C	LS2	P7	16	6.93772	402.956	286.052	776.861	367.377	305.98	637.865	365.109	307.931	618.607	339.061	322.66	514.718	328.282	327.887	484.974	297.595	342.671	401.78	159.698	391.797	292.029	390.013	299.306	634.662	384.549	302.7	608.223	356.008	318.065	506.197	347.624	322.217	481.737	321.532	336.395	386.454
LS2_P7_6D	LS2	P7	16	6.71147	440.694	310.029	776.379	393.281	318.553	642.52	388.278	319.611	626.252	353.608	326.52	519.194	343.391	328.051	494.496	301.858	333.304	407.262	160.859	336.444	310.309	414.051	319.492	637.798	408.396	321.051	614.481	367.854	327.6	510.054	359.901	328.897	489.4	325.634	334.987	393.614
LS2_P7_6E	LS2	P7	16	6.62578	397.658	346.777	767.082	364.666	338.803	632.086	359.586	337.486	615.8	331.599	330.57	508.937	321.599	327.88	481.786	286.292	318.245	392.814	164.148	280.706	297.281	383.609	344.973	629.365	378.32	343.718	606.542	347.426	335.814	502.175	339.373	333.706	477.345	309.944	326.036	385.016
LS2_P7_6F	LS2	P7	16	6.76048	414.789	239.215	782.066	376.56	271.557	646.804	371.357	275.979	628.076	347.282	297.503	525.214	338.613	304.697	496.685	307.299	329.562	410.763	196.2	405.082	300.154	394.394	260.918	641.865	389.888	265.104	620.209	362.184	288.806	518.139	353.426	295.95	491.217	327.882	317.777	397.521
